# Supplementary material
Source: PubMed Central journal article supplement (PMC2650083)

# **Stereoselective Syntheses of the C(1)-C(9) Fragment of Amphidinolide C**

Robert H. Bates,<sup>a</sup> J. Brad Shotwell,<sup>b</sup> and William R. Roush<sup>a,b,\*</sup>

<sup>a</sup>Department of Chemistry, Scripps Florida, Jupiter, Florida 33458

<sup>b</sup>Department of Chemistry, University of Michigan, Ann Arbor, Michigan 41809

e-mail: roush@scripps.edu

## **Supporting Information**

**Selected <sup>1</sup>H NMR and <sup>13</sup>C NMR Spectra for Key Intermediates**

## Table of Contents

|                            | <b>Page</b> |
|----------------------------|-------------|
| NMR Spectra of <b>13</b>   | SI-3        |
| NMR Spectra of <b>SI-1</b> | SI-5        |
| NMR Spectra of <b>SI-2</b> | SI-7        |
| NMR Spectra of <b>SI-3</b> | SI-9        |
| NMR Spectra of <b>12a</b>  | SI-11       |
| NMR Spectra of <b>SI-4</b> | SI-13       |
| NMR Spectra of <b>16</b>   | SI-15       |
| NMR Spectra of <b>17</b>   | SI-17       |
| NMR Spectra of <b>18</b>   | SI-19       |
| NMR Spectra of <b>20</b>   | SI-21       |
| NMR Spectra of <b>SI-6</b> | SI-23       |
| NMR Spectra of <b>SI-7</b> | SI-25       |
| NMR Spectra of <b>21</b>   | SI-27       |
| NMR Spectra of <b>8</b>    | SI-29       |
| NMR Spectra of <b>22</b>   | SI-31       |
| NMR Spectra of <b>24</b>   | SI-33       |
| NMR Spectra of <b>26</b>   | SI-35       |
| NMR Spectra of <b>27</b>   | SI-37       |
| NMR Spectra of <b>28</b>   | SI-39       |

STANDARD PROTON PARAMETERS

SI-3

Pulse Sequence: s2pu1  
Solvent: CDCl3  
Ambient temperature  
INOVA-500 "Sn"  
PULSE SEQUENCE  
Relax. delay 1.000 sec  
Pulse 44.6 degrees  
Acq. time 2.500 sec  
Width 8000.0 Hz  
16 repetitions  
OBSERVE Hz: 499.9042555 MHZ  
DATA PROCESSING  
F1 size 65536  
Total time 0 min, 56 sec

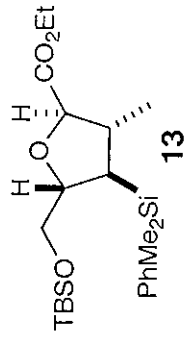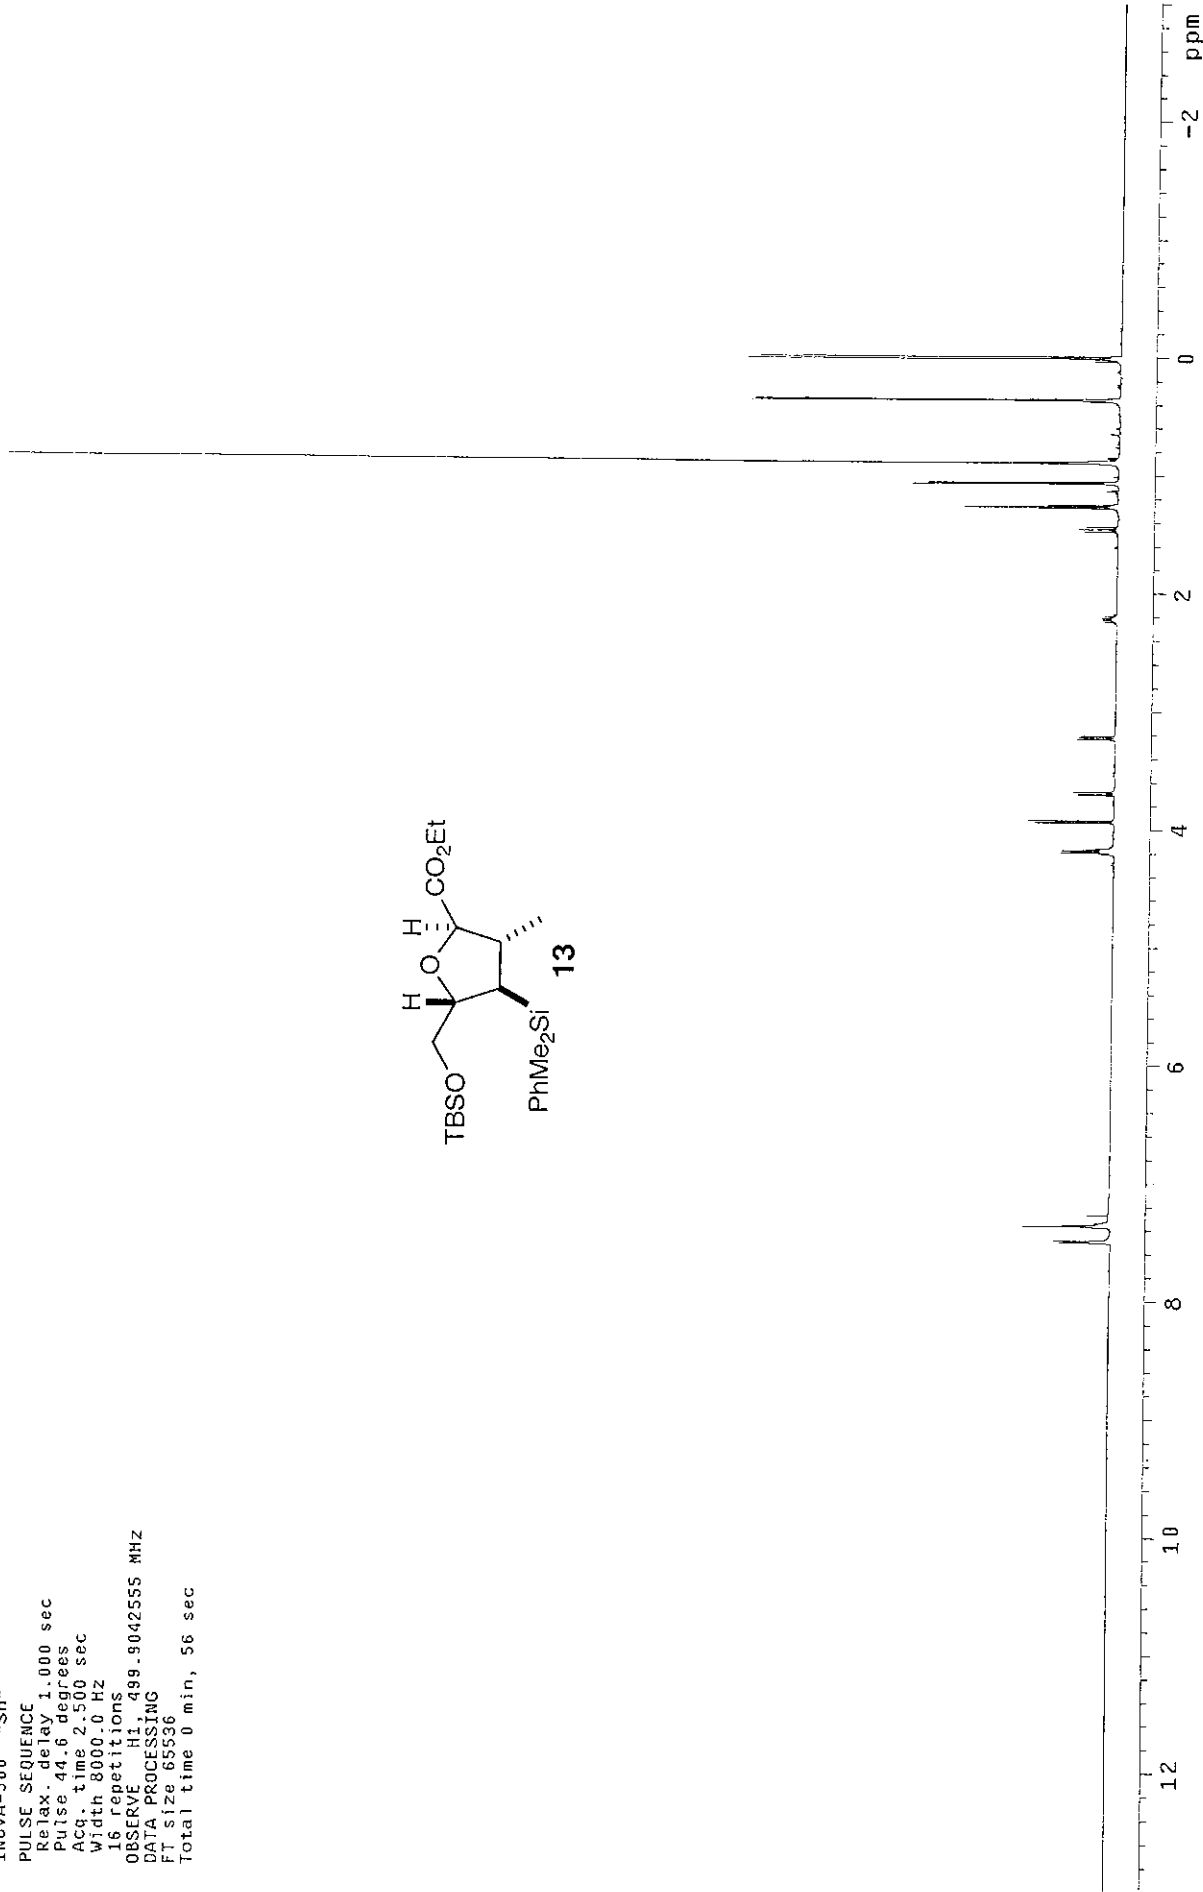

STANDARD CARBON PARAMETERS

Pulse Sequence: s2pu1

Solvent: CDCl3

Ambient temperature

User: 1-14-87

NOVA-500 "Sn"

PULSE SEQUENCE

Relax. delay 1.000 sec

Pulse 39.7 degrees

Acq. time 1.300 sec

Width 29896.3 Hz

480 repetitions

OBSERVE C13, 125.7010316 MHz

DECOUPLE H1, 499.9067532 MHz

Power 32 dB

continuously on

WALTZ-16 modulated

DATA PROCESSING

Line broadening 0.5 Hz

FT size 131072

Total time 39 min, 24 sec

SI-4

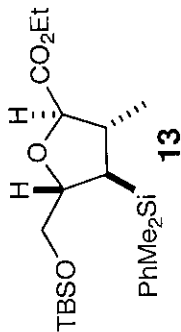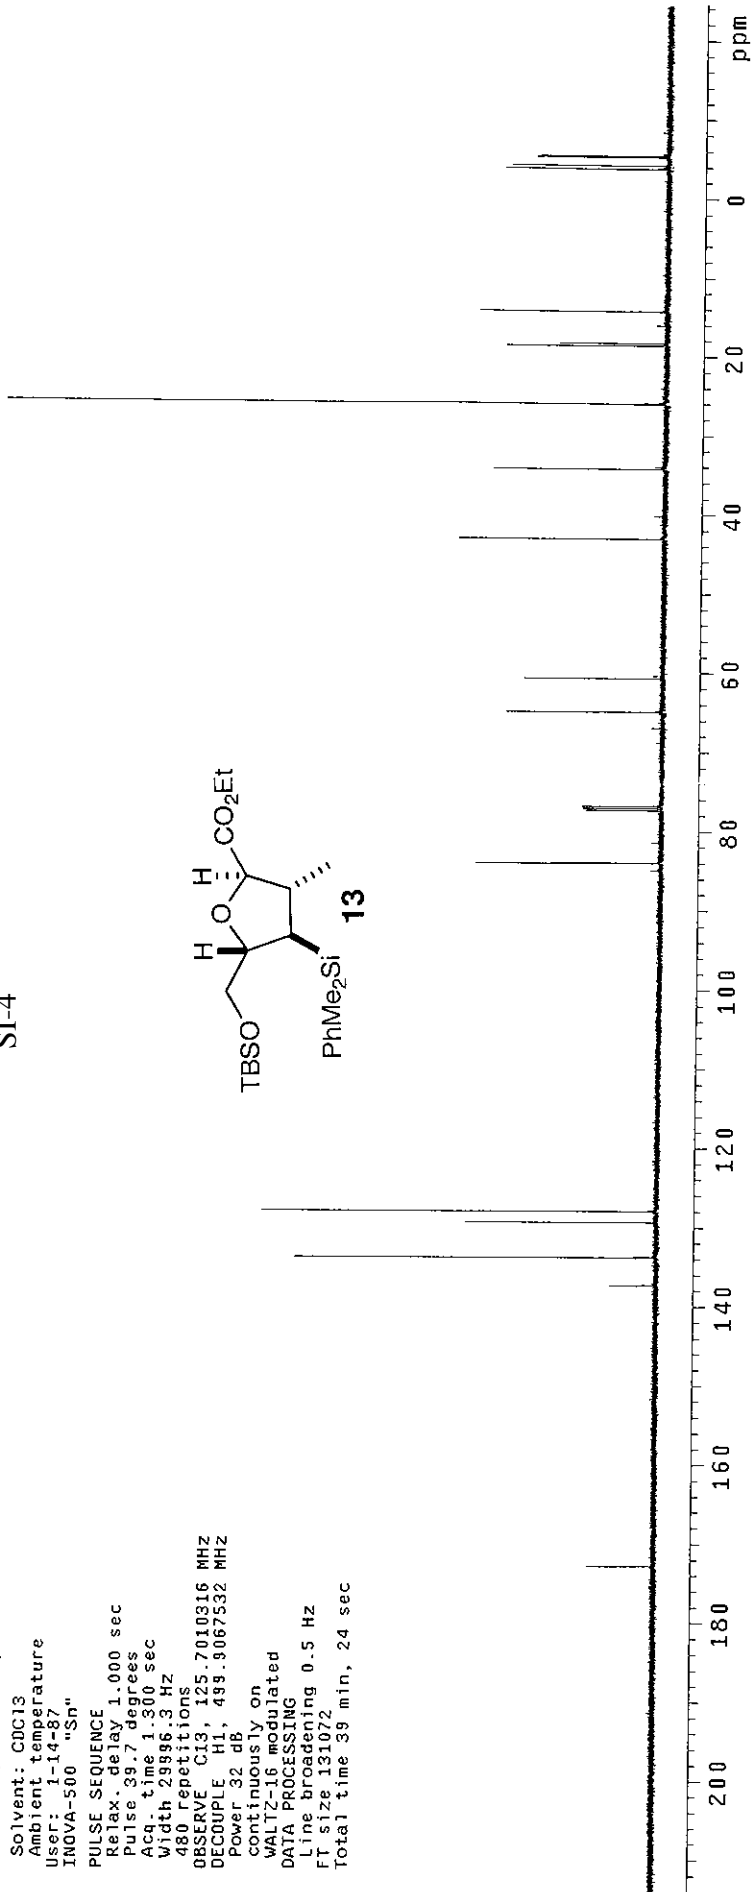

STANDARD PROTON PARAMETERS

Pulse Sequence: s2pu1  
Solvent: CDCl3  
Ambient temperature  
INOVA-500 "Sn"  
PULSE SEQUENCE  
Relax. delay 1.000 sec  
Pulse 41.6 degrees  
Acq. time 2.500 sec  
width 8000.0 Hz  
16 repetitions  
OBSERVE HI, 499.9042550 MHz  
DATA PROCESSING  
FT size 65536  
Total time 0 min, 56 sec

SI-5

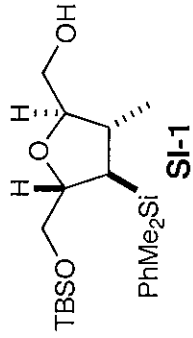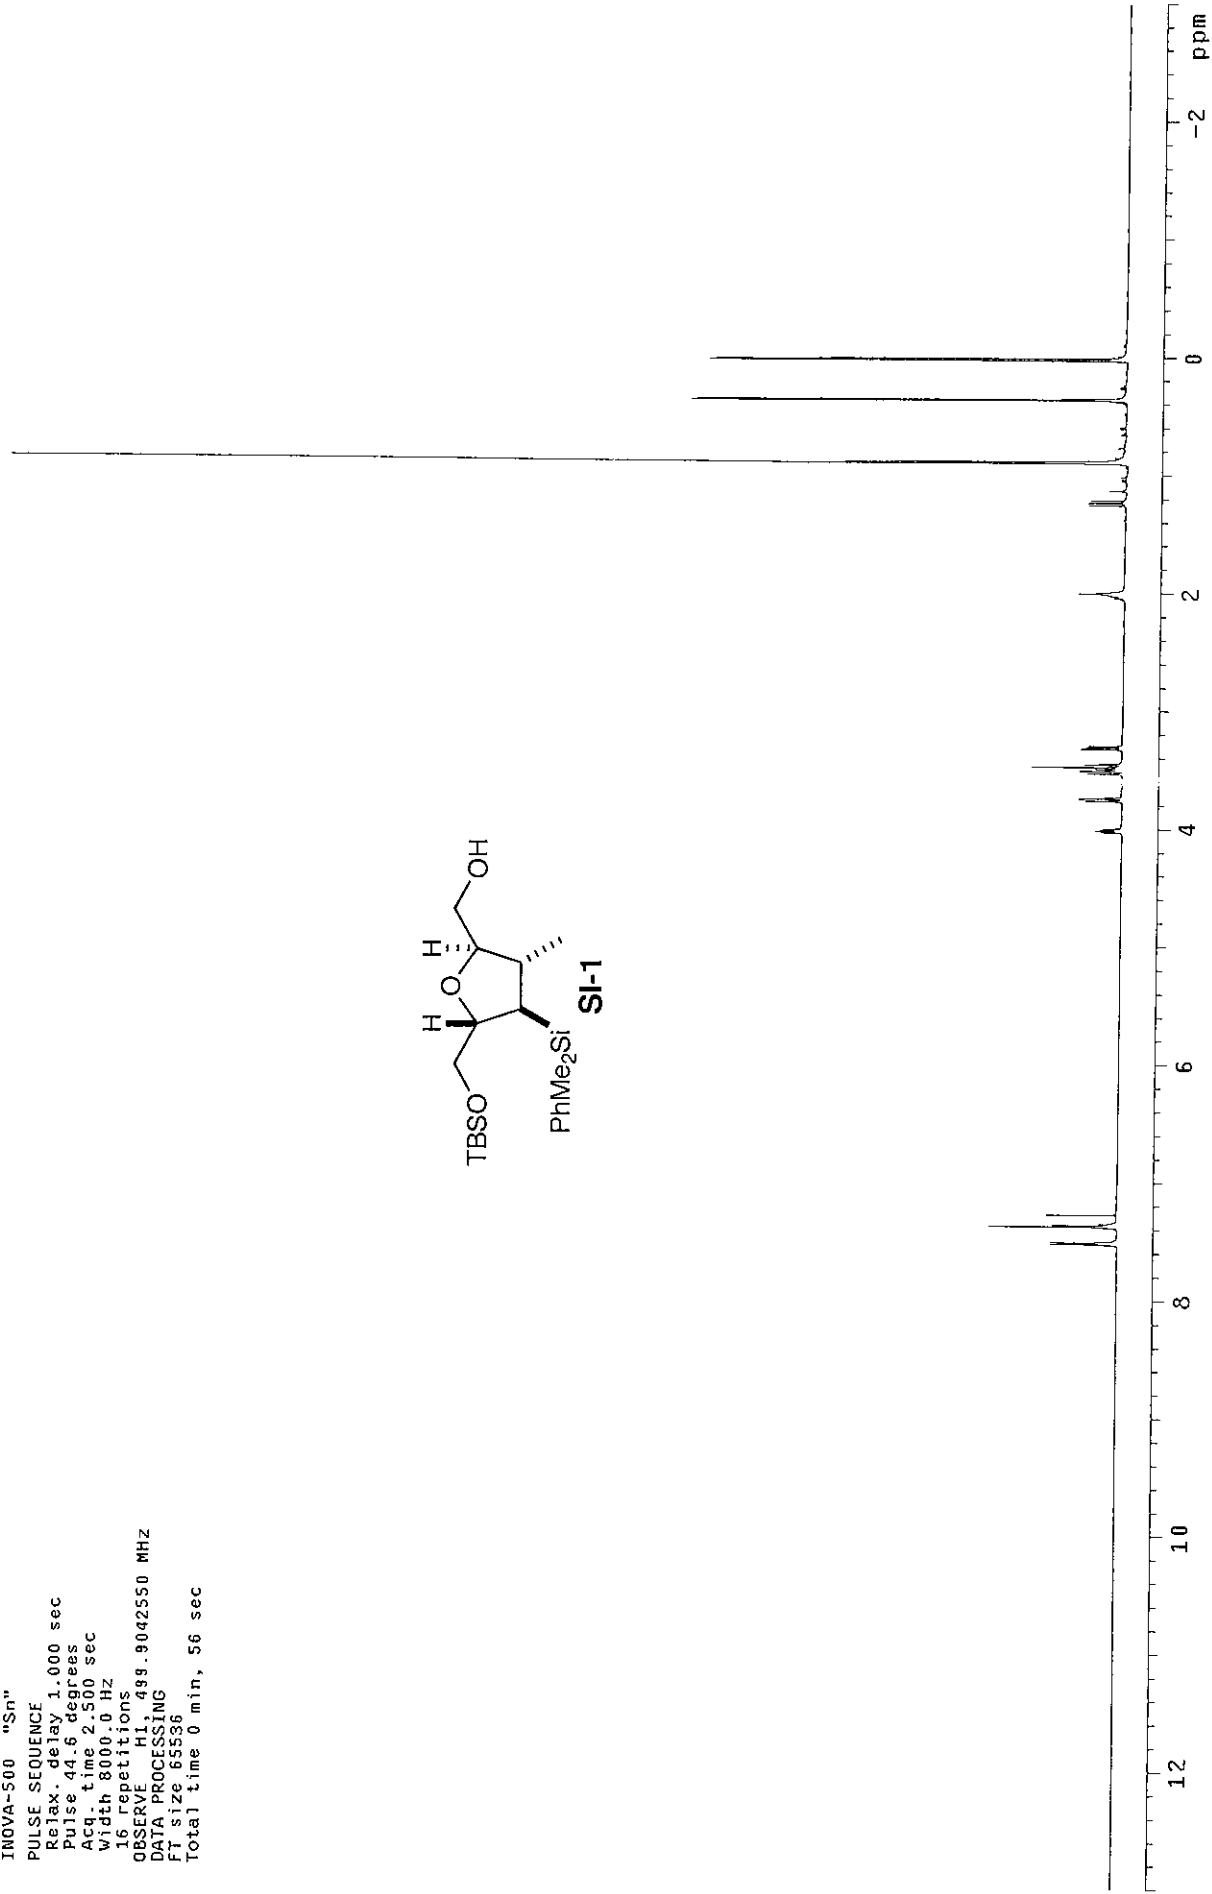

## STANDARD CARBON PARAMETERS

Pulse Sequence: s2bu1  
 Solvent: CDCl3  
 Ambient temperature  
 User: i-14-87  
 INOVA-500 "Sn"  
 PULSE SEQUENCE  
 Relax delay 1.000 sec  
 Pulse 39.7 degrees  
 Acq. time 1.300 sec  
 Width 29986.3 Hz  
 64 repetitions  
 OBSERVE C13, 125.7010307 MHZ  
 DECOUPLE H1, 499.9067532 MHZ  
 Power 32 dB  
 continuously on  
 WALTZ-16 modulated  
 DATA PROCESSING  
 Line broadening 0.5 Hz  
 FT size 131072  
 Total time 39 min, 24 sec

SI-6

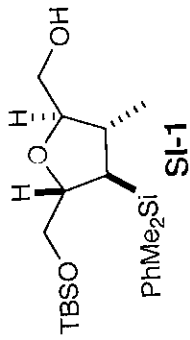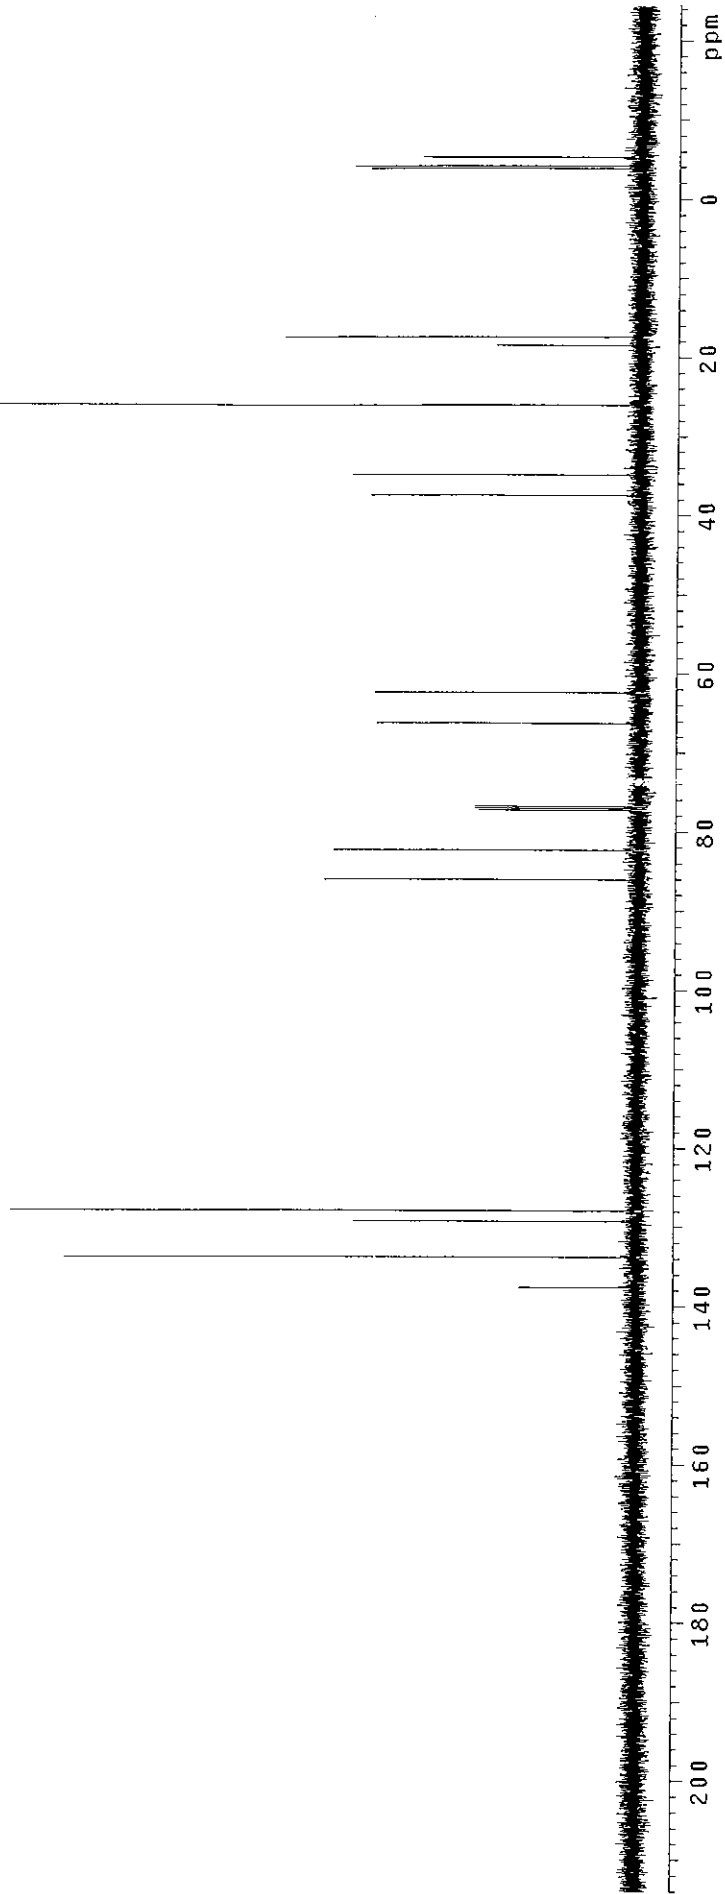

STANDARD PROTON PARAMETERS

Pulse Sequence: s2pu1

Solvent: CDC13

Ambient temperature

INOVA-500 "Sn"

PULSE SEQUENCE

Relax. delay 1.000 sec

Pulse 44.6 degrees

Acq. time 2.500 sec

Width 8000.0 Hz

8 repetitions

RESERVE H1, 499.9042537 MHZ

DATA PROCESSING

FT size 65536

Total time 0 min, 56 sec

SI-7

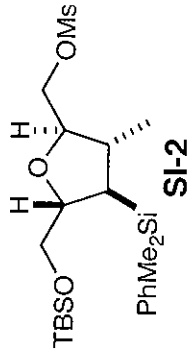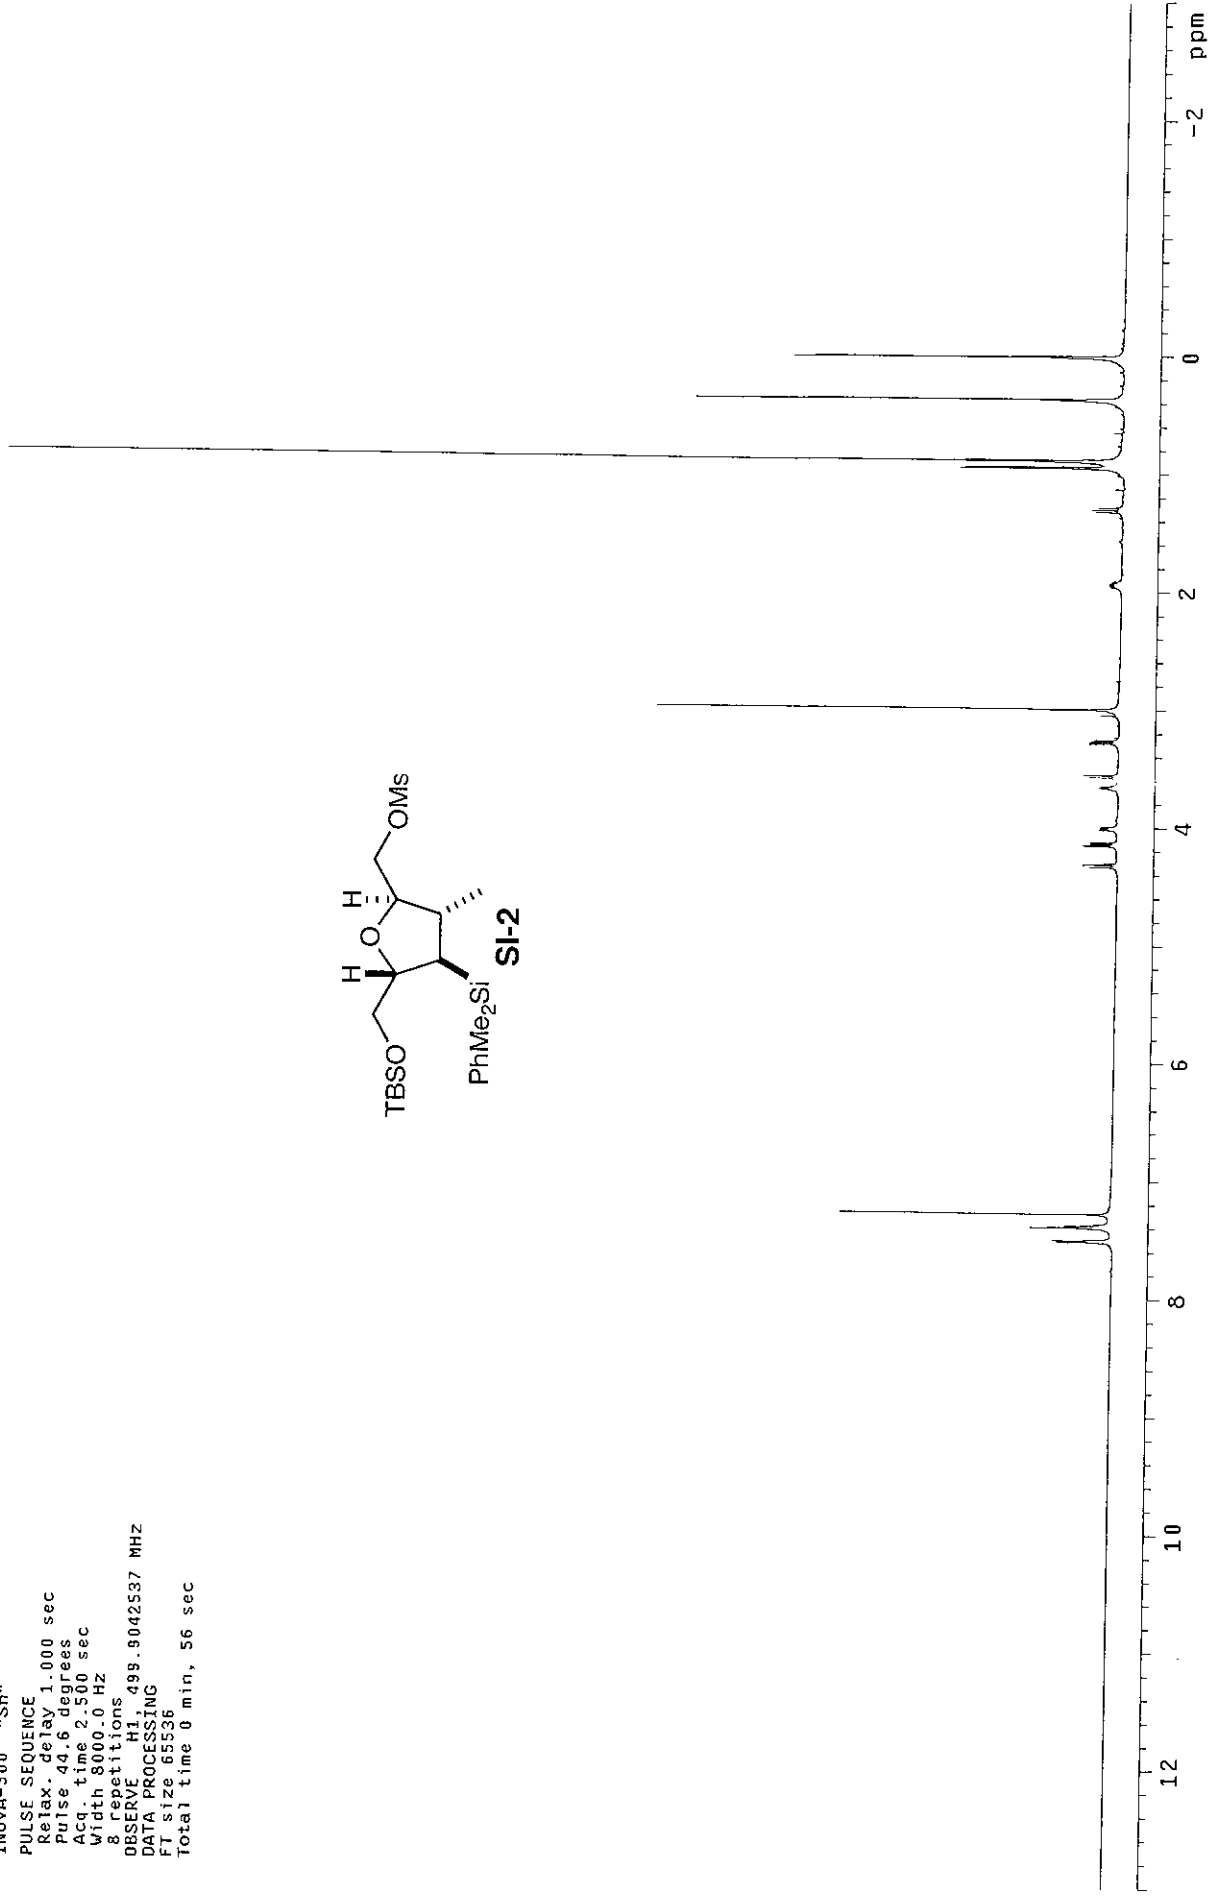

STANDARD CARBON PARAMETERS

Pulse Sequence: s2pu1  
Solvent: CDCl3  
Ambient temperature  
User: 1-14-B7  
IROVA-500 "Sn"  
PULSE SEQUENCE  
Relax delay 1.000 sec  
Pulse 39.7 degrees  
Acq. time 1.500 sec  
Width 29996.3 Hz  
160 repetitions  
OBSERVE C13, 125.7009946 MHz  
DECOUPLE H1, 499.9067532 MHz  
Power 32 dB  
continuously on  
WALTZ-16 modulated  
DATA PROCESSING  
Line broadening 0.5 Hz  
FT size 331072  
Total time 39 min, 24 sec

SI-8

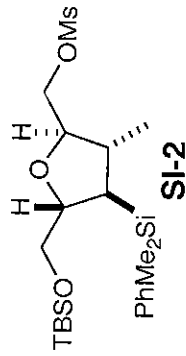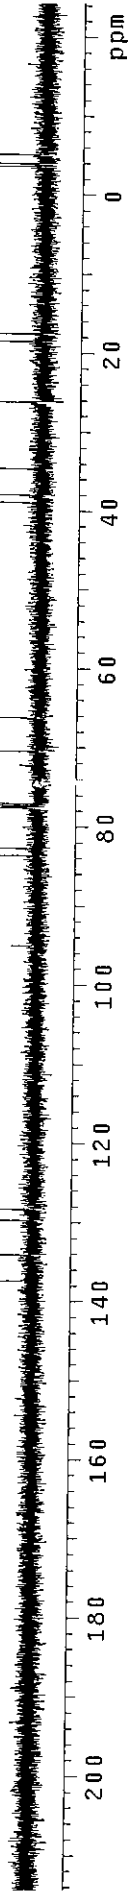



## STANDARD PROTON PARAMETERS

Pulse Sequence: s2pul  
 Solvent: CDCl<sub>3</sub>  
 Ambient temperature  
 INOVA-500 "Si"  
 PULSE SEQUENCE  
 Relax delay 1.000 sec  
 Pulse 44.6 degrees  
 Acq time 2.500 sec  
 Width 8000.0 Hz  
 16 repetitions  
 OBSERVE H1, 499.9042553 MHZ  
 DATA PROCESSING  
 FT size 65536  
 Total time 0 min, 56 sec

SI-9

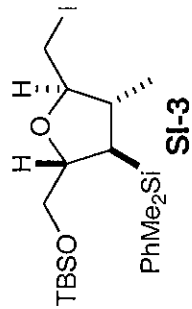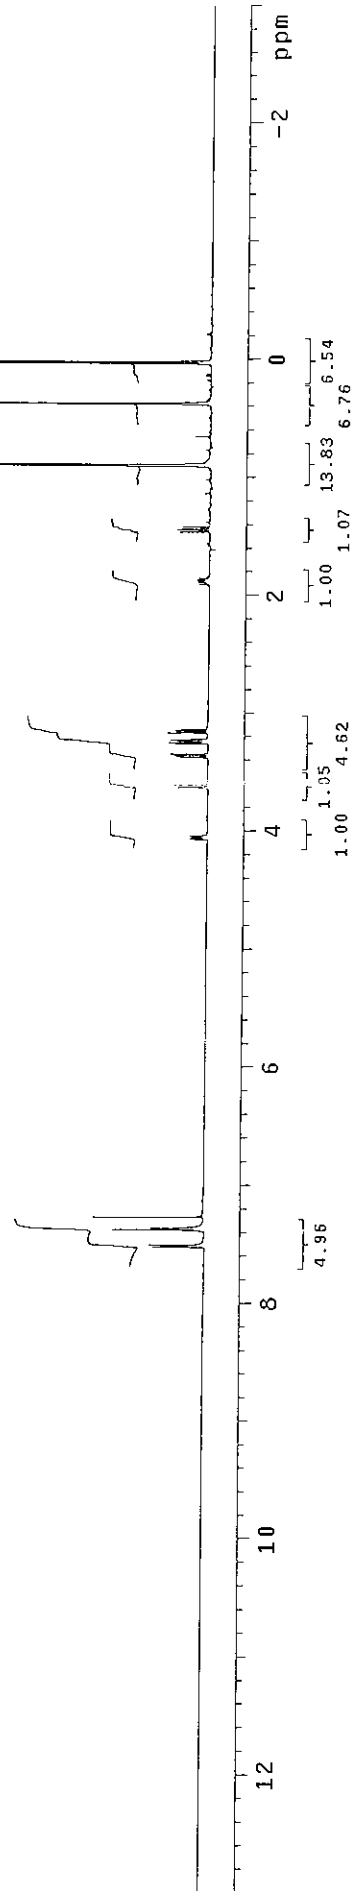

## STANDARD CARBON PARAMETERS

Pulse Sequence: s2pu1  
 Solvent: CDCl3  
 Ambient temperature  
 User: i-14-87  
 INOVA-500 "Sn"  
 PULSE SEQUENCE  
 Relax delay 1.000 sec  
 Pulse 39.7 degrees  
 Acq. time 1.300 sec  
 Width 29986.3 Hz  
 96 repetitions  
 OBSERVE C13, 125.7010330 MHZ  
 DECOUPLE H1, 499.9067532 MHZ  
 Power 32 dB  
 continuously on  
 WAIT-16 modulated  
 DATA PROCESSING  
 Line broadening 0.5 Hz  
 FT size 131072  
 Total time 39 min, 24 sec

SI-10

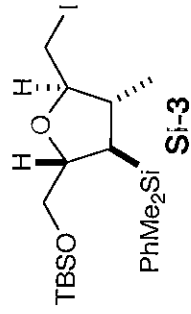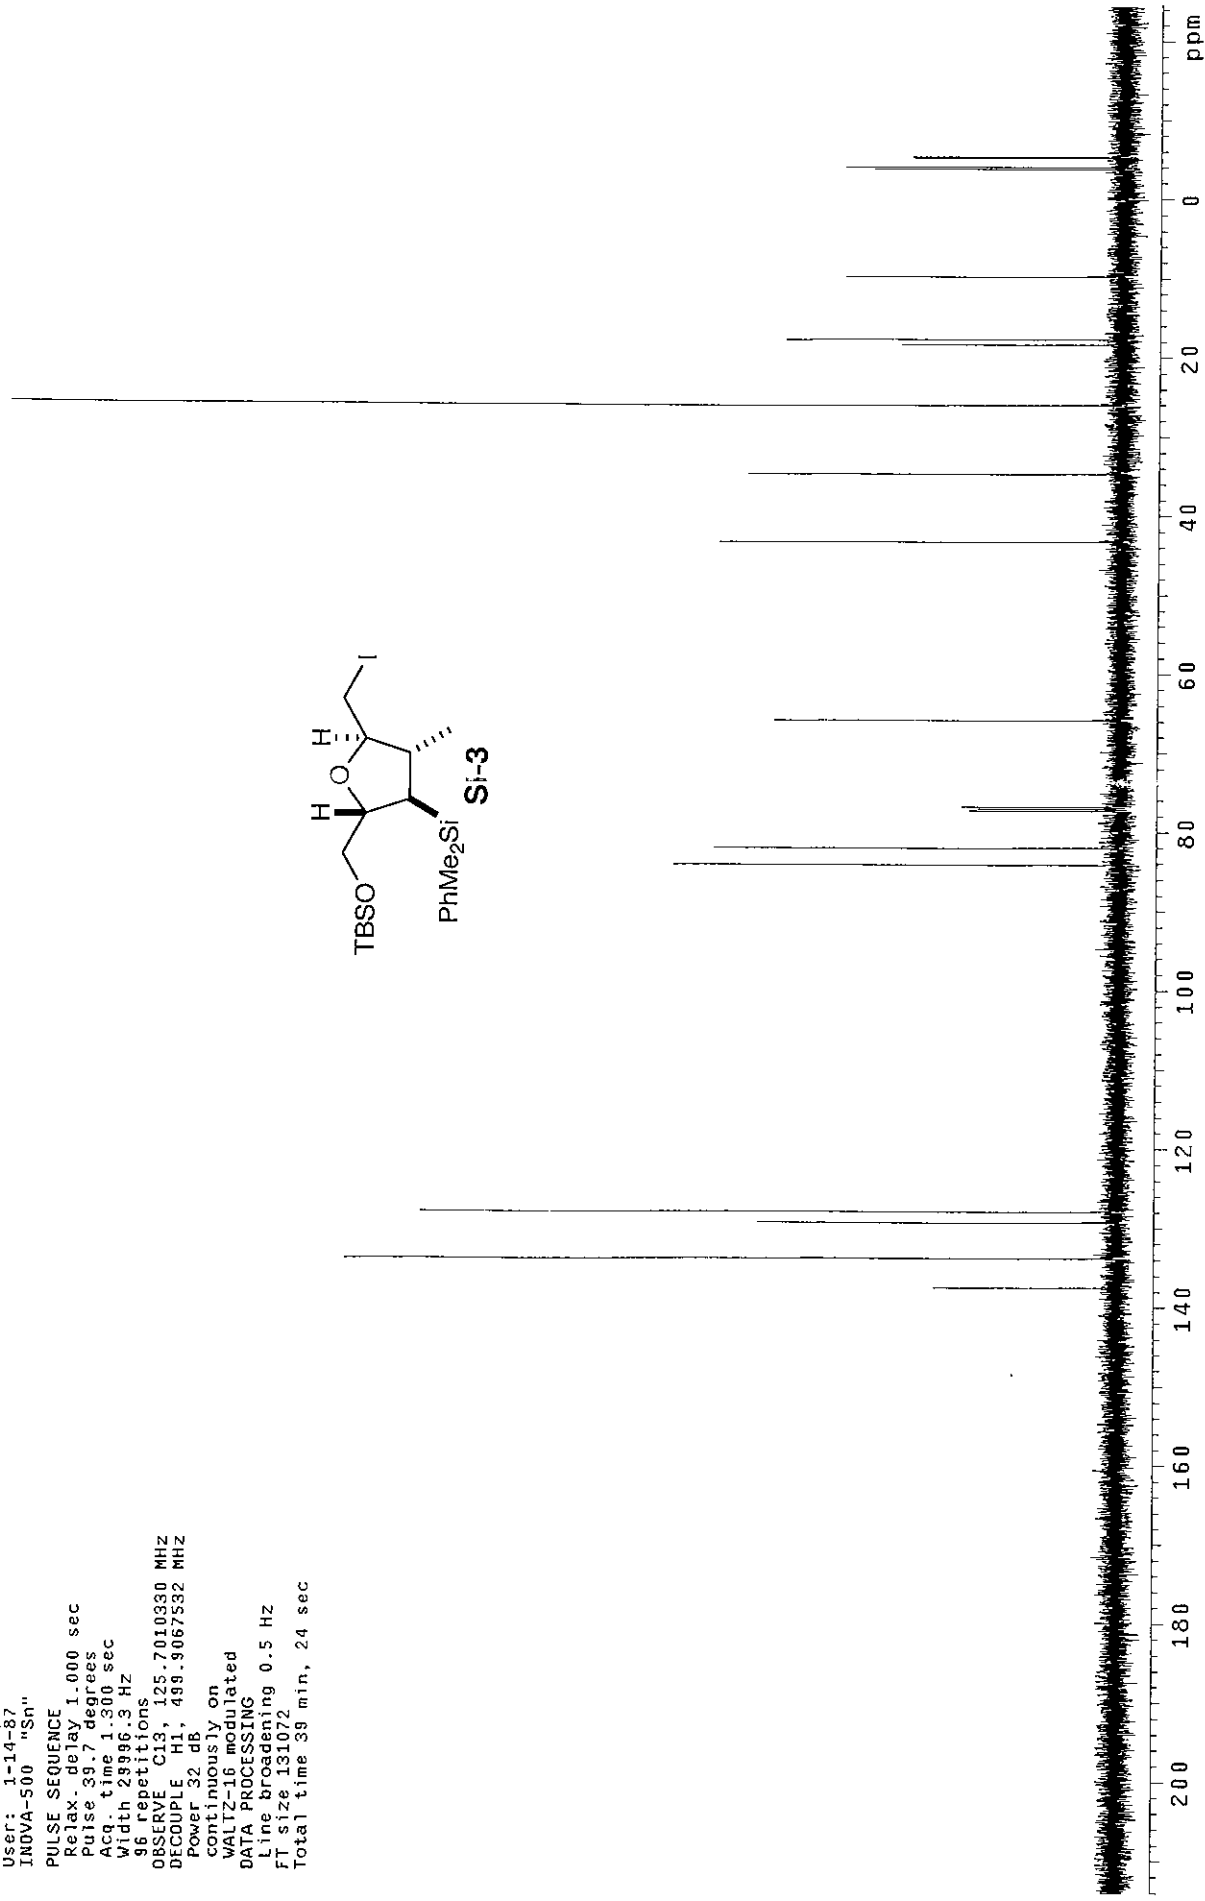



## STANDARD CARBON PARAMETERS

Pulse Sequence: s2pul  
Solvent: CDCl3  
Ambient temperature  
User: 1-14-87  
INDVA-500 "Sn"  
PULSE SEQUENCE  
Relax. delay 1.000 sec  
Pulse 39.7 degrees  
Acq. time 1.300 sec  
Width 29996.3 Hz  
256 repetitions  
OBSERVE C13, 125.7009946 MHZ  
DECOUPLE H1, 499.9067532 MHZ  
Power 32 dB,  
continuously on  
WALTZ-16 modulated  
DATA PROCESSING  
Line broadening 0.5 Hz  
FT size 131072  
Total time 39 min, 24 sec

SI-12

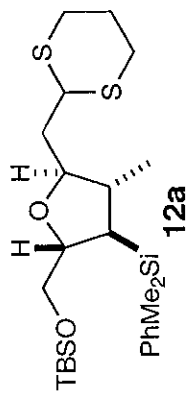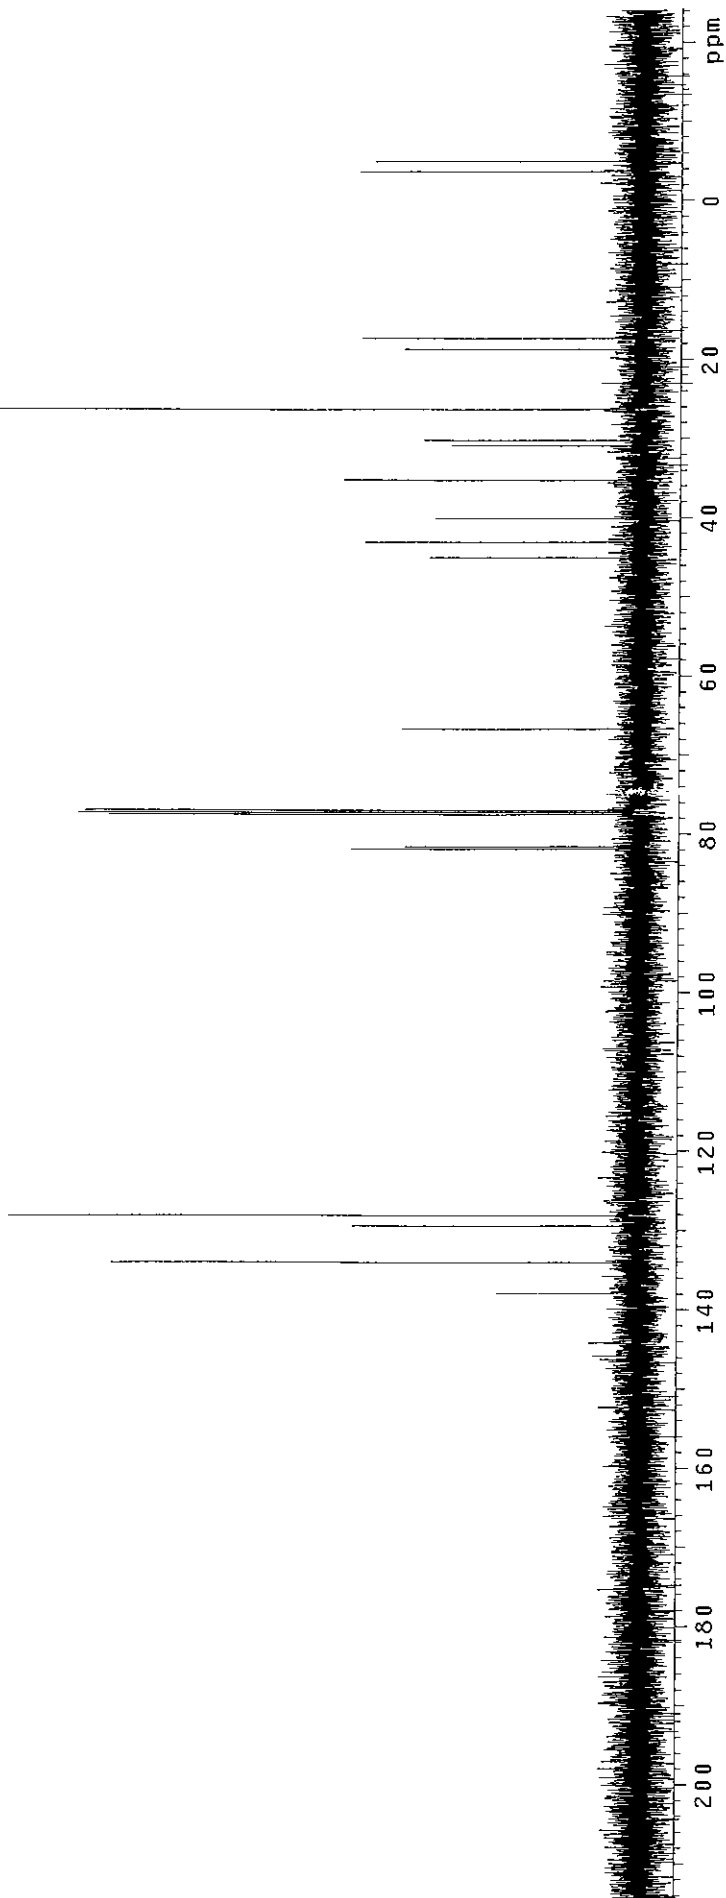

STANDARD PROTON PARAMETERS

Pulse Sequence: s2pu1  
Solvent: CDC13  
Ambient temperature  
INOVA-500 "Sp"  
PULSE SEQUENCE  
Relax delay 1.000 sec  
Pulse 44.6 degrees  
Acq time 2.500 sec  
Width 8000.0 Hz  
16 repetitions  
OBSERVE H1, 499.9042537 MHz  
DATA PROCESSING  
FT size 65536  
Total time 0 min, 56 sec

SI-13

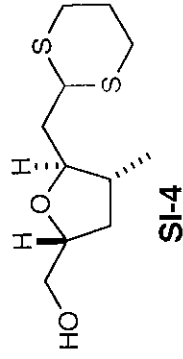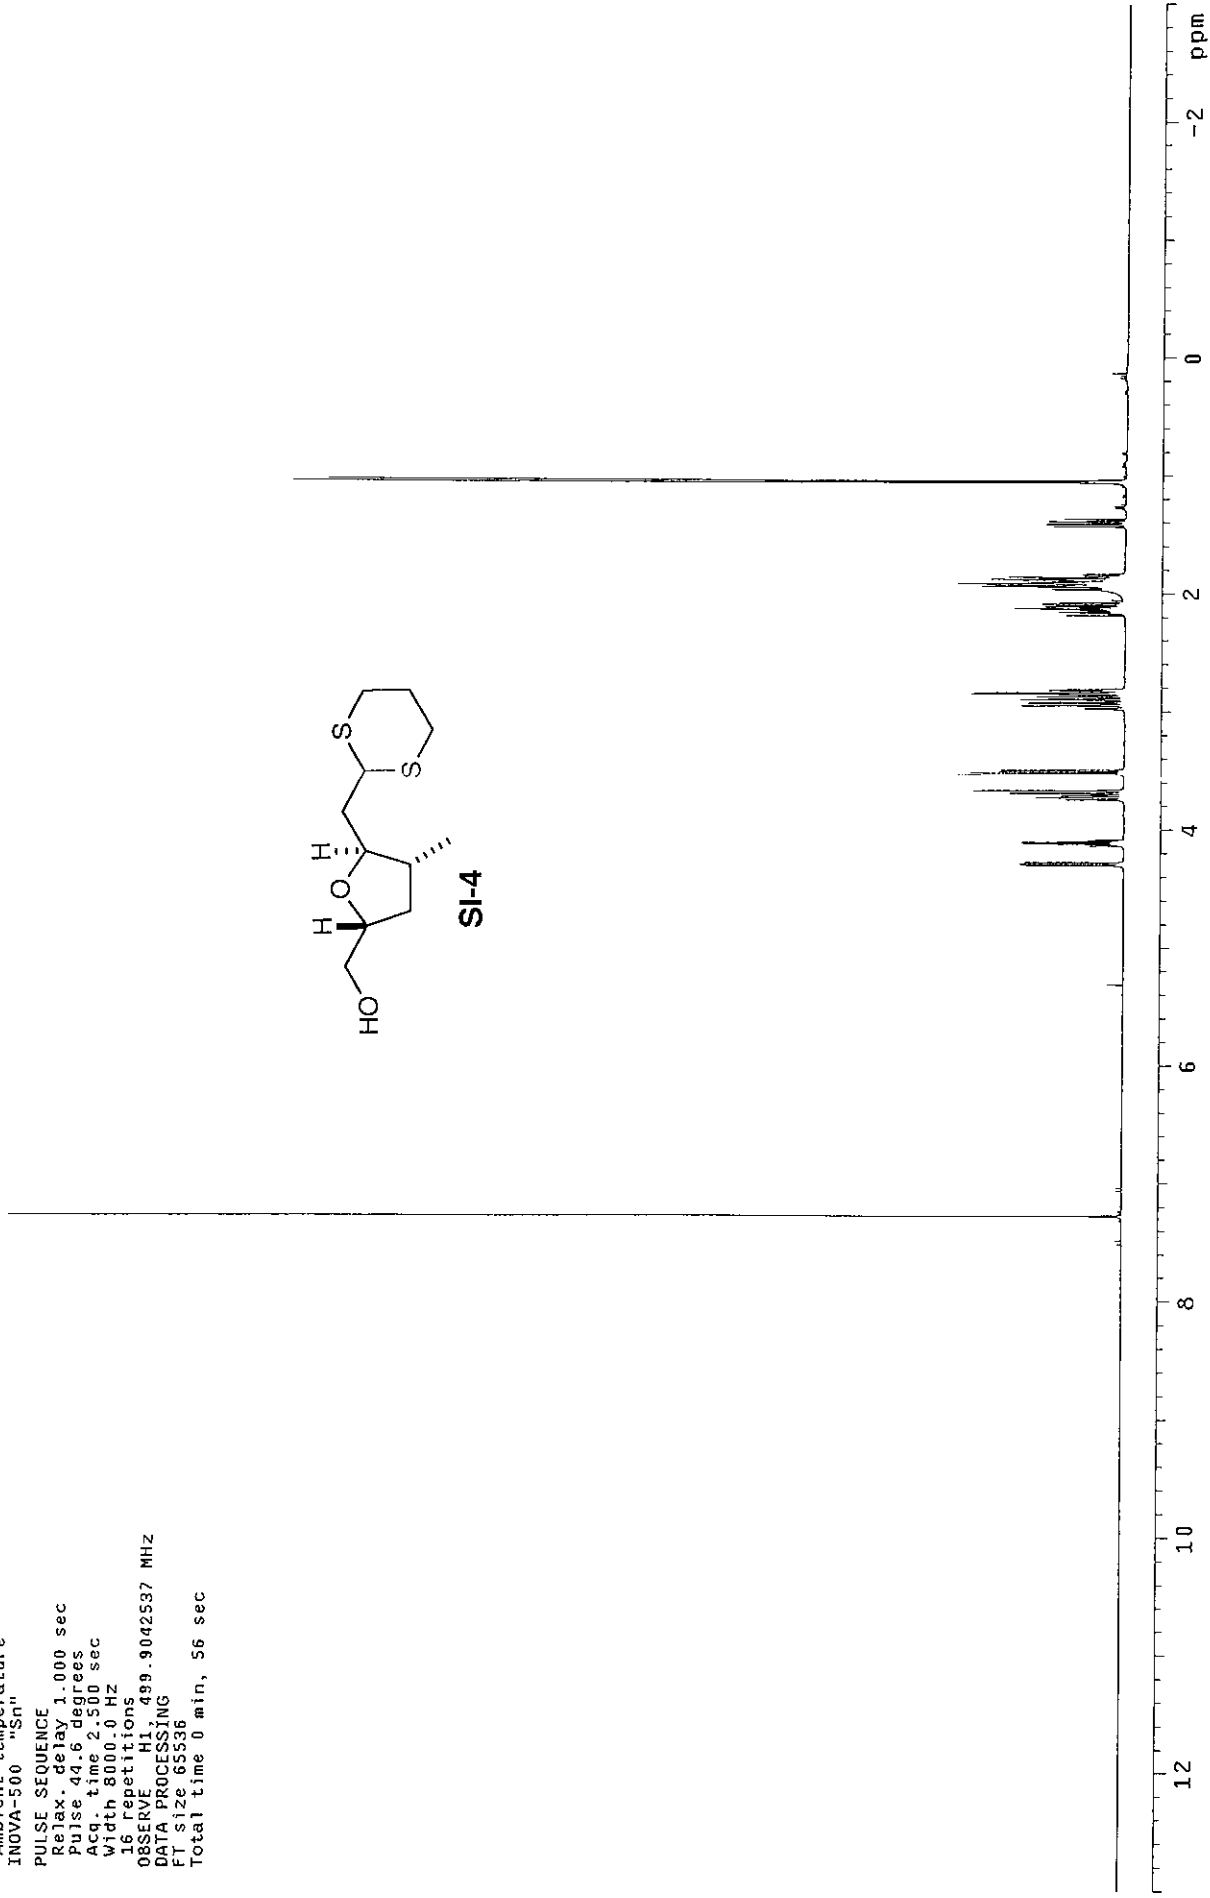

STANDARD CARBON PARAMETERS

Pulse Sequence: s2pu1  
Solvent: CDCl3  
Ambient temperature  
User: 1-14-87  
INOVA-500 "S"n"

PULSE SEQUENCE

Relax. delay 1.000 sec  
Pulse 39.7 degrees  
Acq. time 1.300 sec  
Width 29996.3 Hz  
64 repetitions  
OBSERVE C13, 125.7010348 MHz  
DECOUPLE H1, 499.9067532 MHz  
Power 32 dB  
continuously on  
WALTZ-16 modulated  
DATA PROCESSING  
Line broadening 0.5 Hz  
F1 size 131072  
Total time 39 min, 24 sec

SI-14

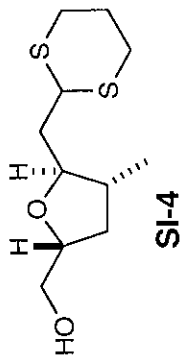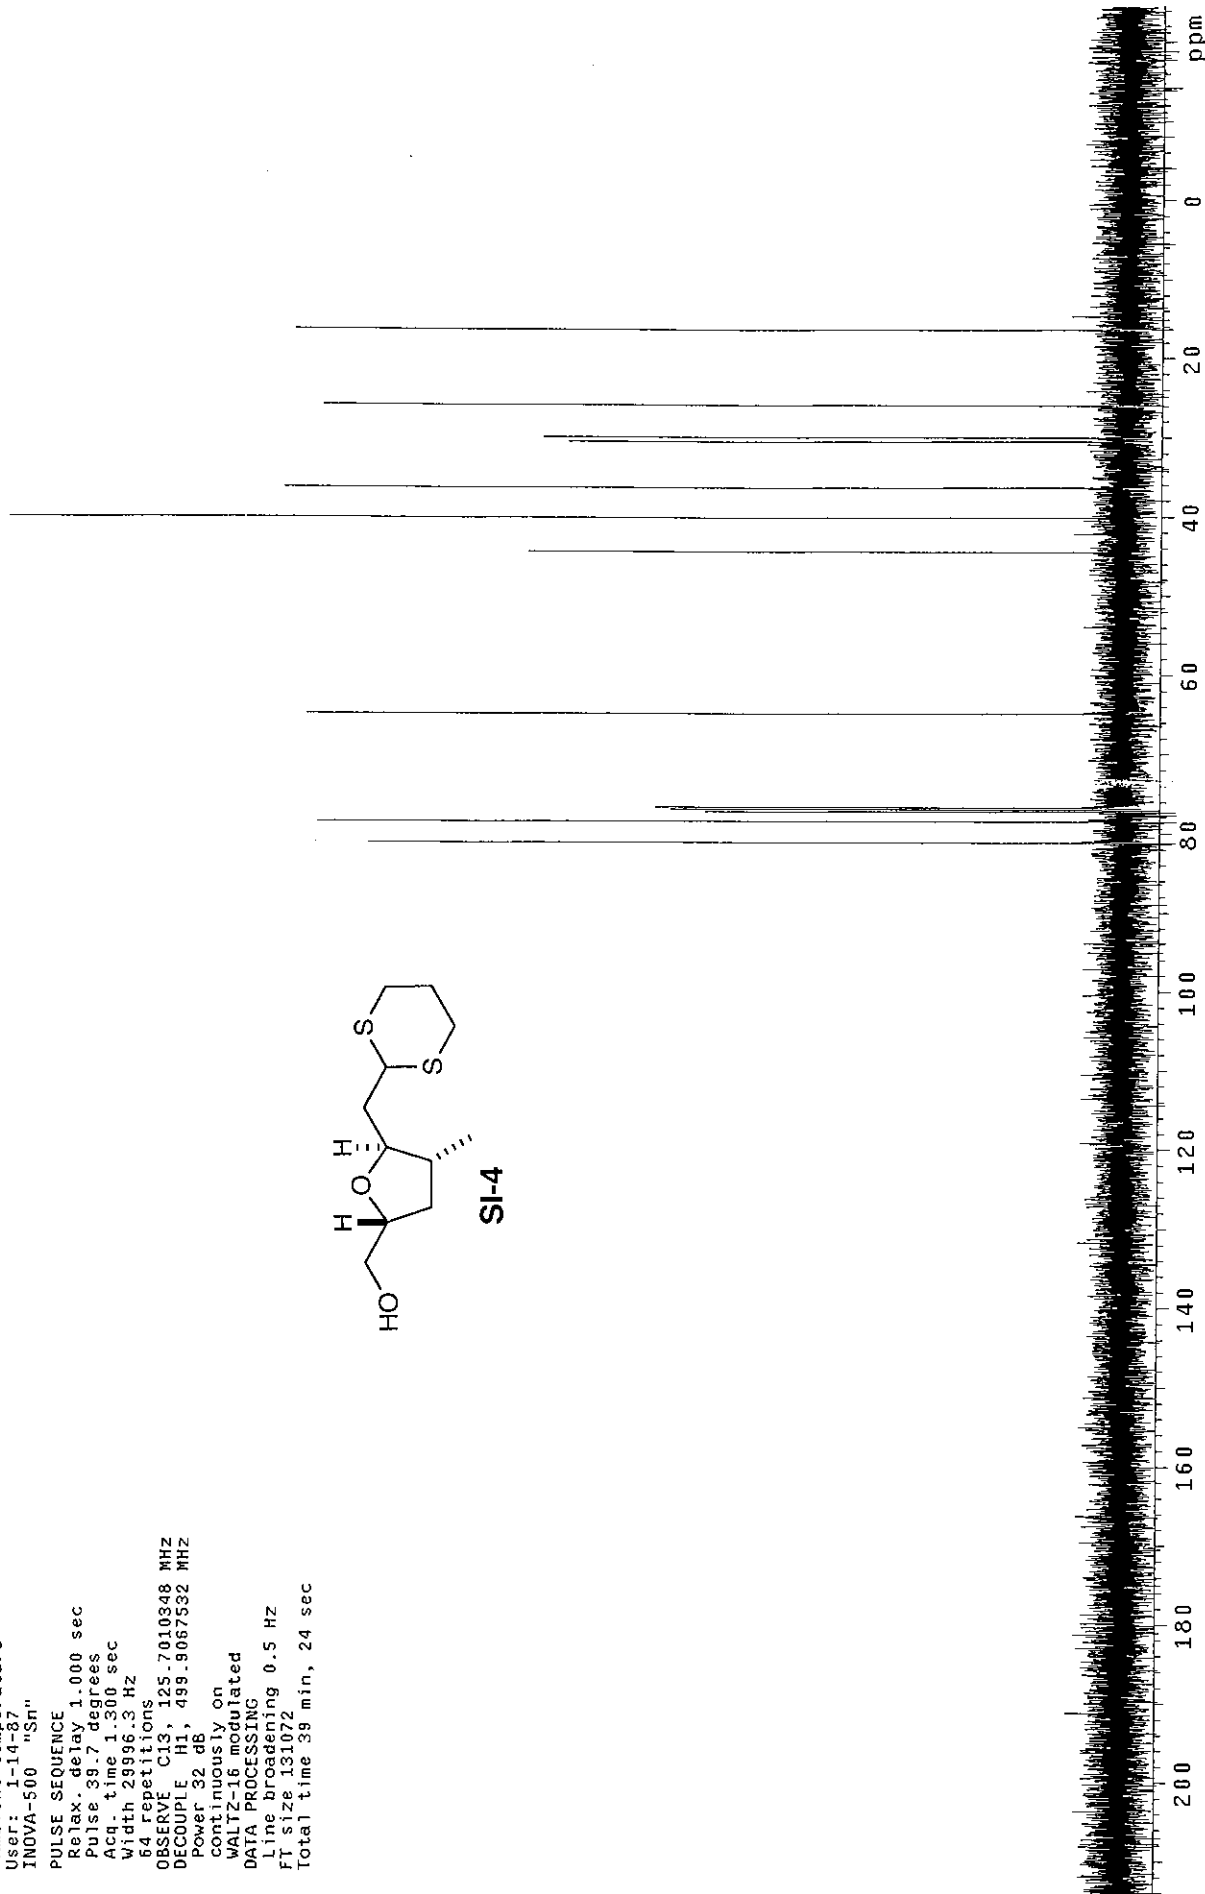

STANDARD PROTON PARAMETERS

Pulse Sequence: s2pu1  
Solvent: CDCl3  
Ambient temperature  
INOVA-500 "Sh"  
PULSE SEQUENCE  
Relax. delay 1.000 sec  
Pulse 45.0 degrees  
Acq. time 2.500 sec  
Width 8000.0 Hz  
16 repetitions  
OBSERVE HI, 499.9042537 MHZ  
DATA PROCESSING  
F1 size 65536  
Total time 0 min, 56 sec

SI-15

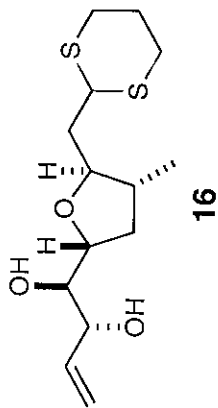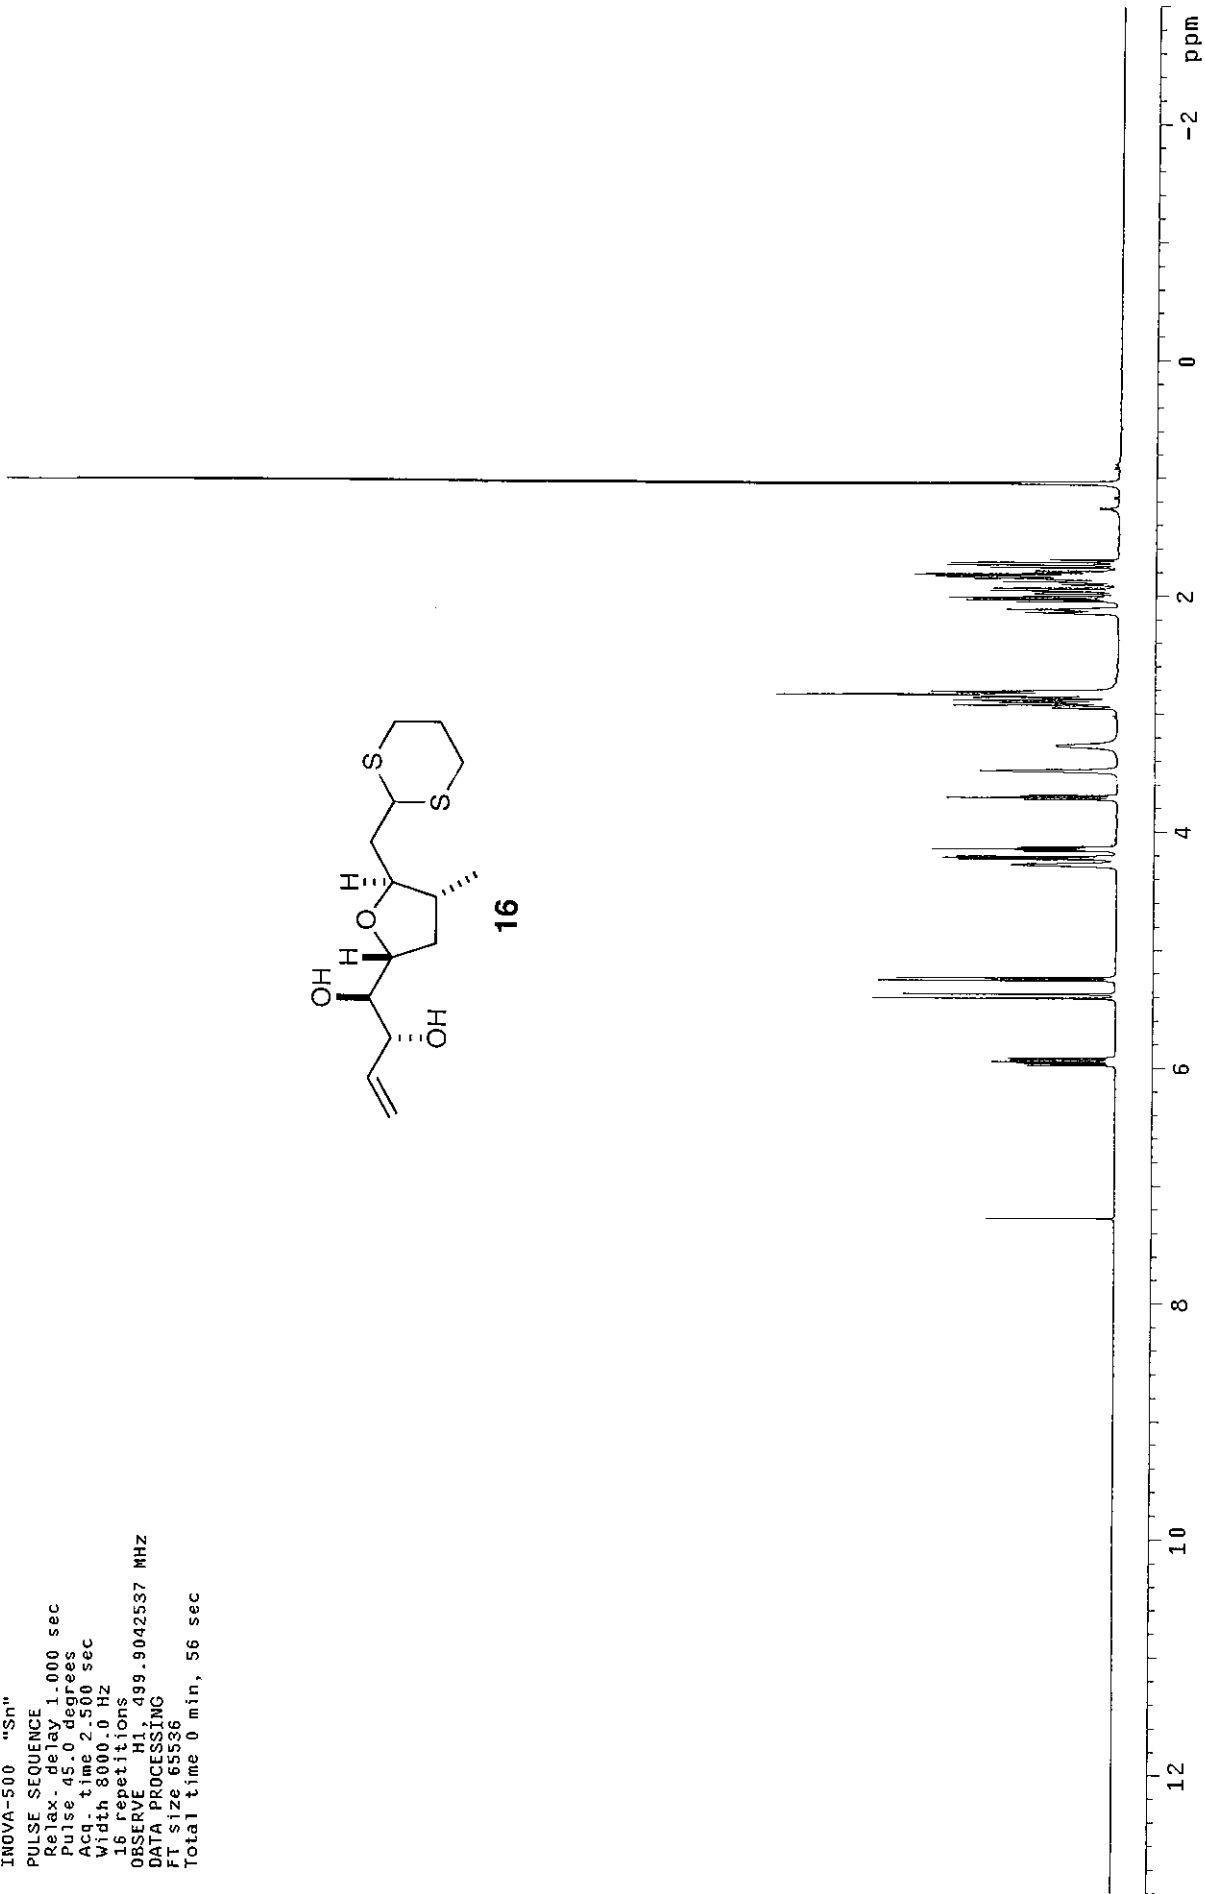

STANDARD CARBON PARAMETERS

Pulse Sequence: s2pu1  
 Solvent: CDC13  
 Ambient temperature  
 User: 1-14-87  
 INOVA-500 "Sn"

PULSE SEQUENCE  
 Relax. delay 1.000 sec  
 Pulse 40.0 degrees  
 Acq. time 1.300 sec  
 Width 29996.3 Hz  
 192 repetitions  
 OBSERVE C13, 125.7009946 MHZ  
 DECOUPLE H1, 499.9067532 MHZ  
 Power 33 dB,  
 continuously on  
 WALTZ-16 modulated  
 DATA PROCESSING  
 Line broadening 0.5 Hz  
 FT size 131072  
 Total time 6 hr, 24 min, 51 sec

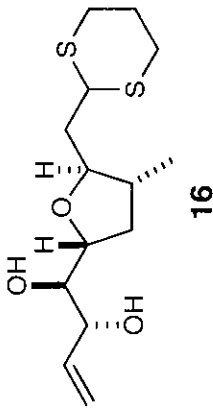

SI-16

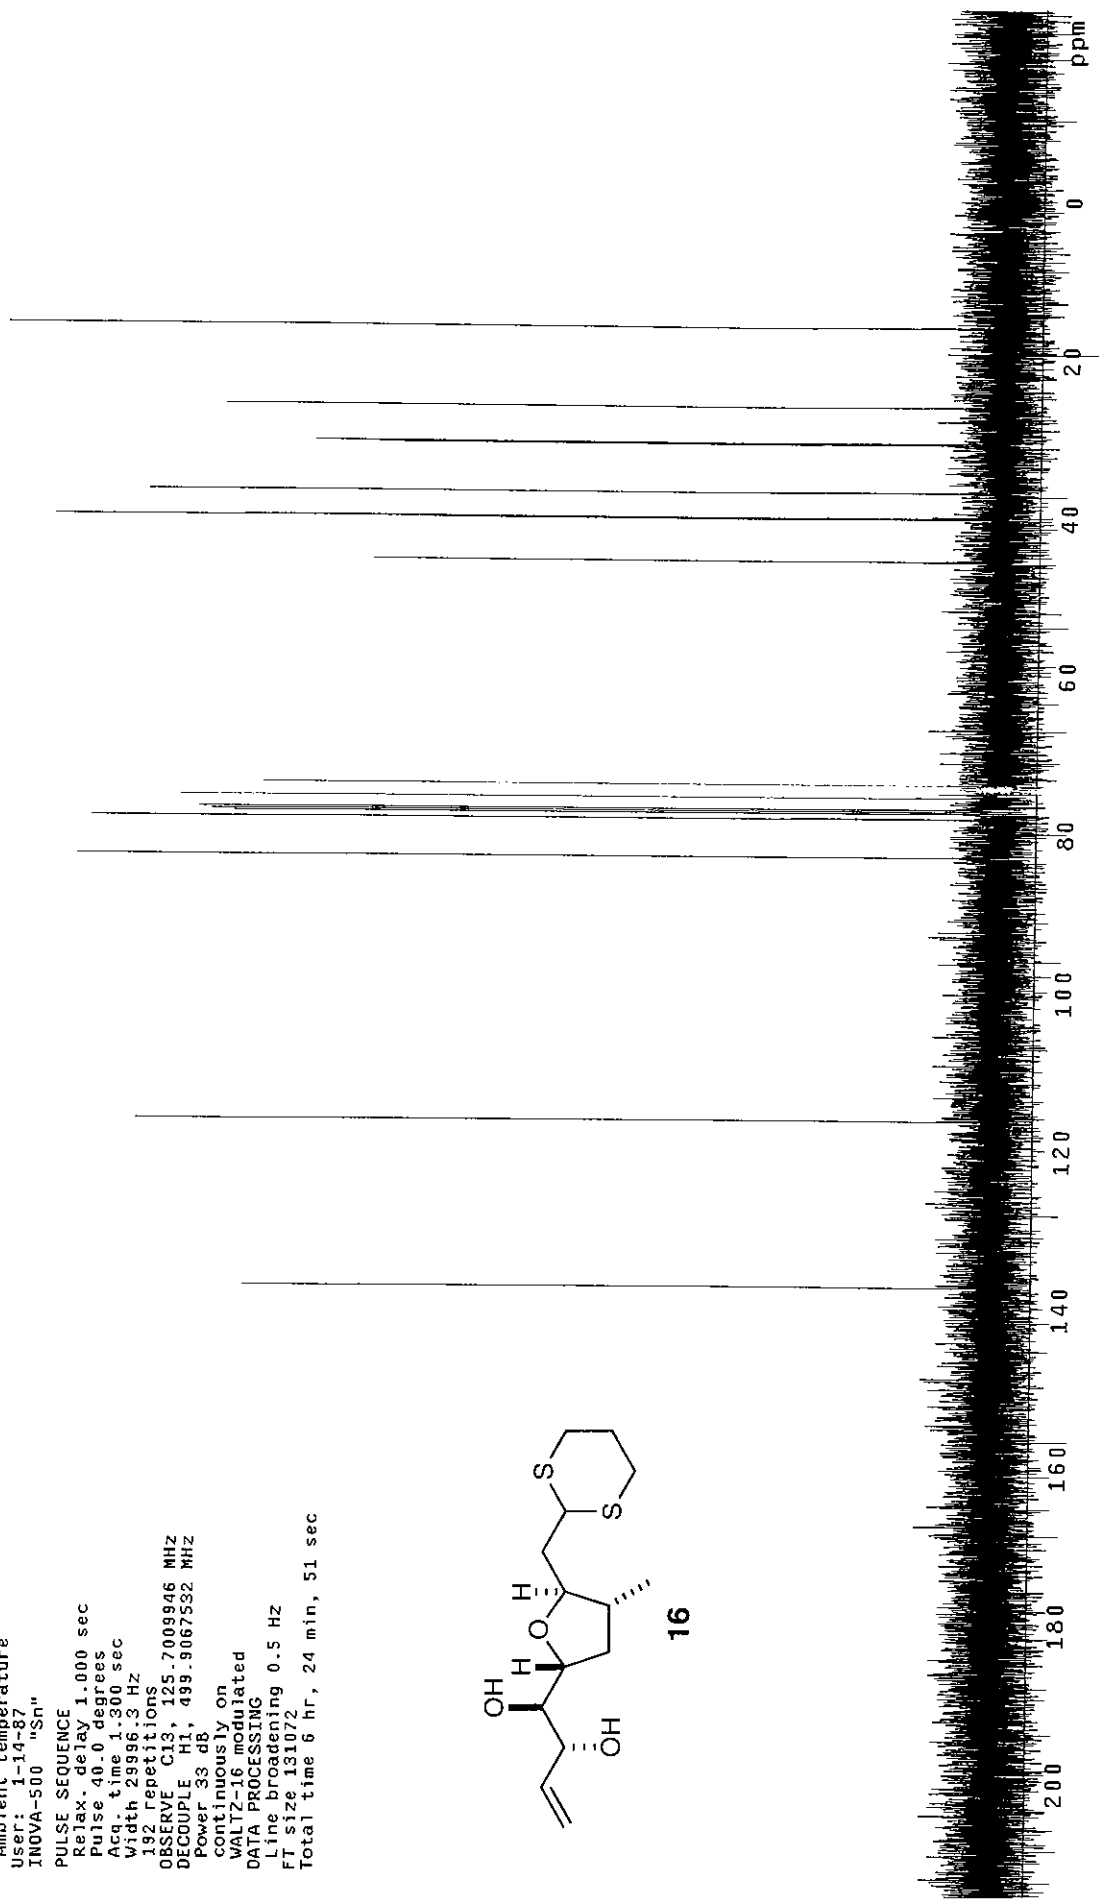



## STANDARD PROTON PARAMETERS

Pulse Sequence: s2pu1  
 Solvent: CDCl3  
 Ambient temperature  
 INOVA-500 "Sn"  
 PULSE SEQUENCE  
 Relax delay 1.000 sec  
 Pulse 44.6 degrees  
 Acq. time 2.500 sec  
 Width 8000.0 Hz  
 32 repetitions  
 OBSERVE H1, 499.9042537 MHZ  
 DATA PROCESSING  
 FT size 65536  
 Total time 3 min, 44 sec

SI-17

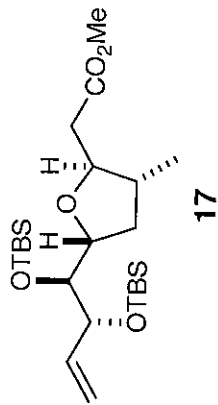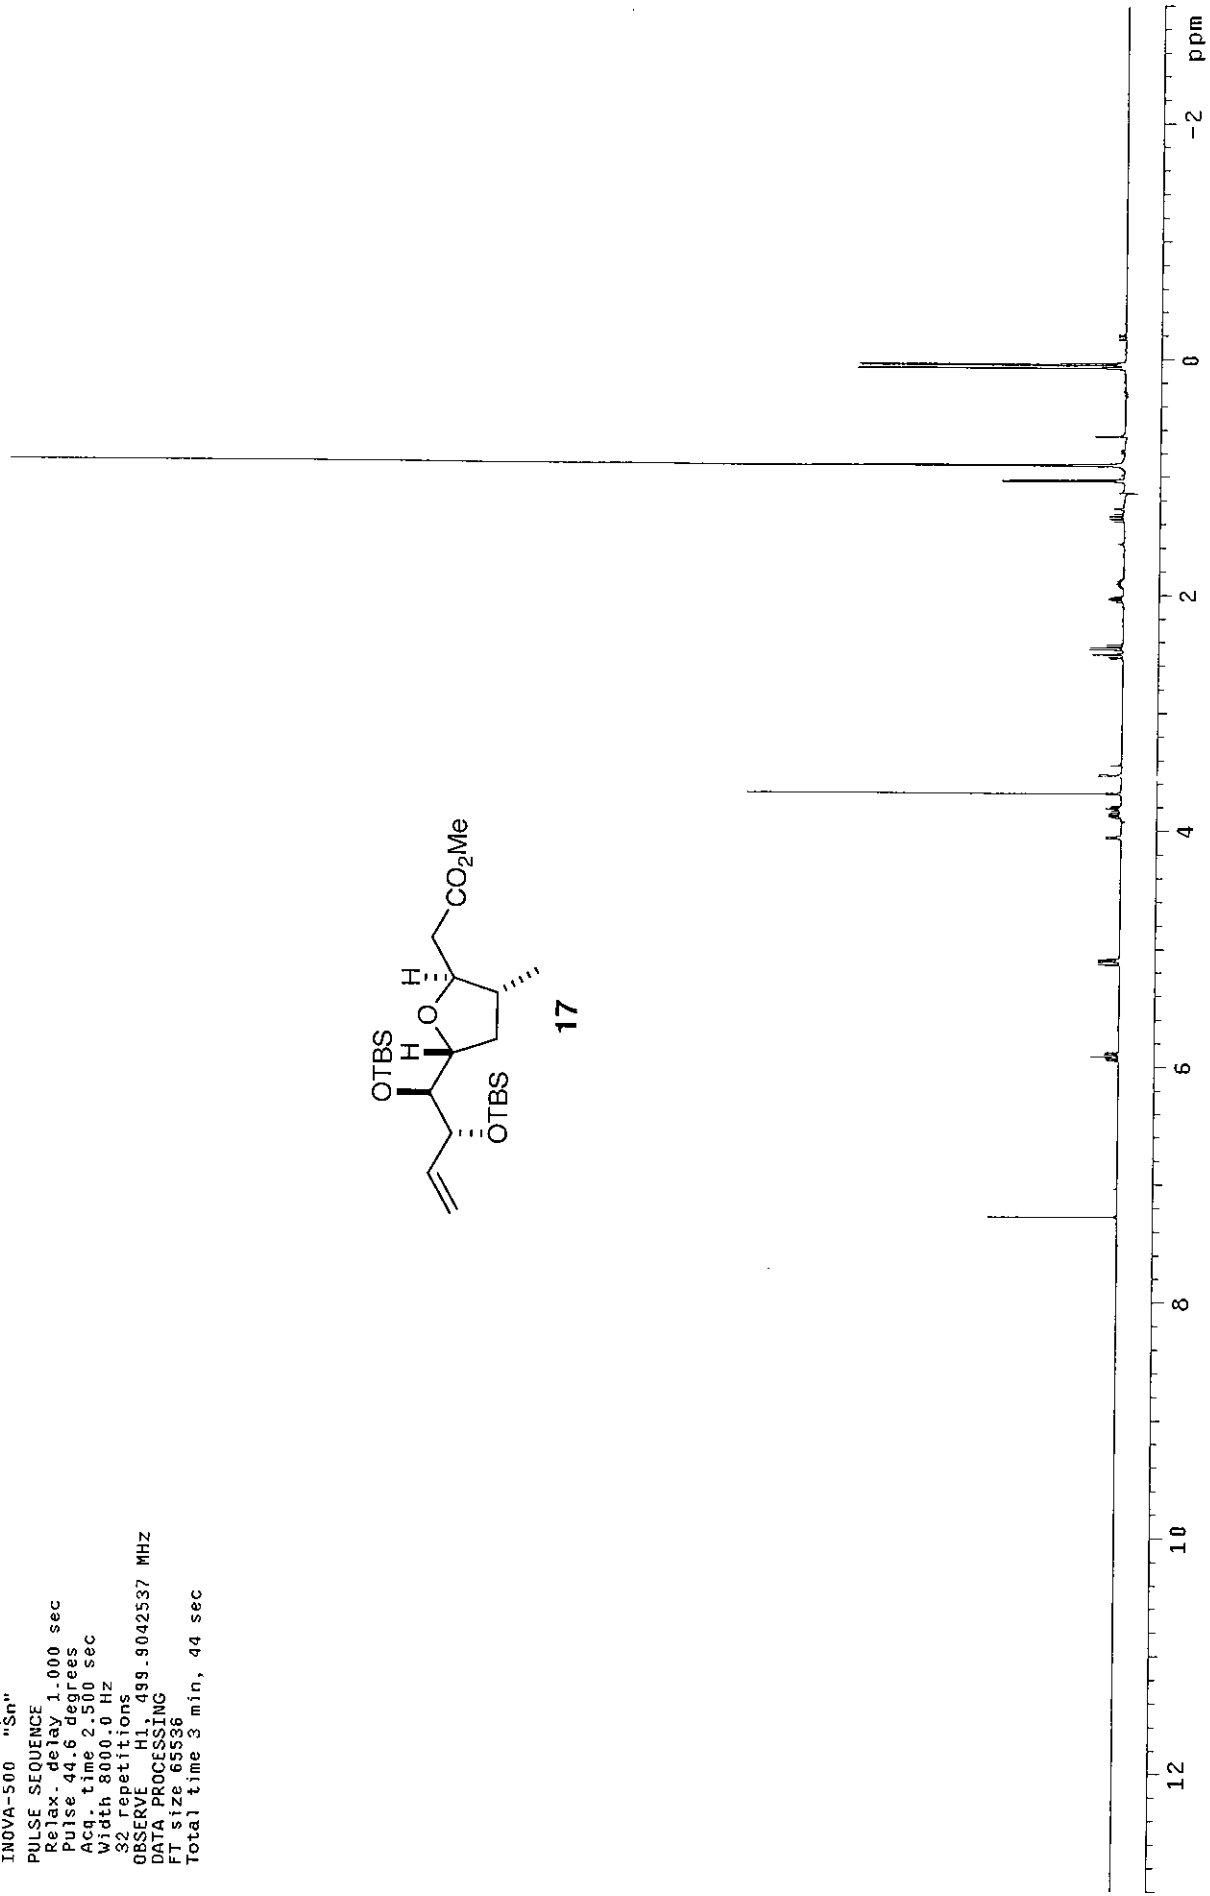

## STANDARD CARBON PARAMETERS

Pulse Sequence: s2pu1

Solvent: CDCl3

Ambient temperature

User: 1-14-87

File: char13CII-188

INOVA-500 "Kf"

## PULSE SEQUENCE

Relax. delay 1.000 sec

Pulse 39.7 degrees

Acq. time 1.300 sec

Width 29996.3 Hz

1408 repetitions

OBSERVE C13, 125.7009846 MHZ

DECUPLE H1, 499.9067532 MHZ

Power 32 dB

continuously on

WALTZ-16 modulated

DATA PROCESSING

Line broadening 0.5 Hz

FT size 131072

Total time 6 hr, 24 min, 51 sec

SI-18

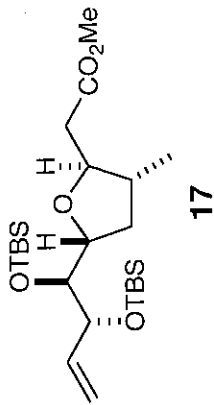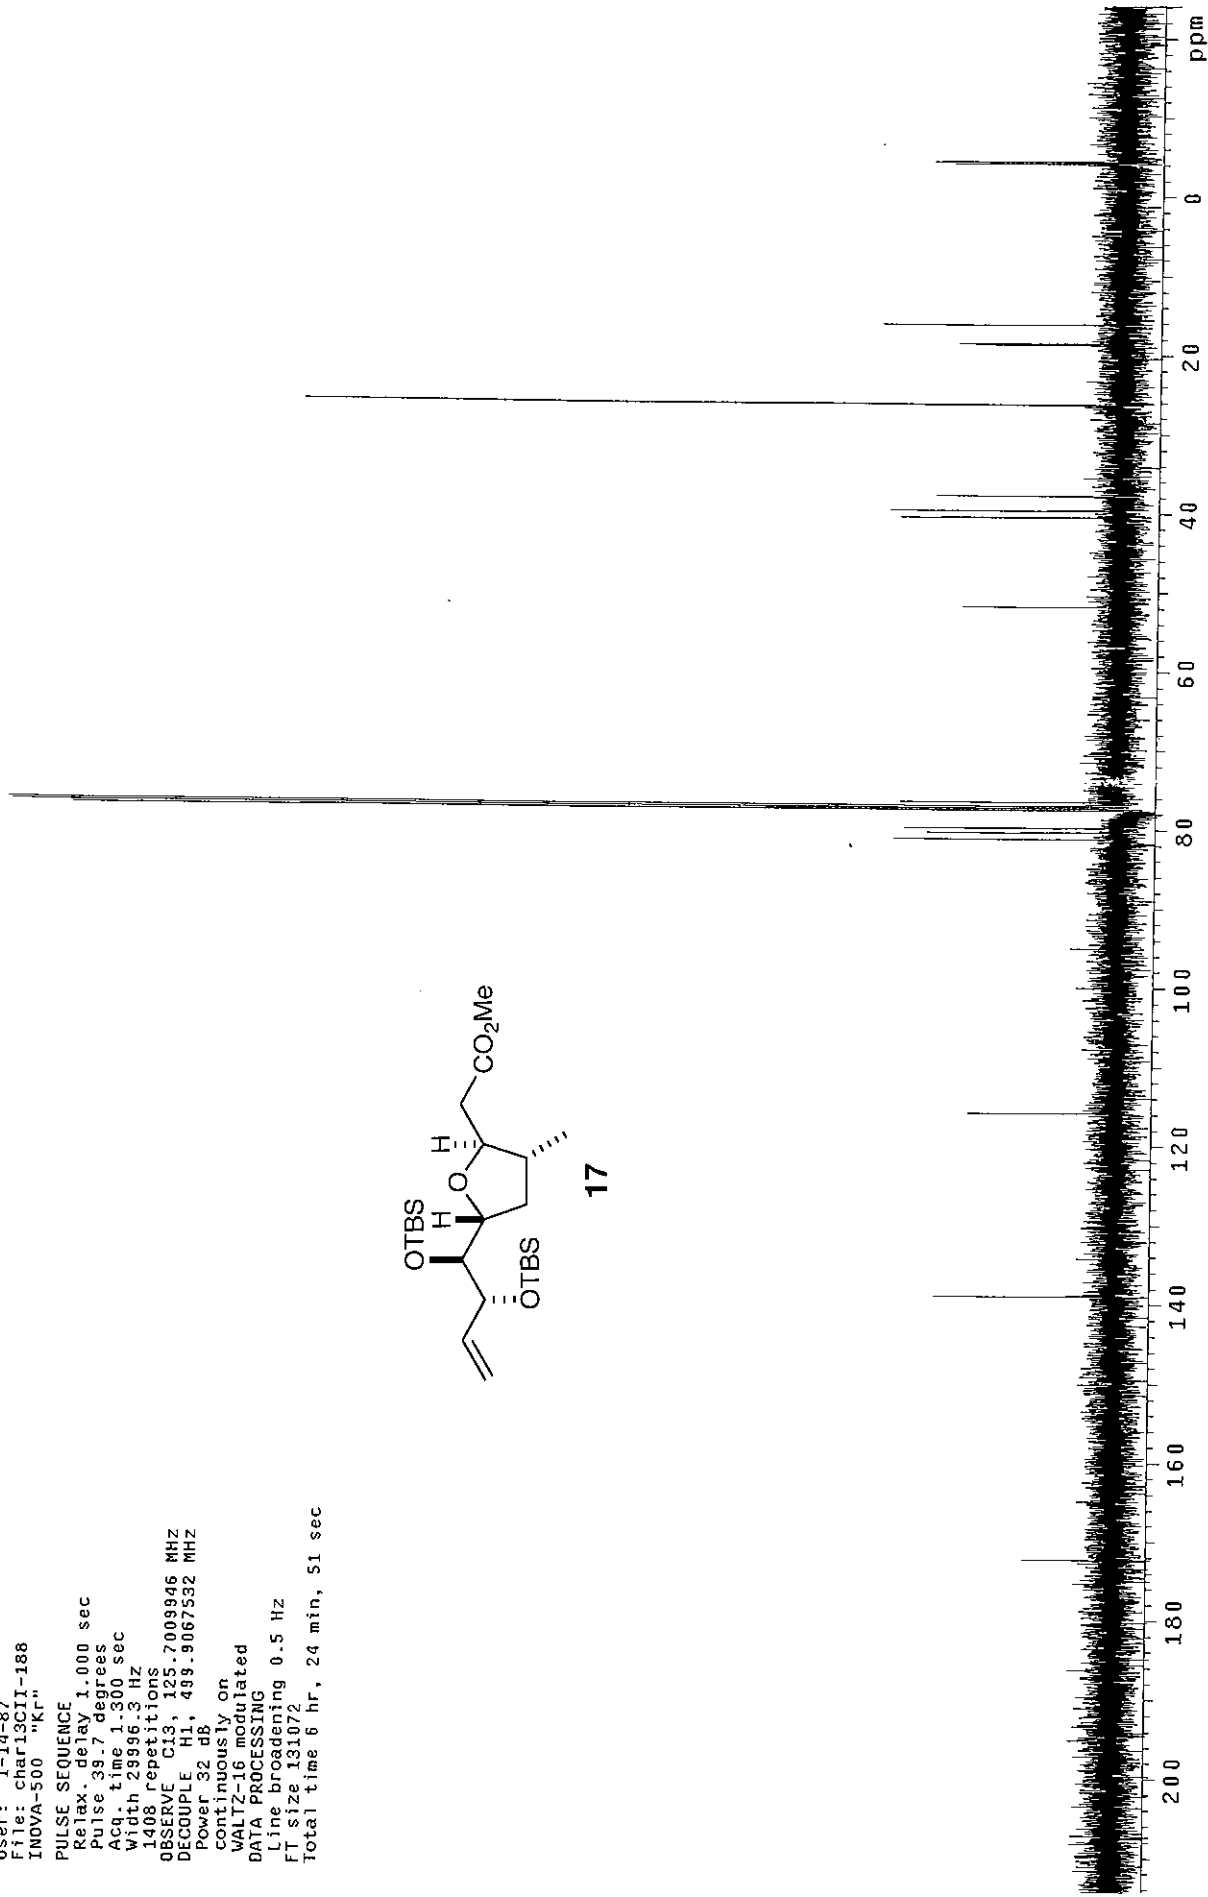

STANDARD PROTON PARAMETERS

Pulse Sequence: s2pu1  
Solvent: CDCl3  
Ambient temperature  
INOVA-500 "Sn"  
PULSE SEQUENCE  
Relax. delay 1.000 sec  
Pulse 44.6 degrees  
Acq. time 2.500 sec  
Width 8000.0 Hz  
8 repetitions  
OBSERVE H1, 499.9042555 MHZ  
DATA PROCESSING  
FT size 65536  
Total time 0 min, 56 sec

SI-19

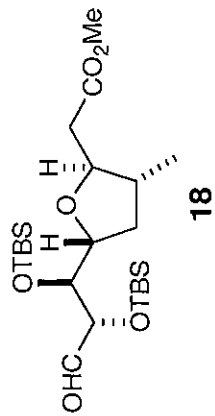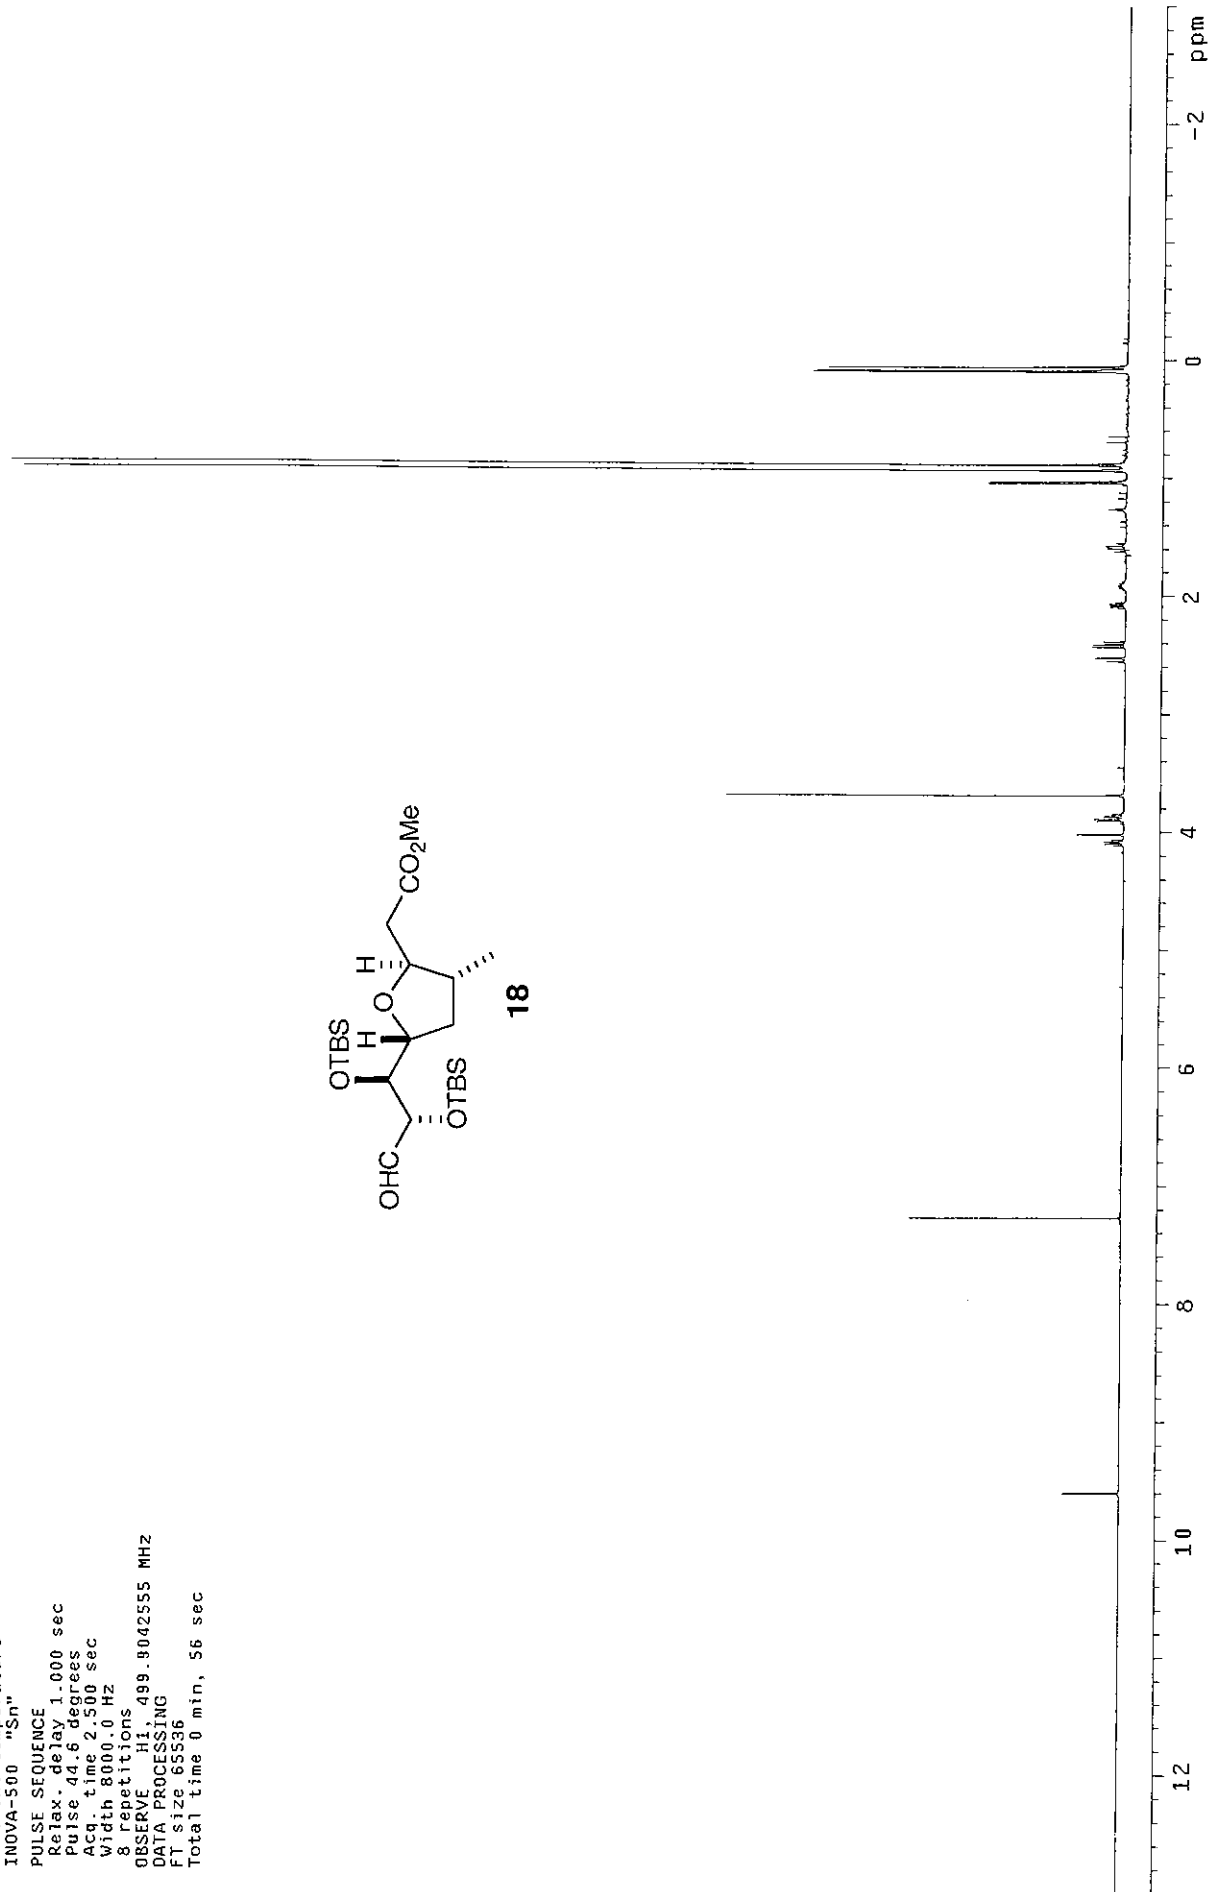

## STANDARD CARBON PARAMETERS

Pulse Sequence: s2pu1  
 Solvent: CDC13  
 Ambient temperature  
 User: i-14-87  
 INOVA-500 "Sn"  
 PULSE SEQUENCE  
 Relax delay 1.000 sec  
 Pulse 39.7 degrees  
 Acq. time 1.300 sec  
 Width 29996.3 Hz  
 14816 repetitions  
 OBSERVE C13, 125.7010257 MHz  
 DECOUPLE H1, 499.9067532 MHz  
 Power 32 dB  
 continuously on  
 WALTZ-16 modulated  
 DATA PROCESSING  
 Line broadening 0.5 Hz  
 FI size 131072  
 Total time 641 hr, 30 min, 1 sec

SI-20

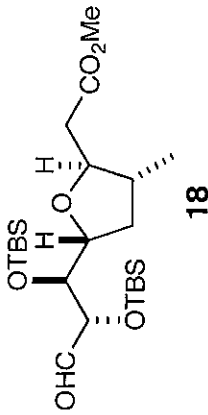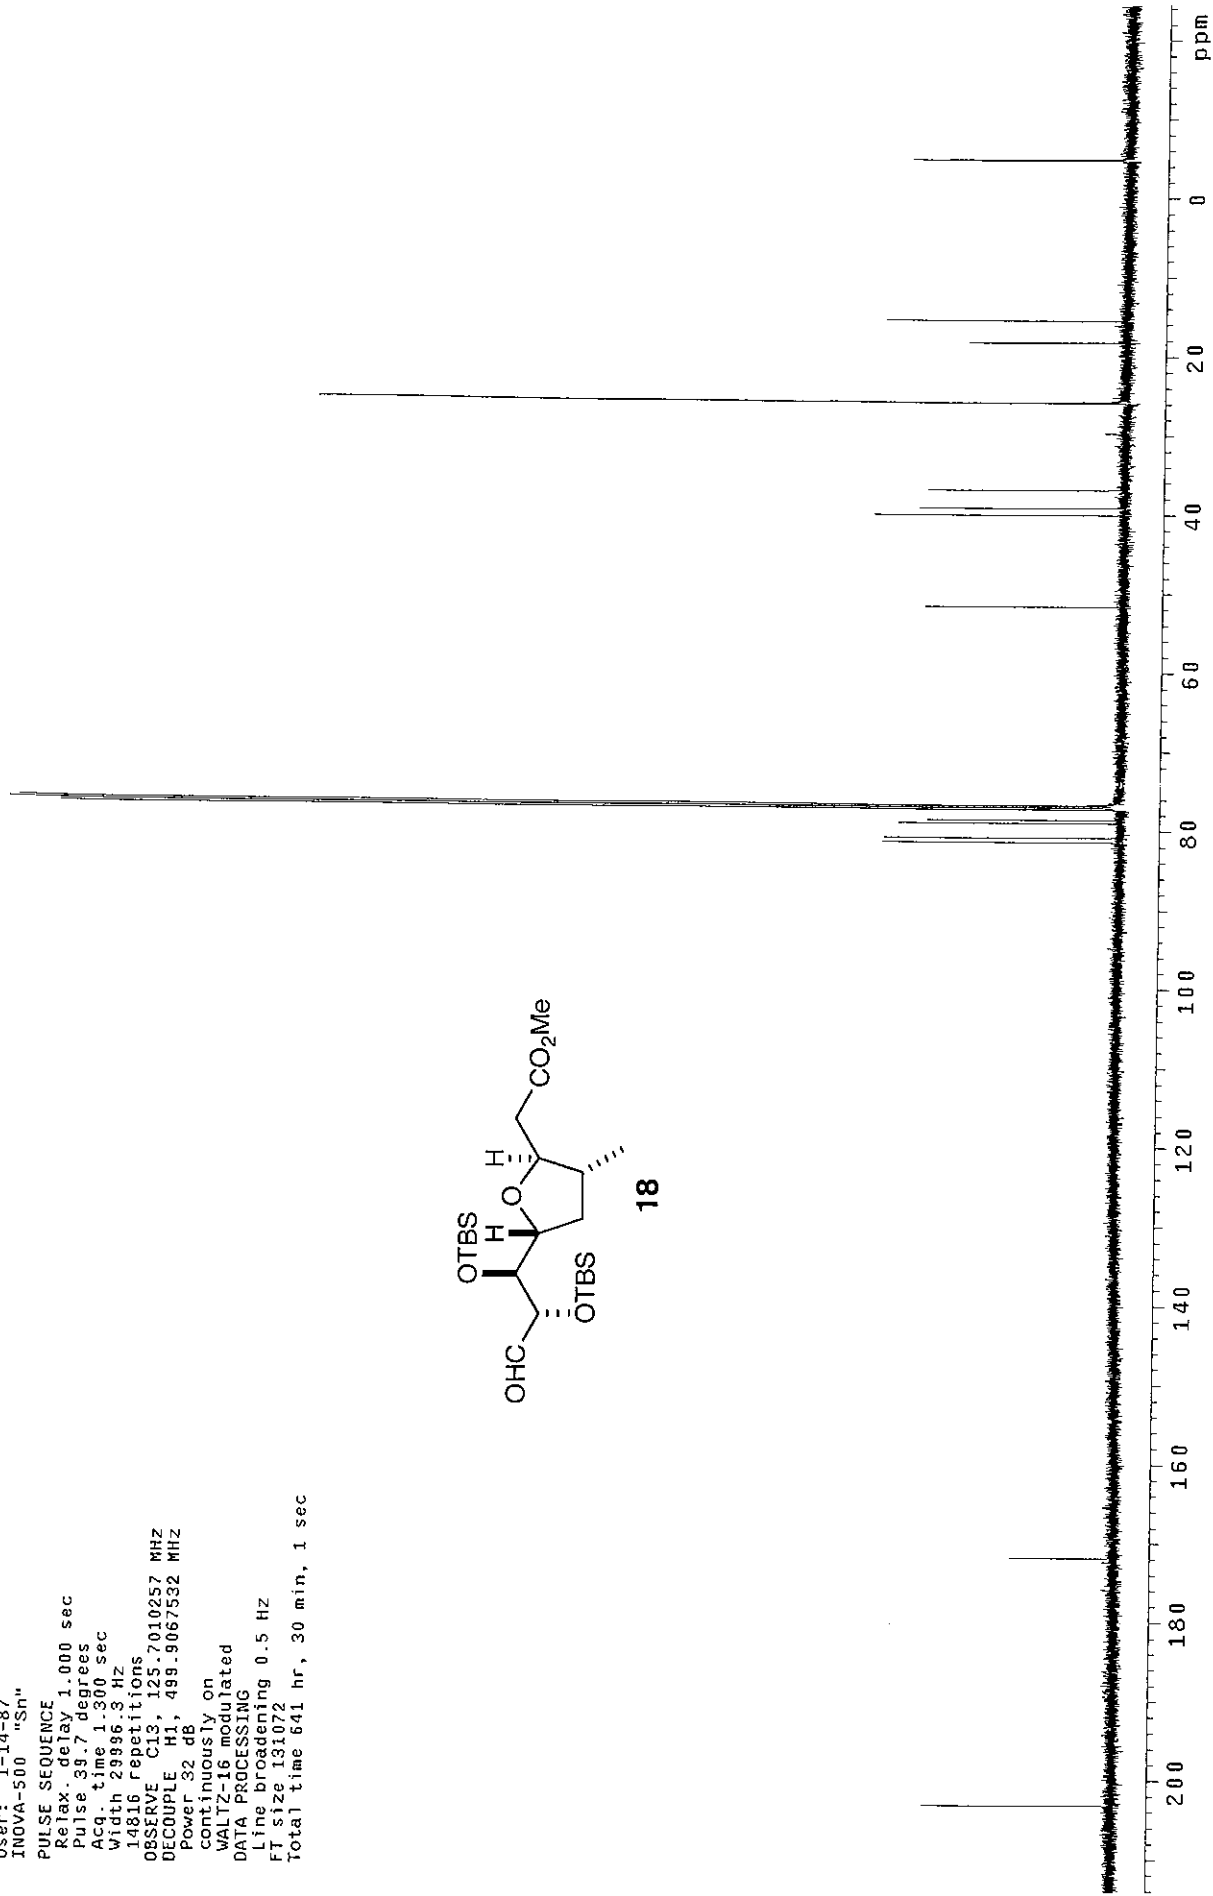

SI-21

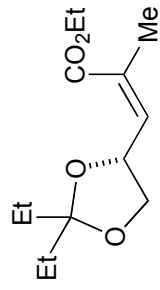

20

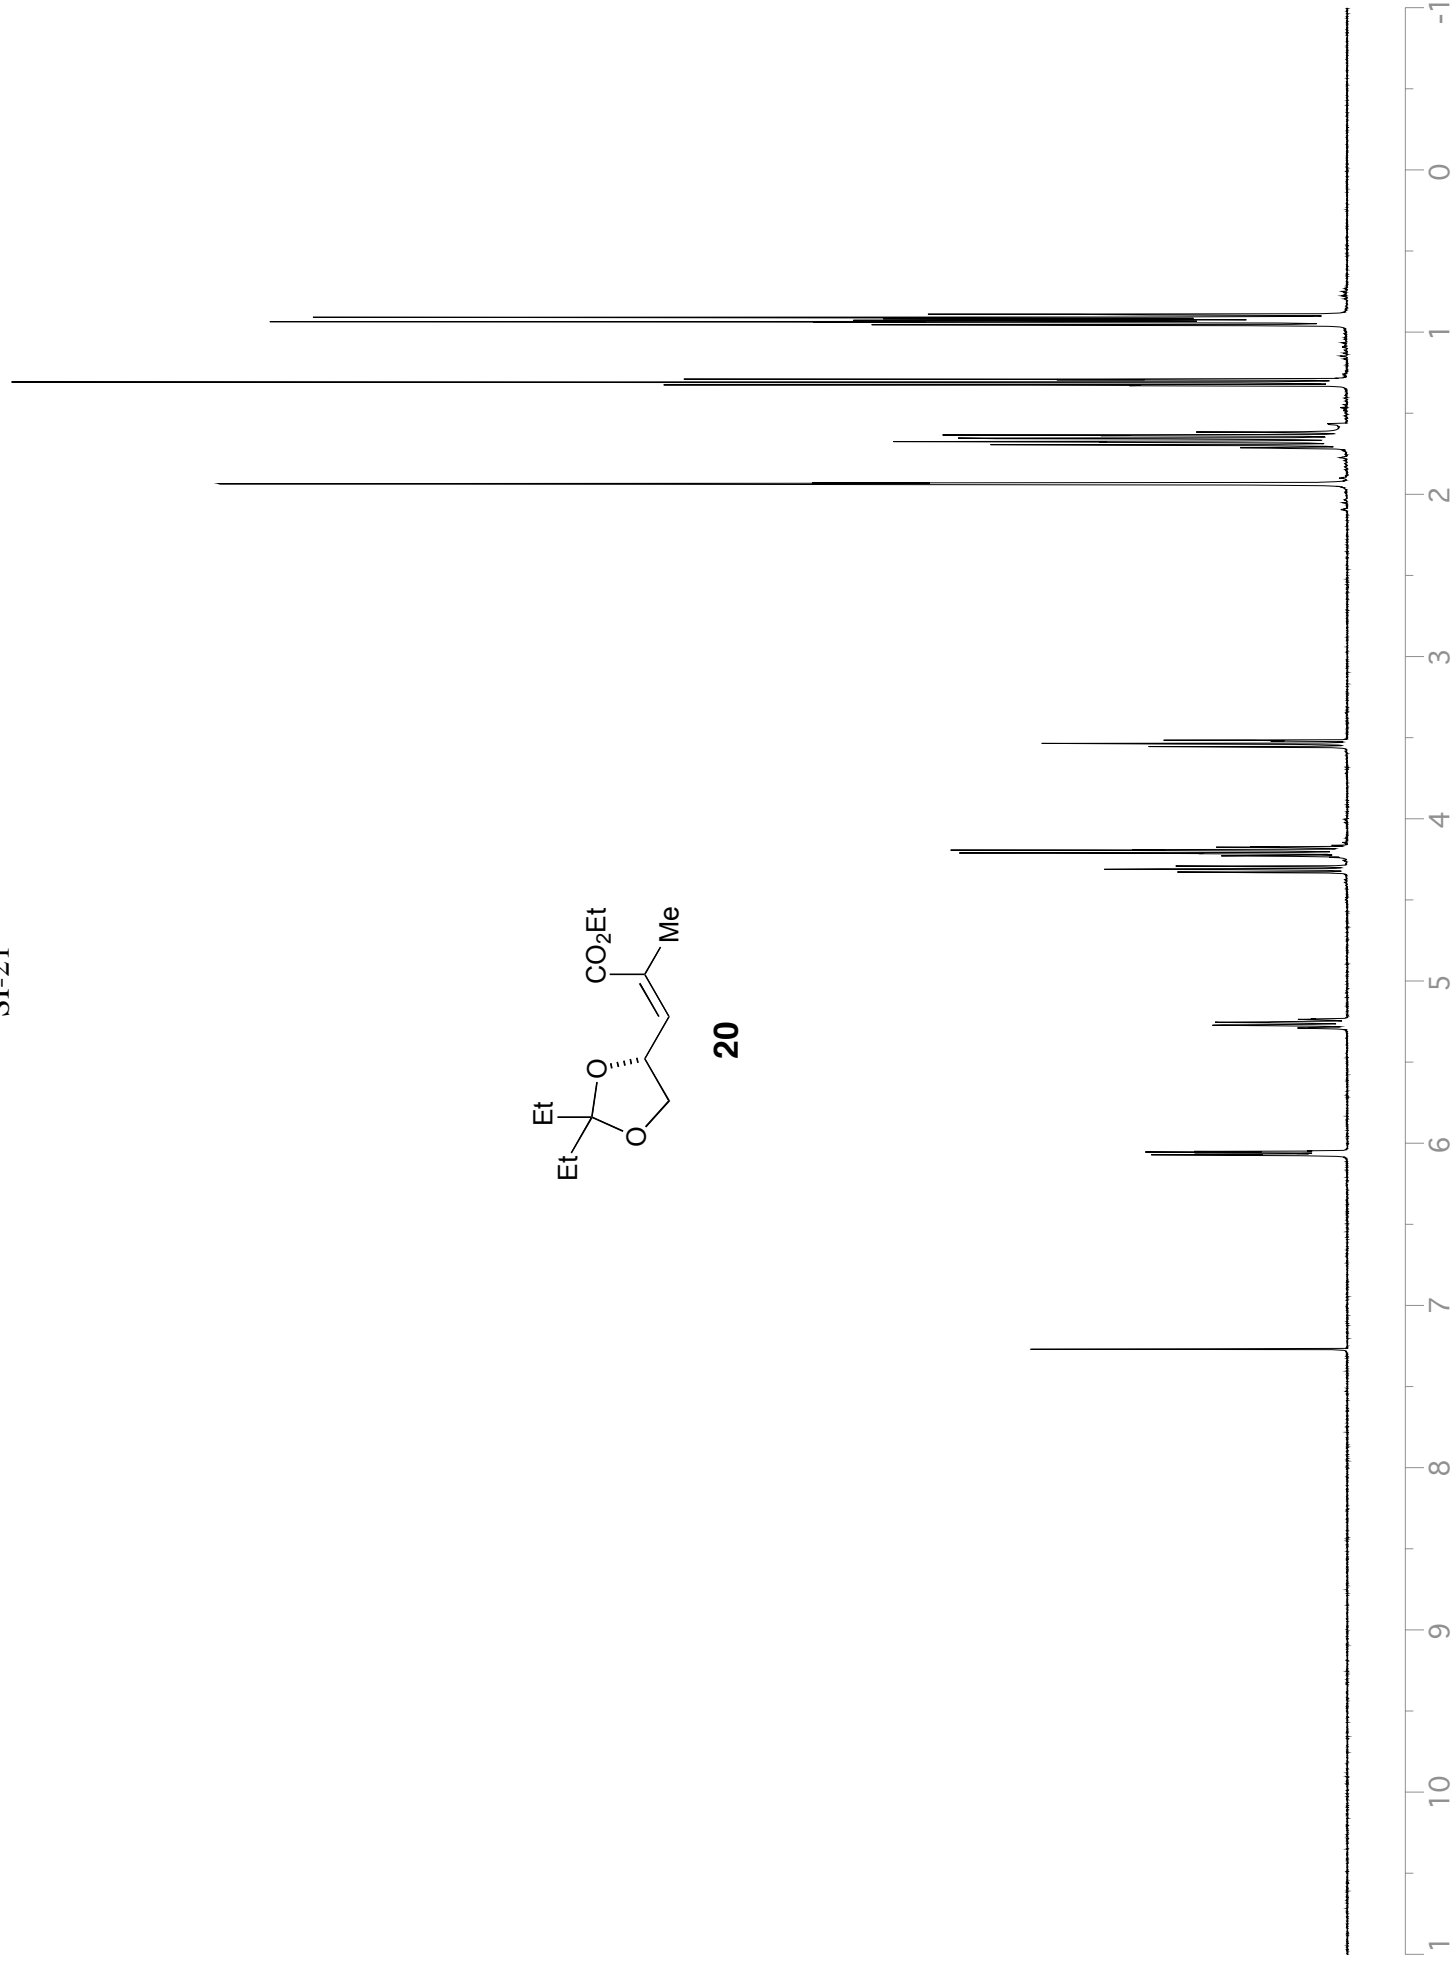

SI-22

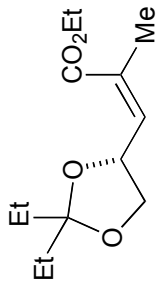

20

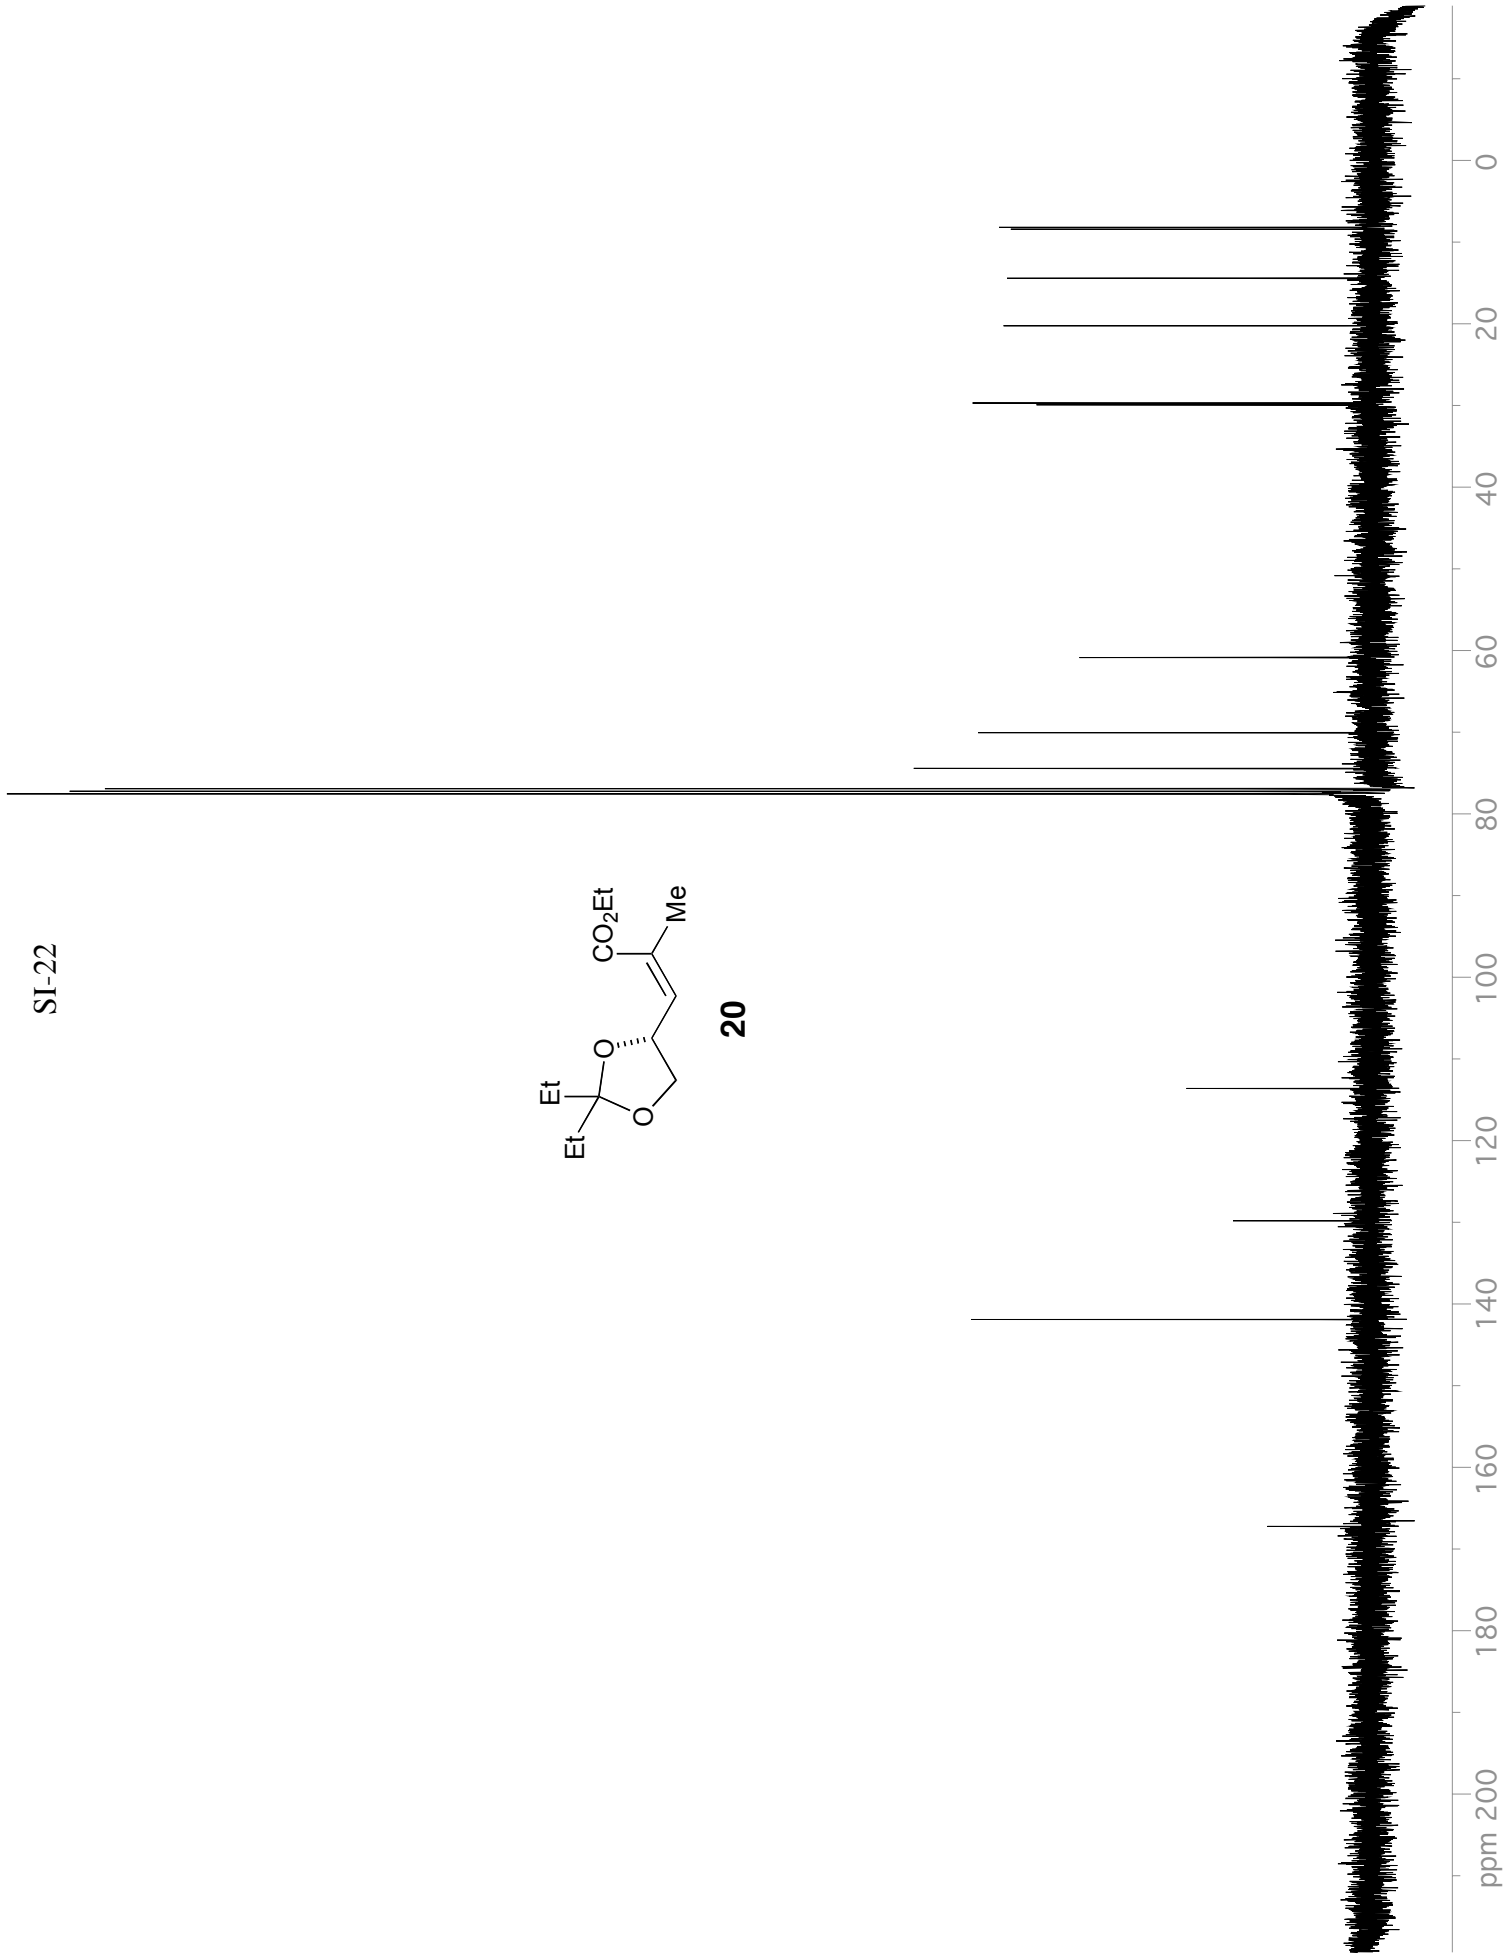

SI-23

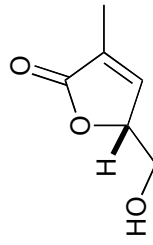

SI-6

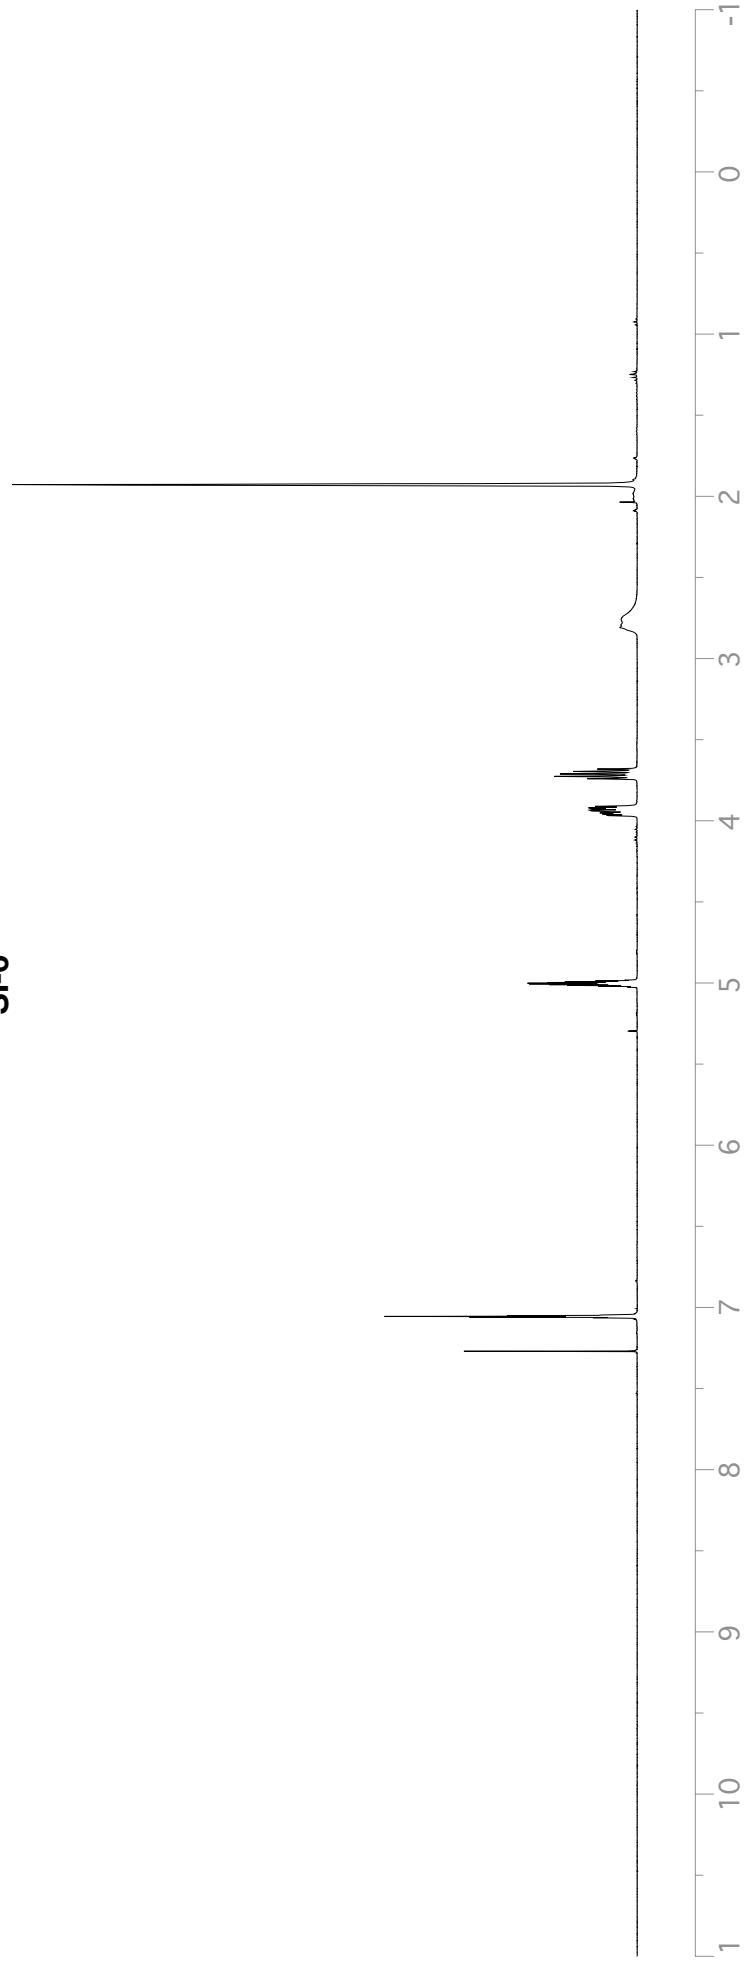

SI-24

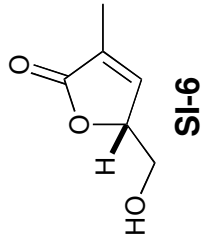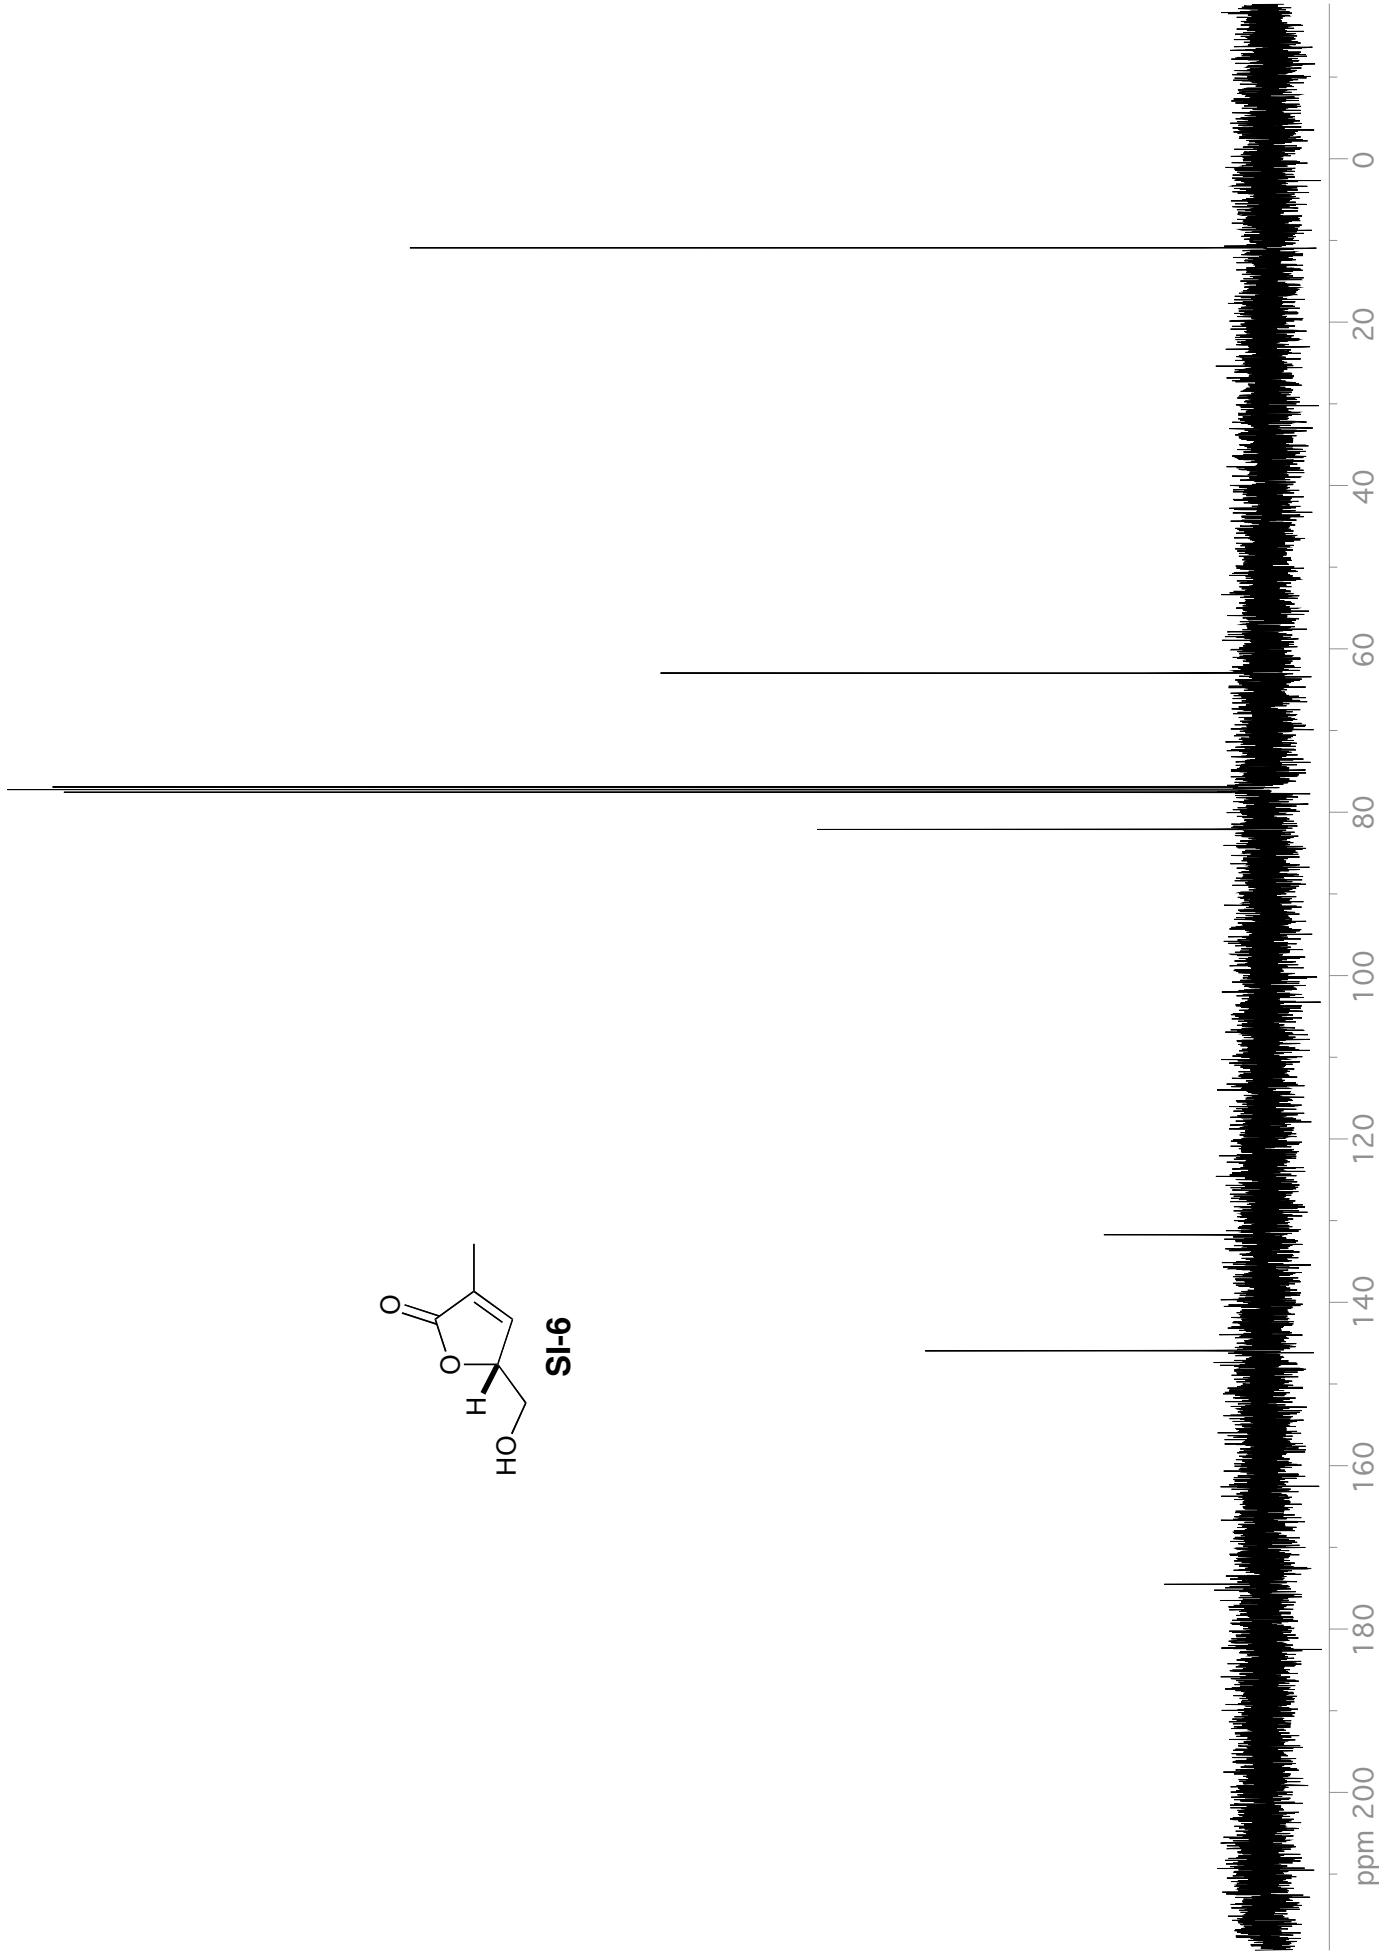



SI-25

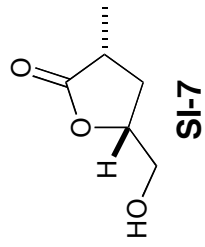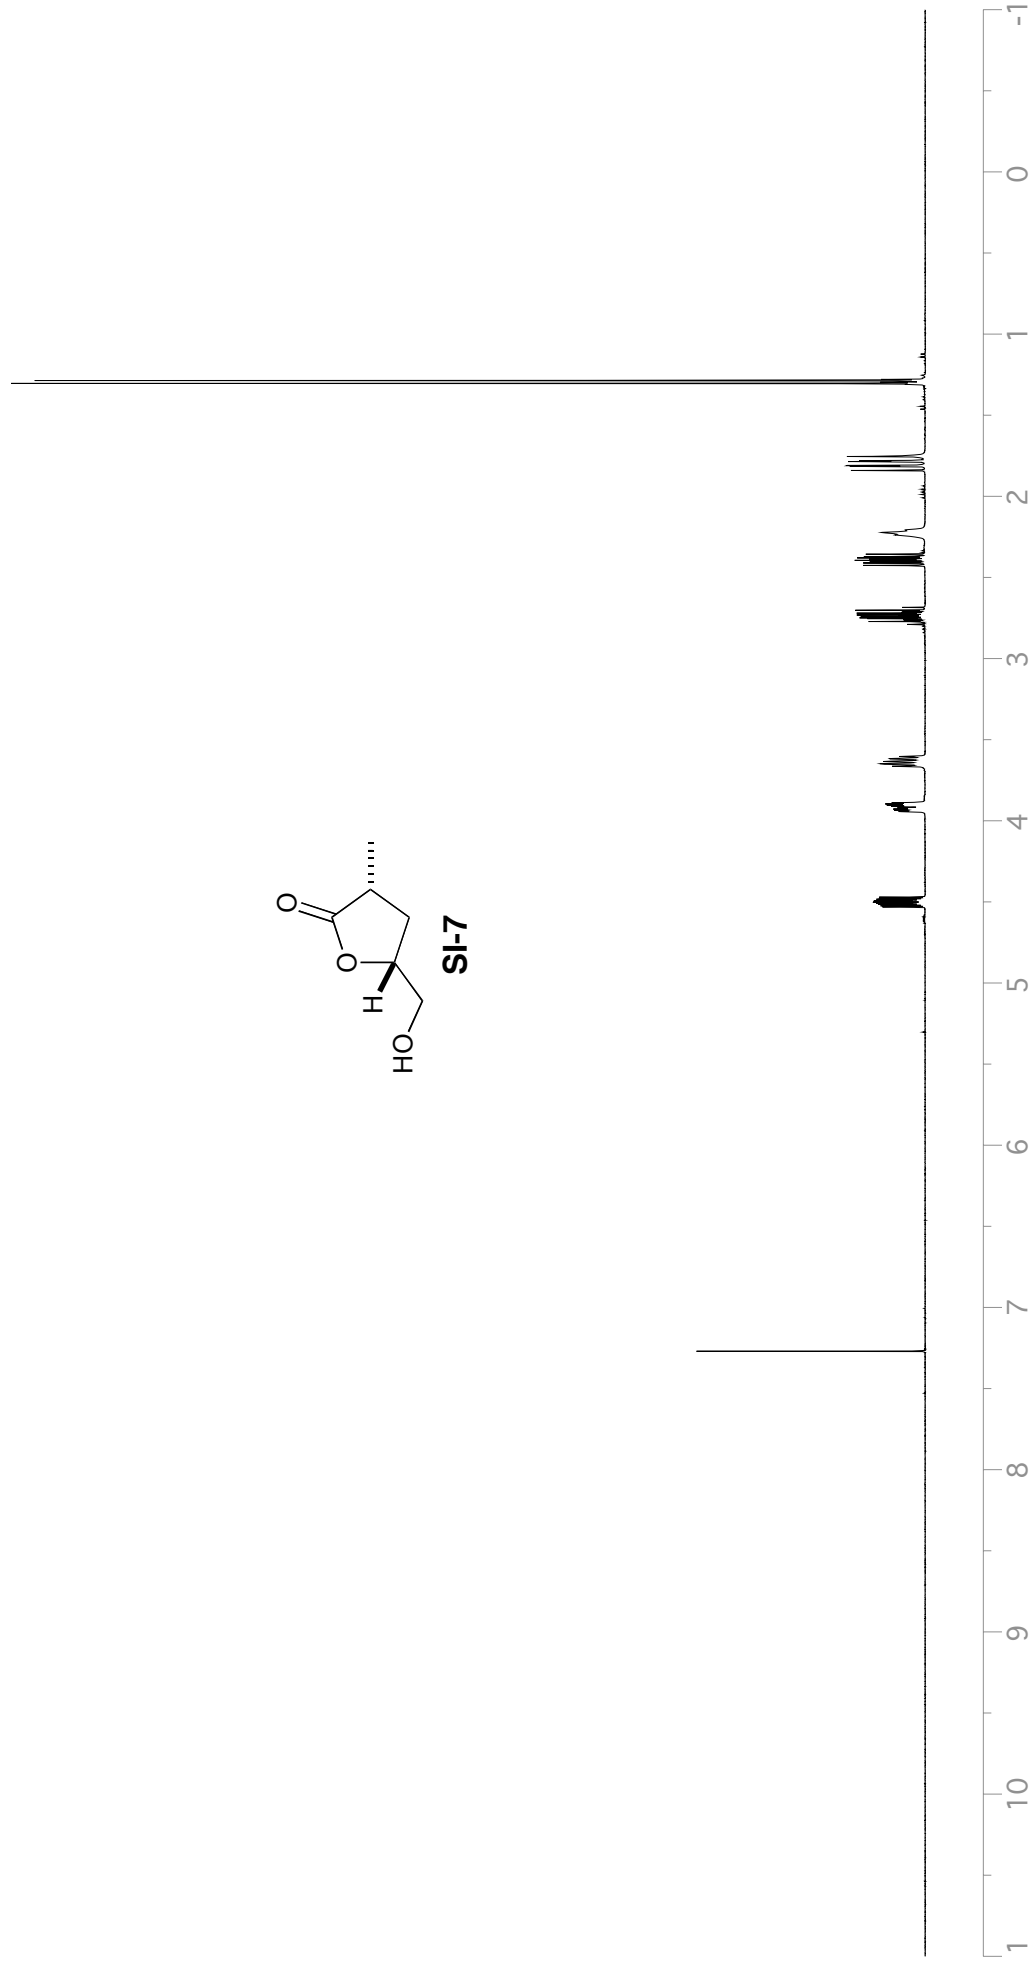

SI-26

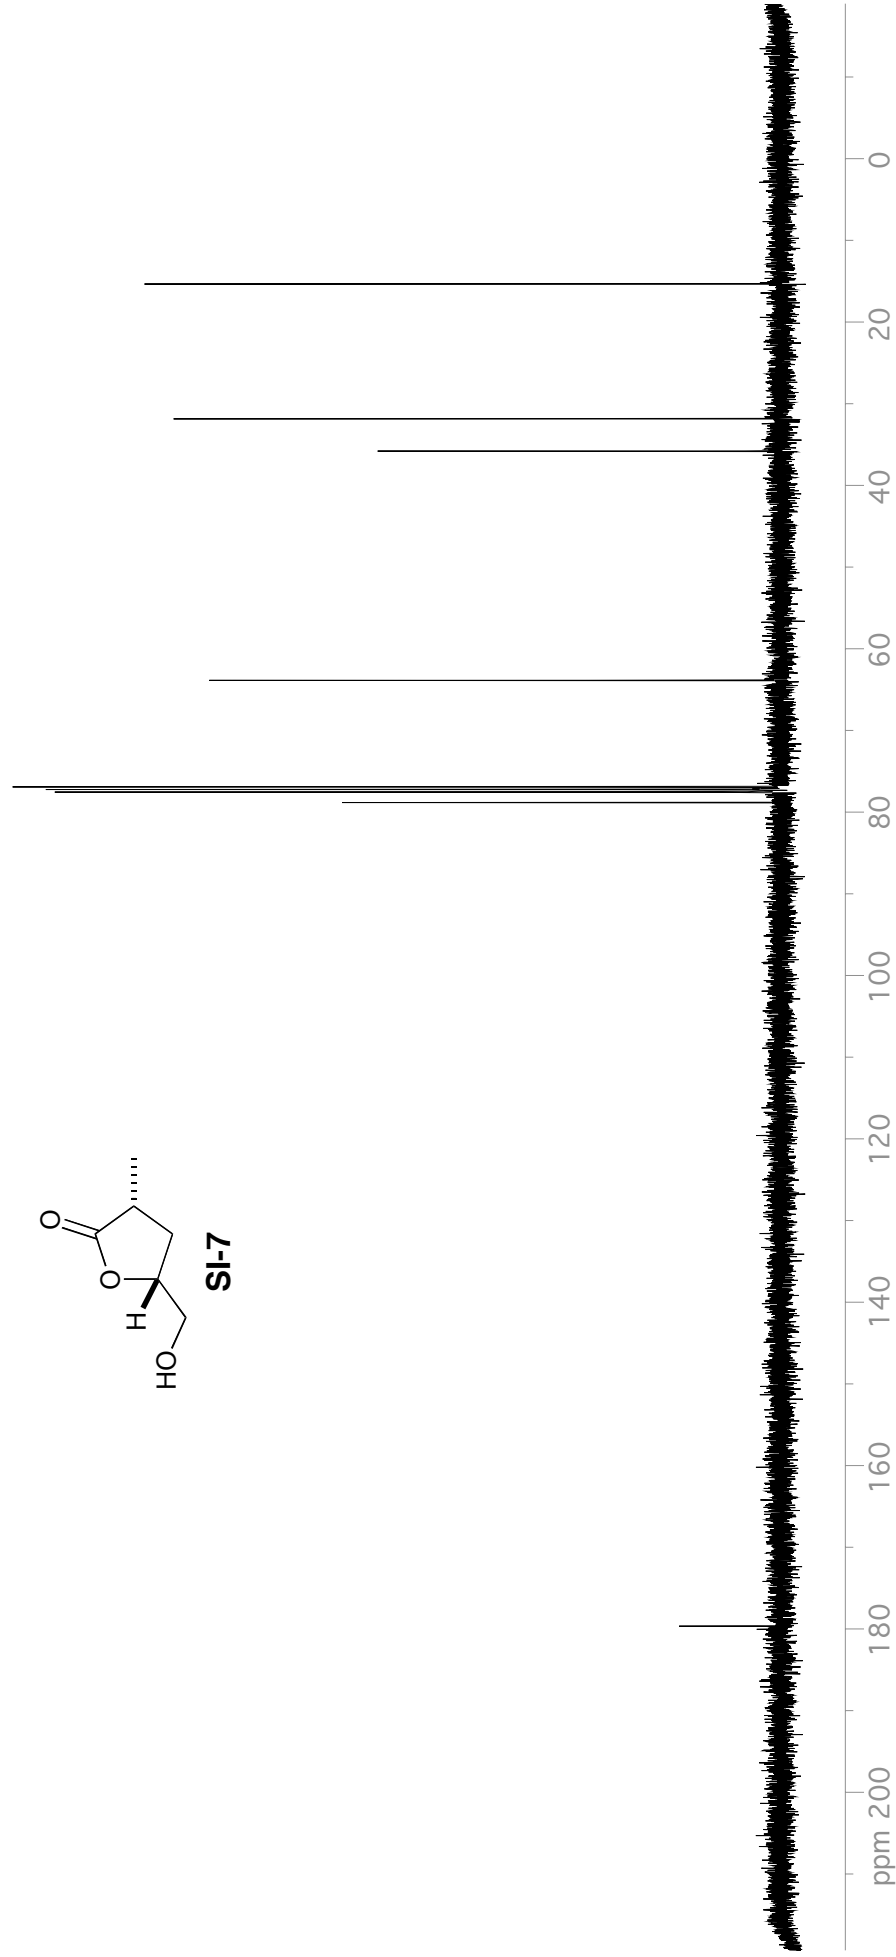

SI-27

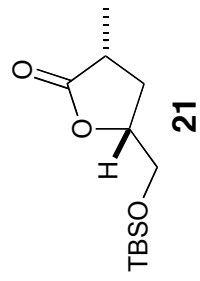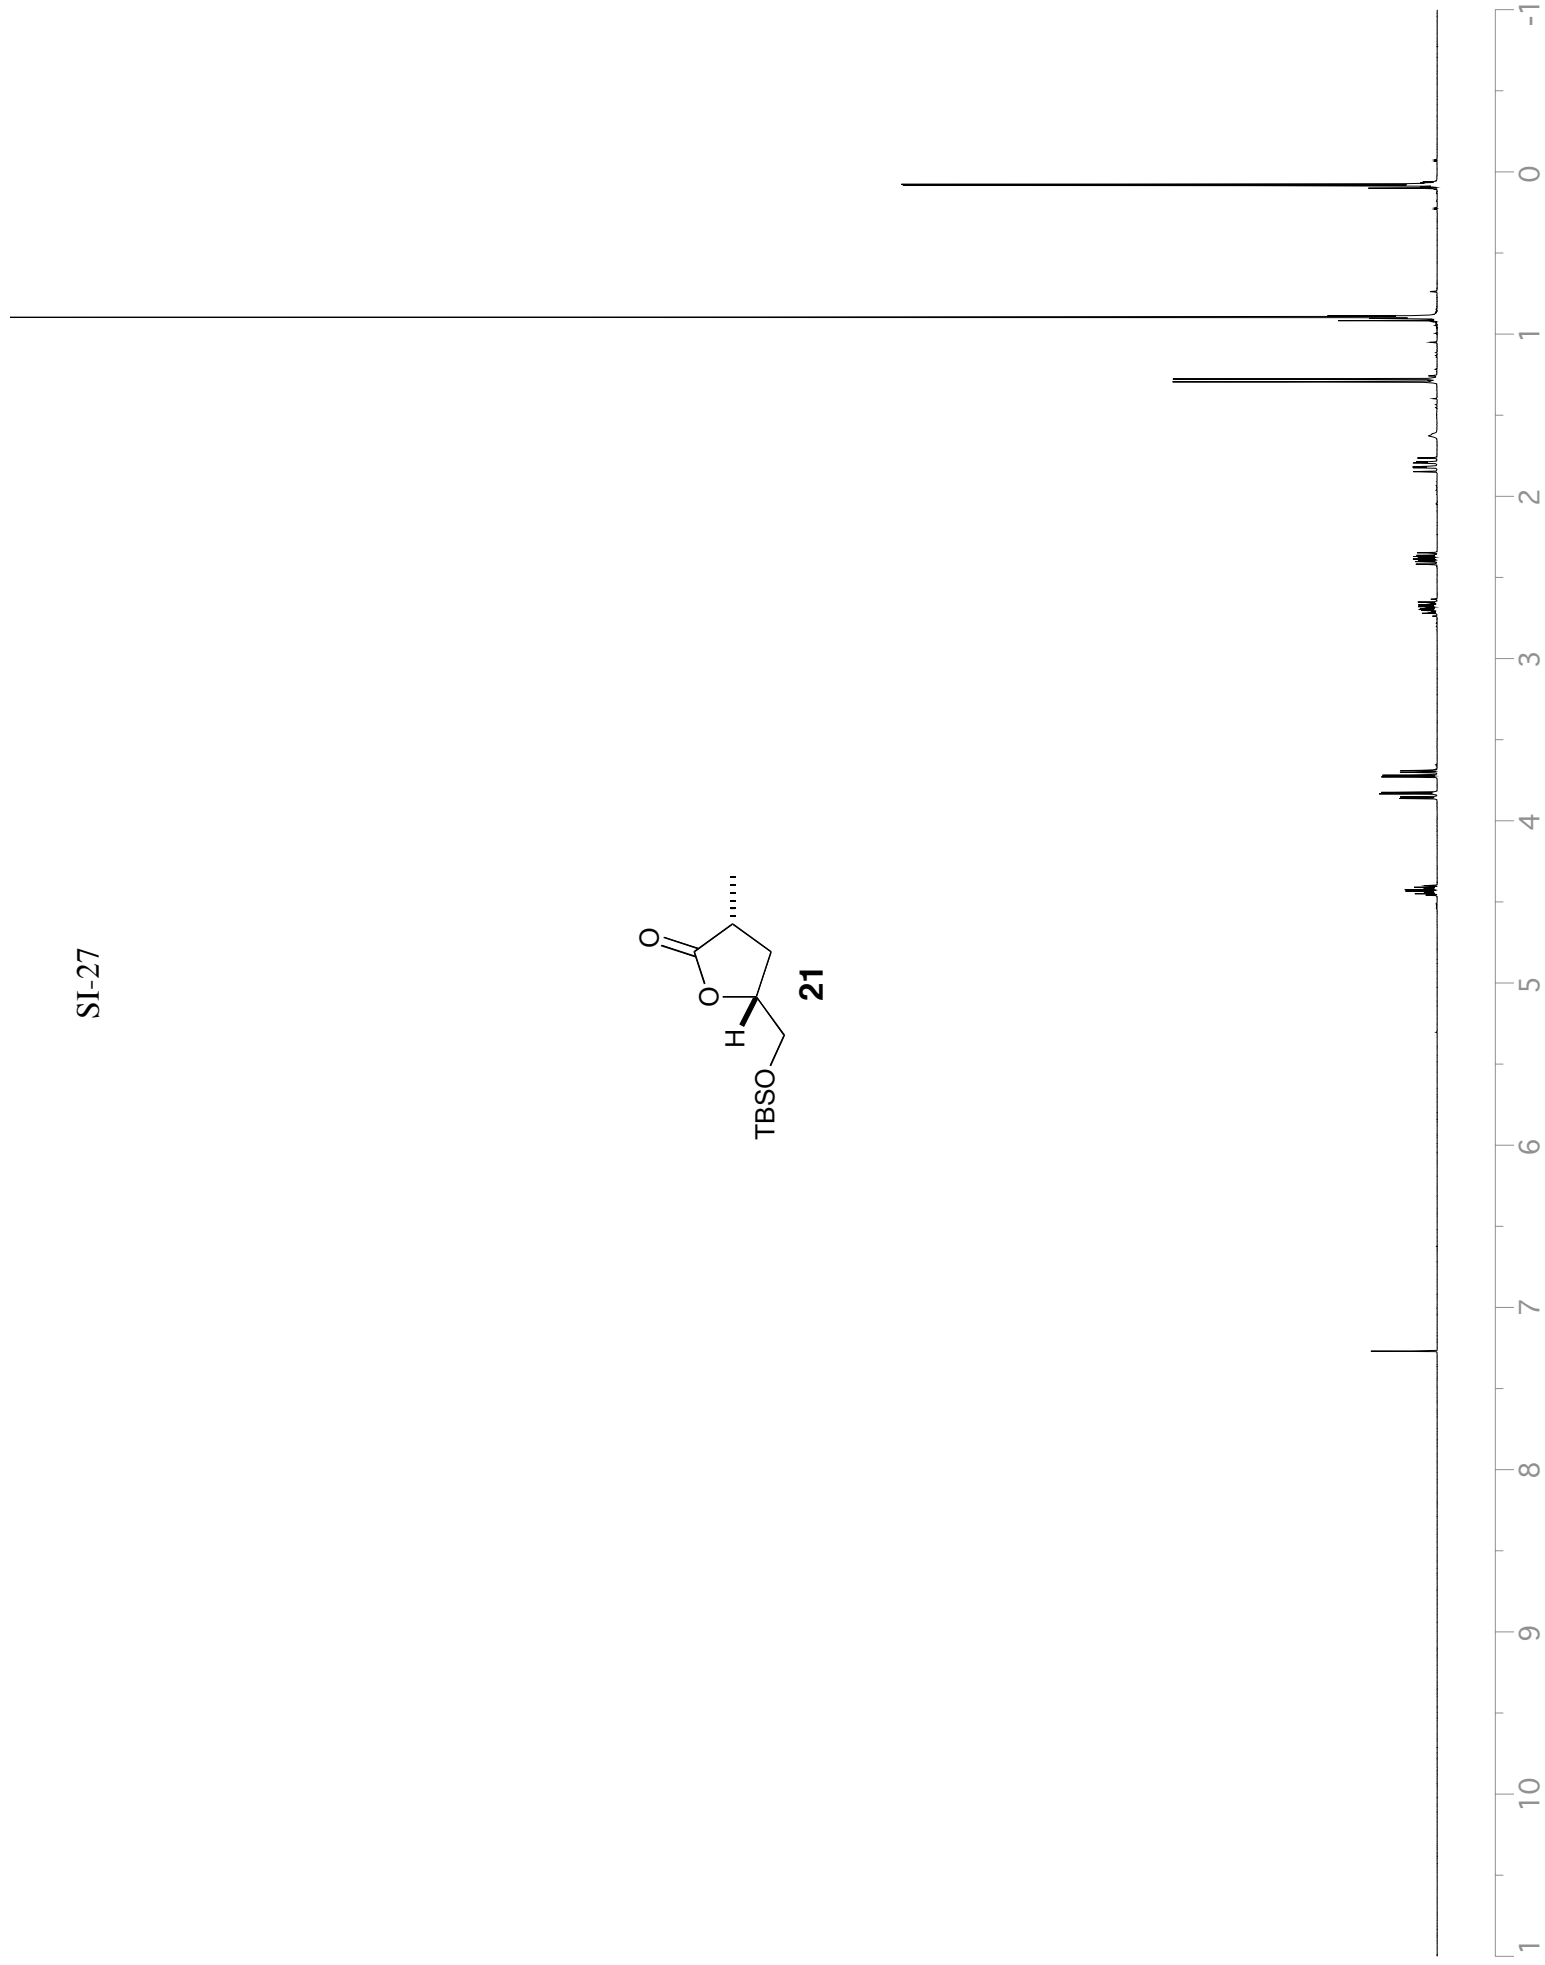

SI-28

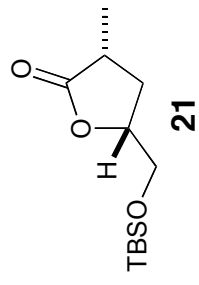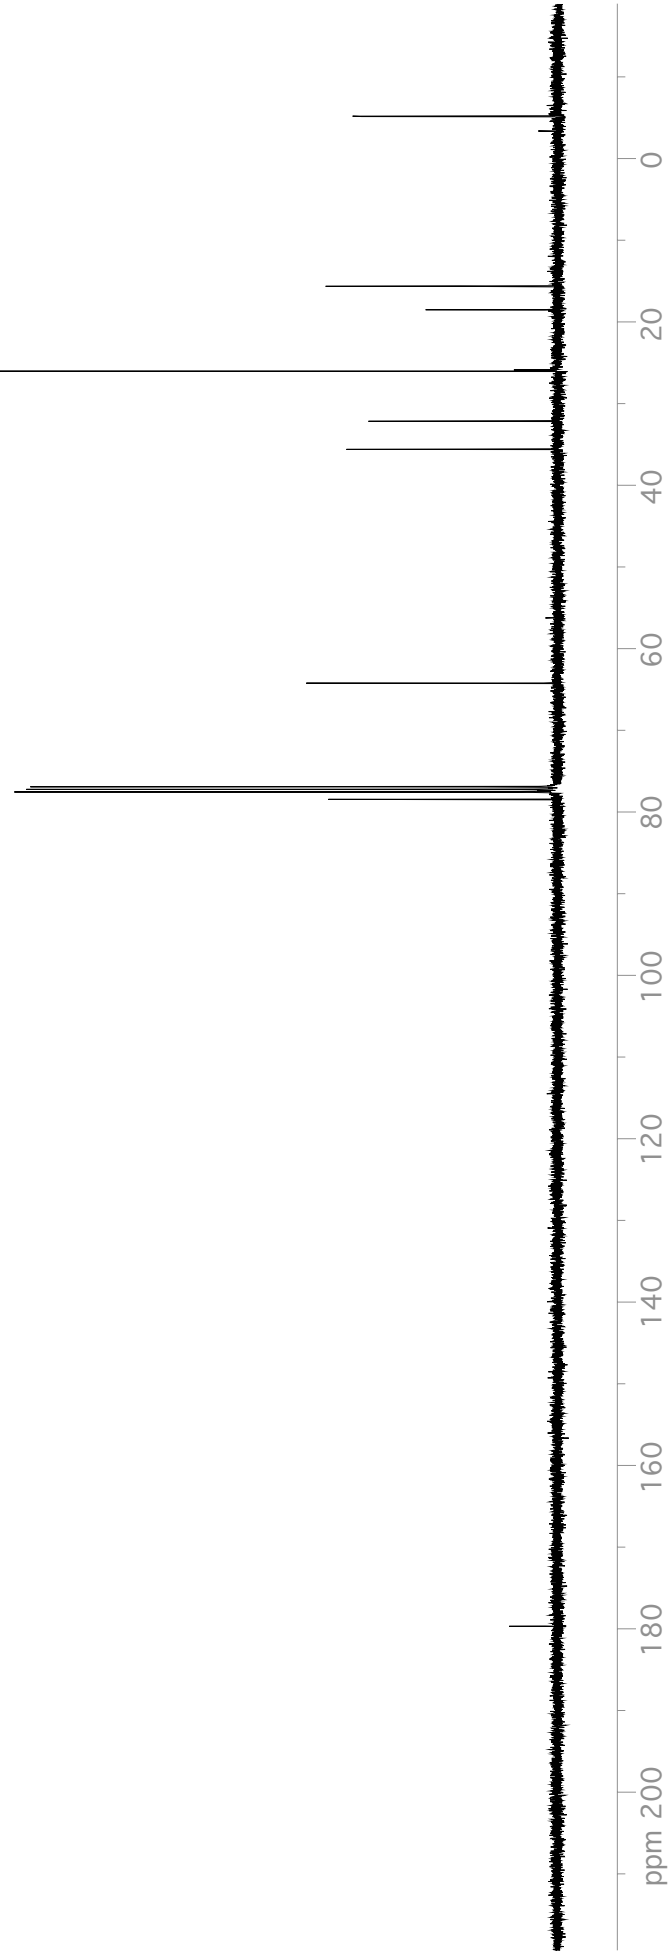

SI-29

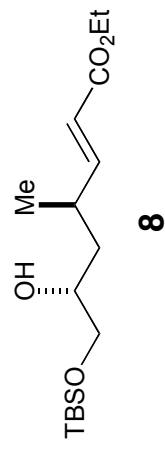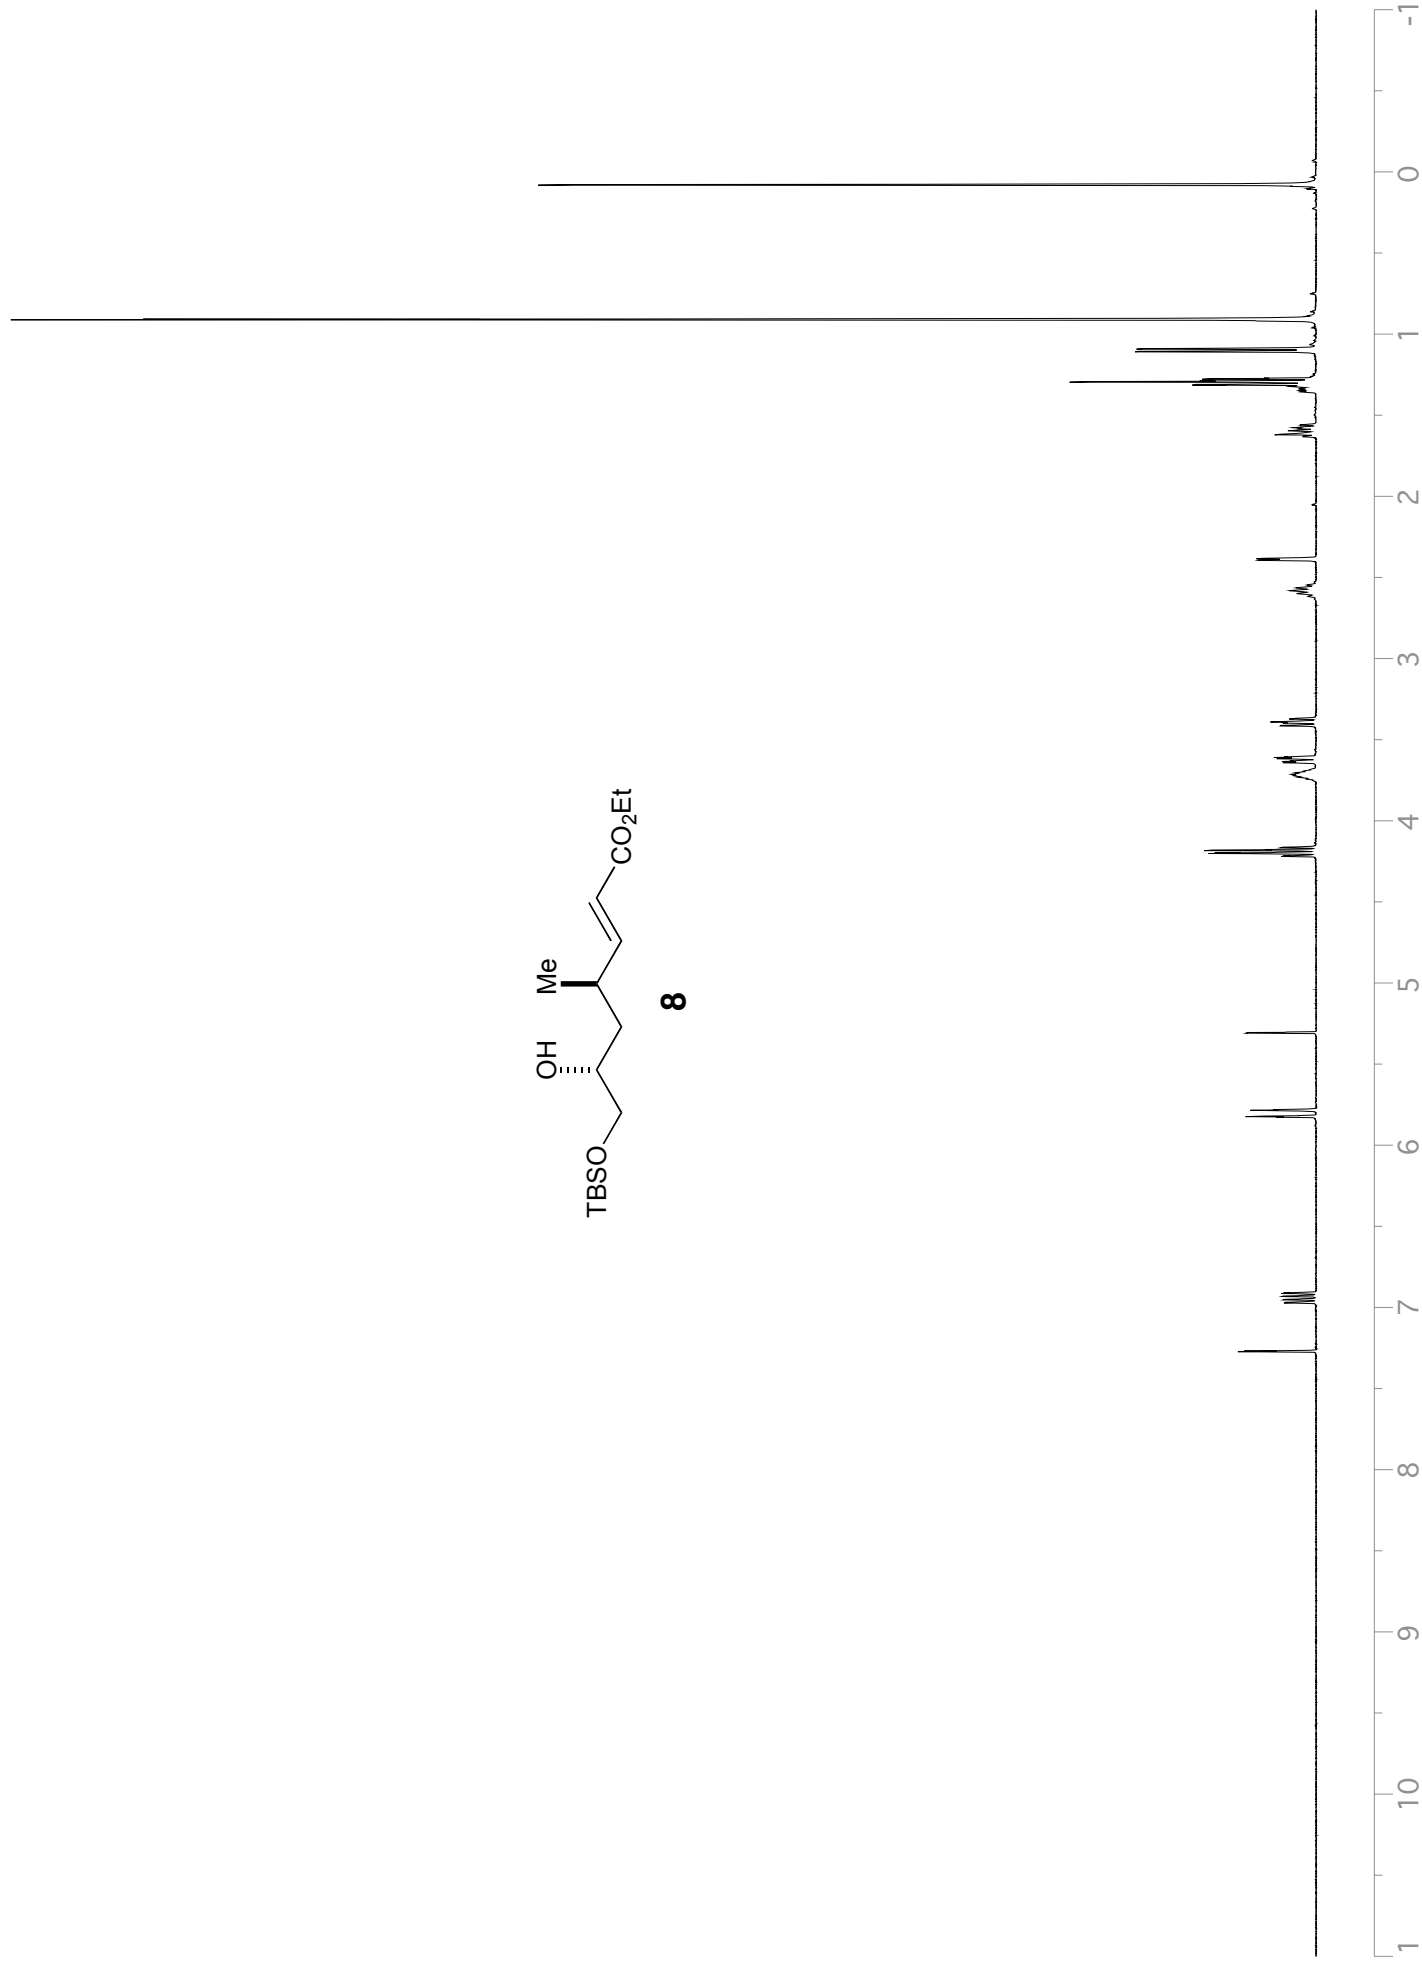

SI-30

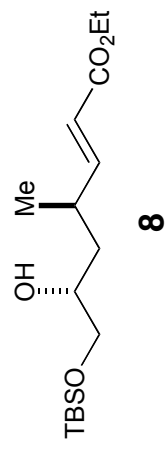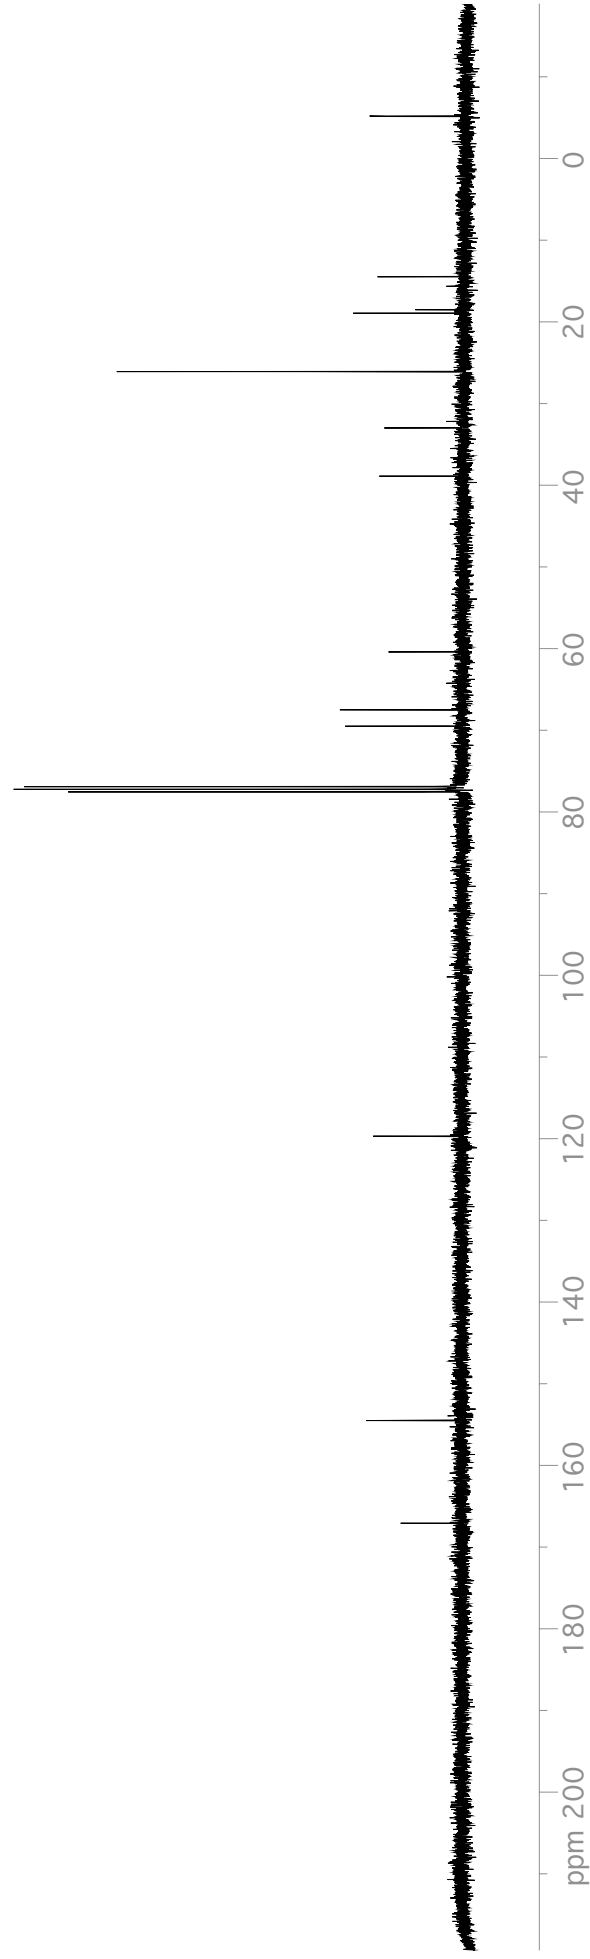

SI-31

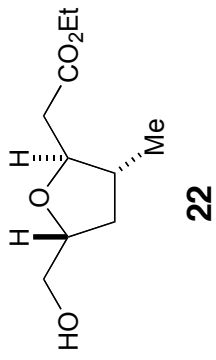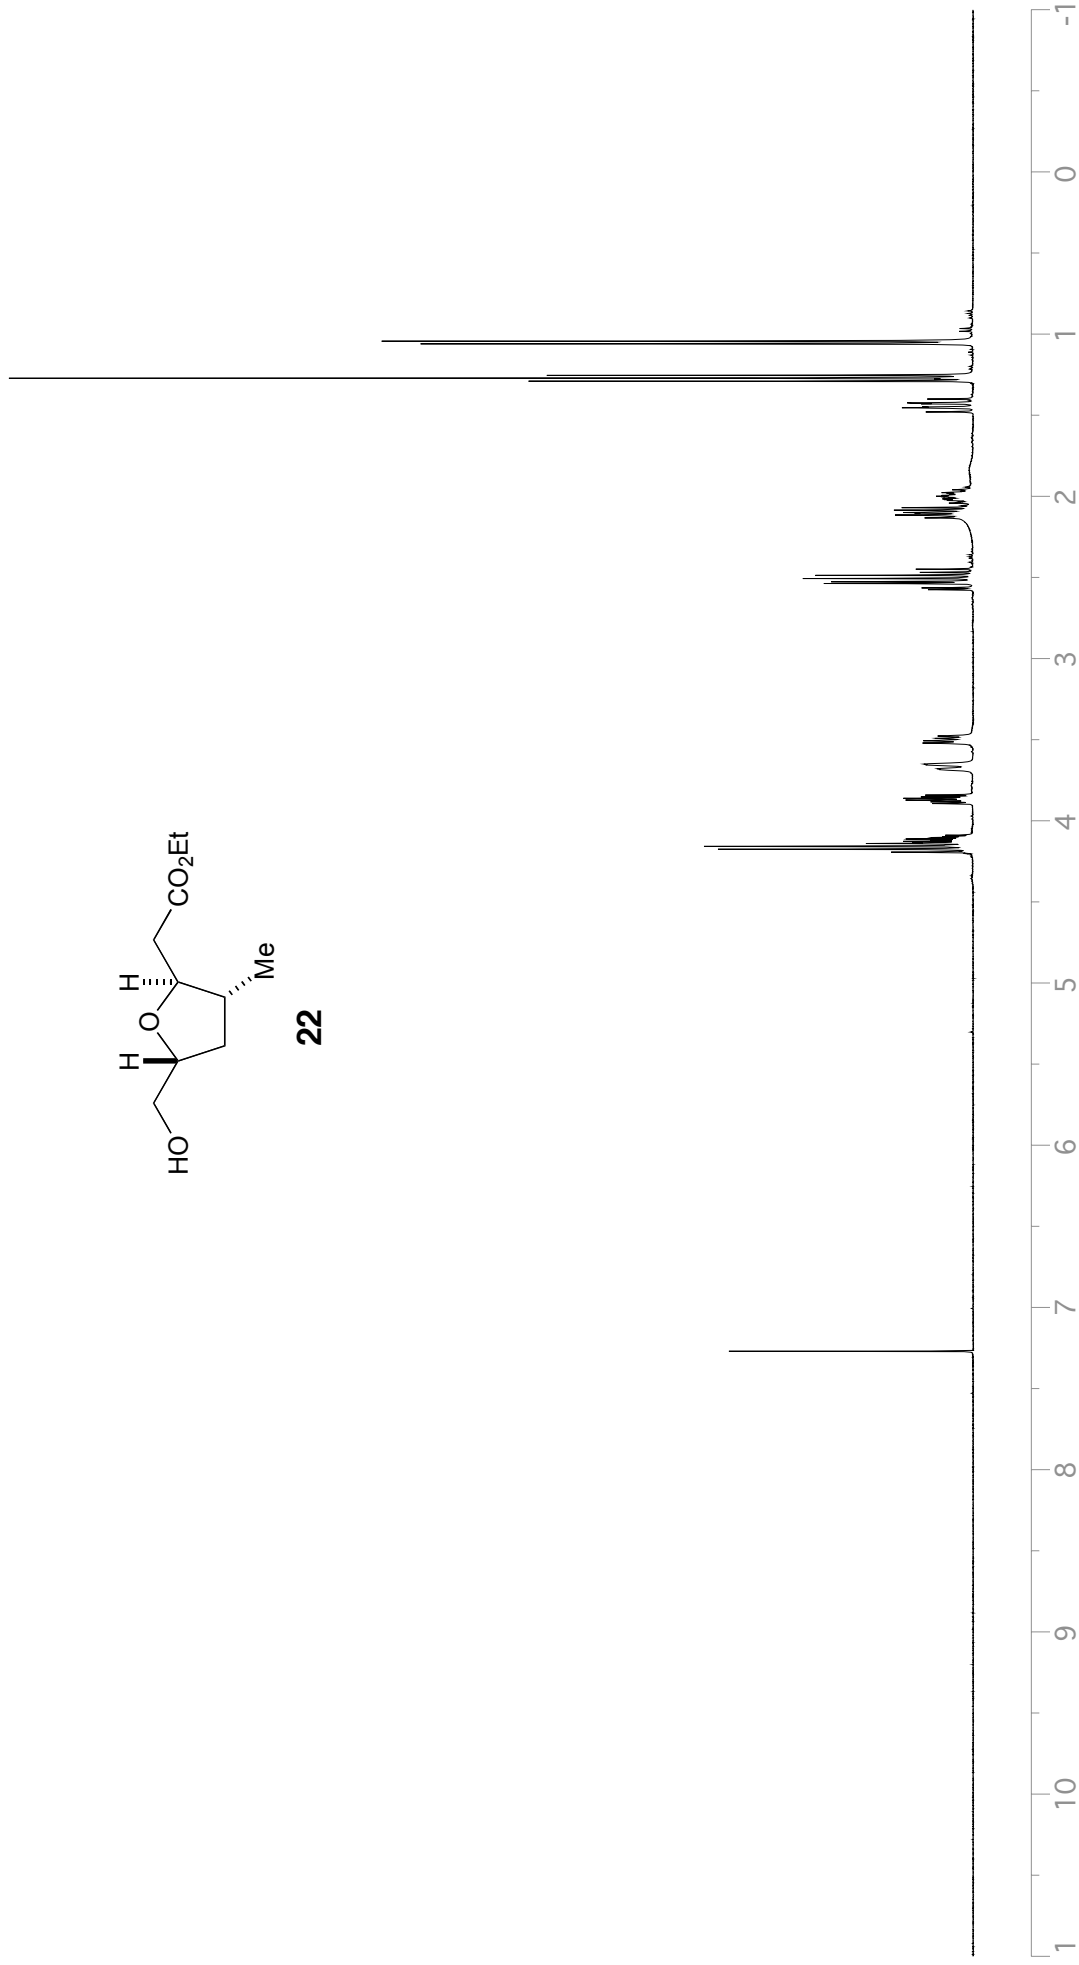

SI-32

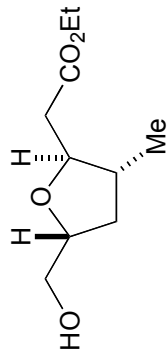

22

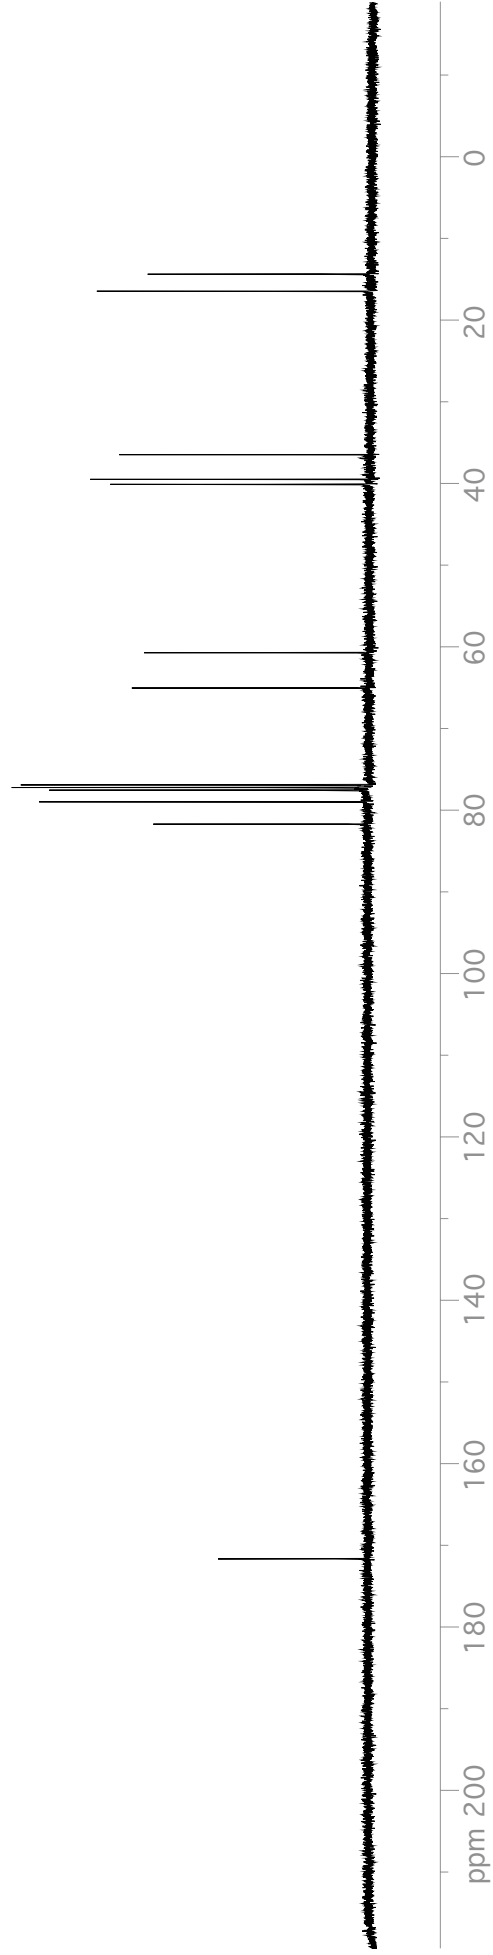



SI-33

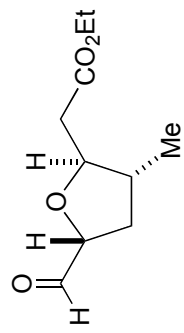

24

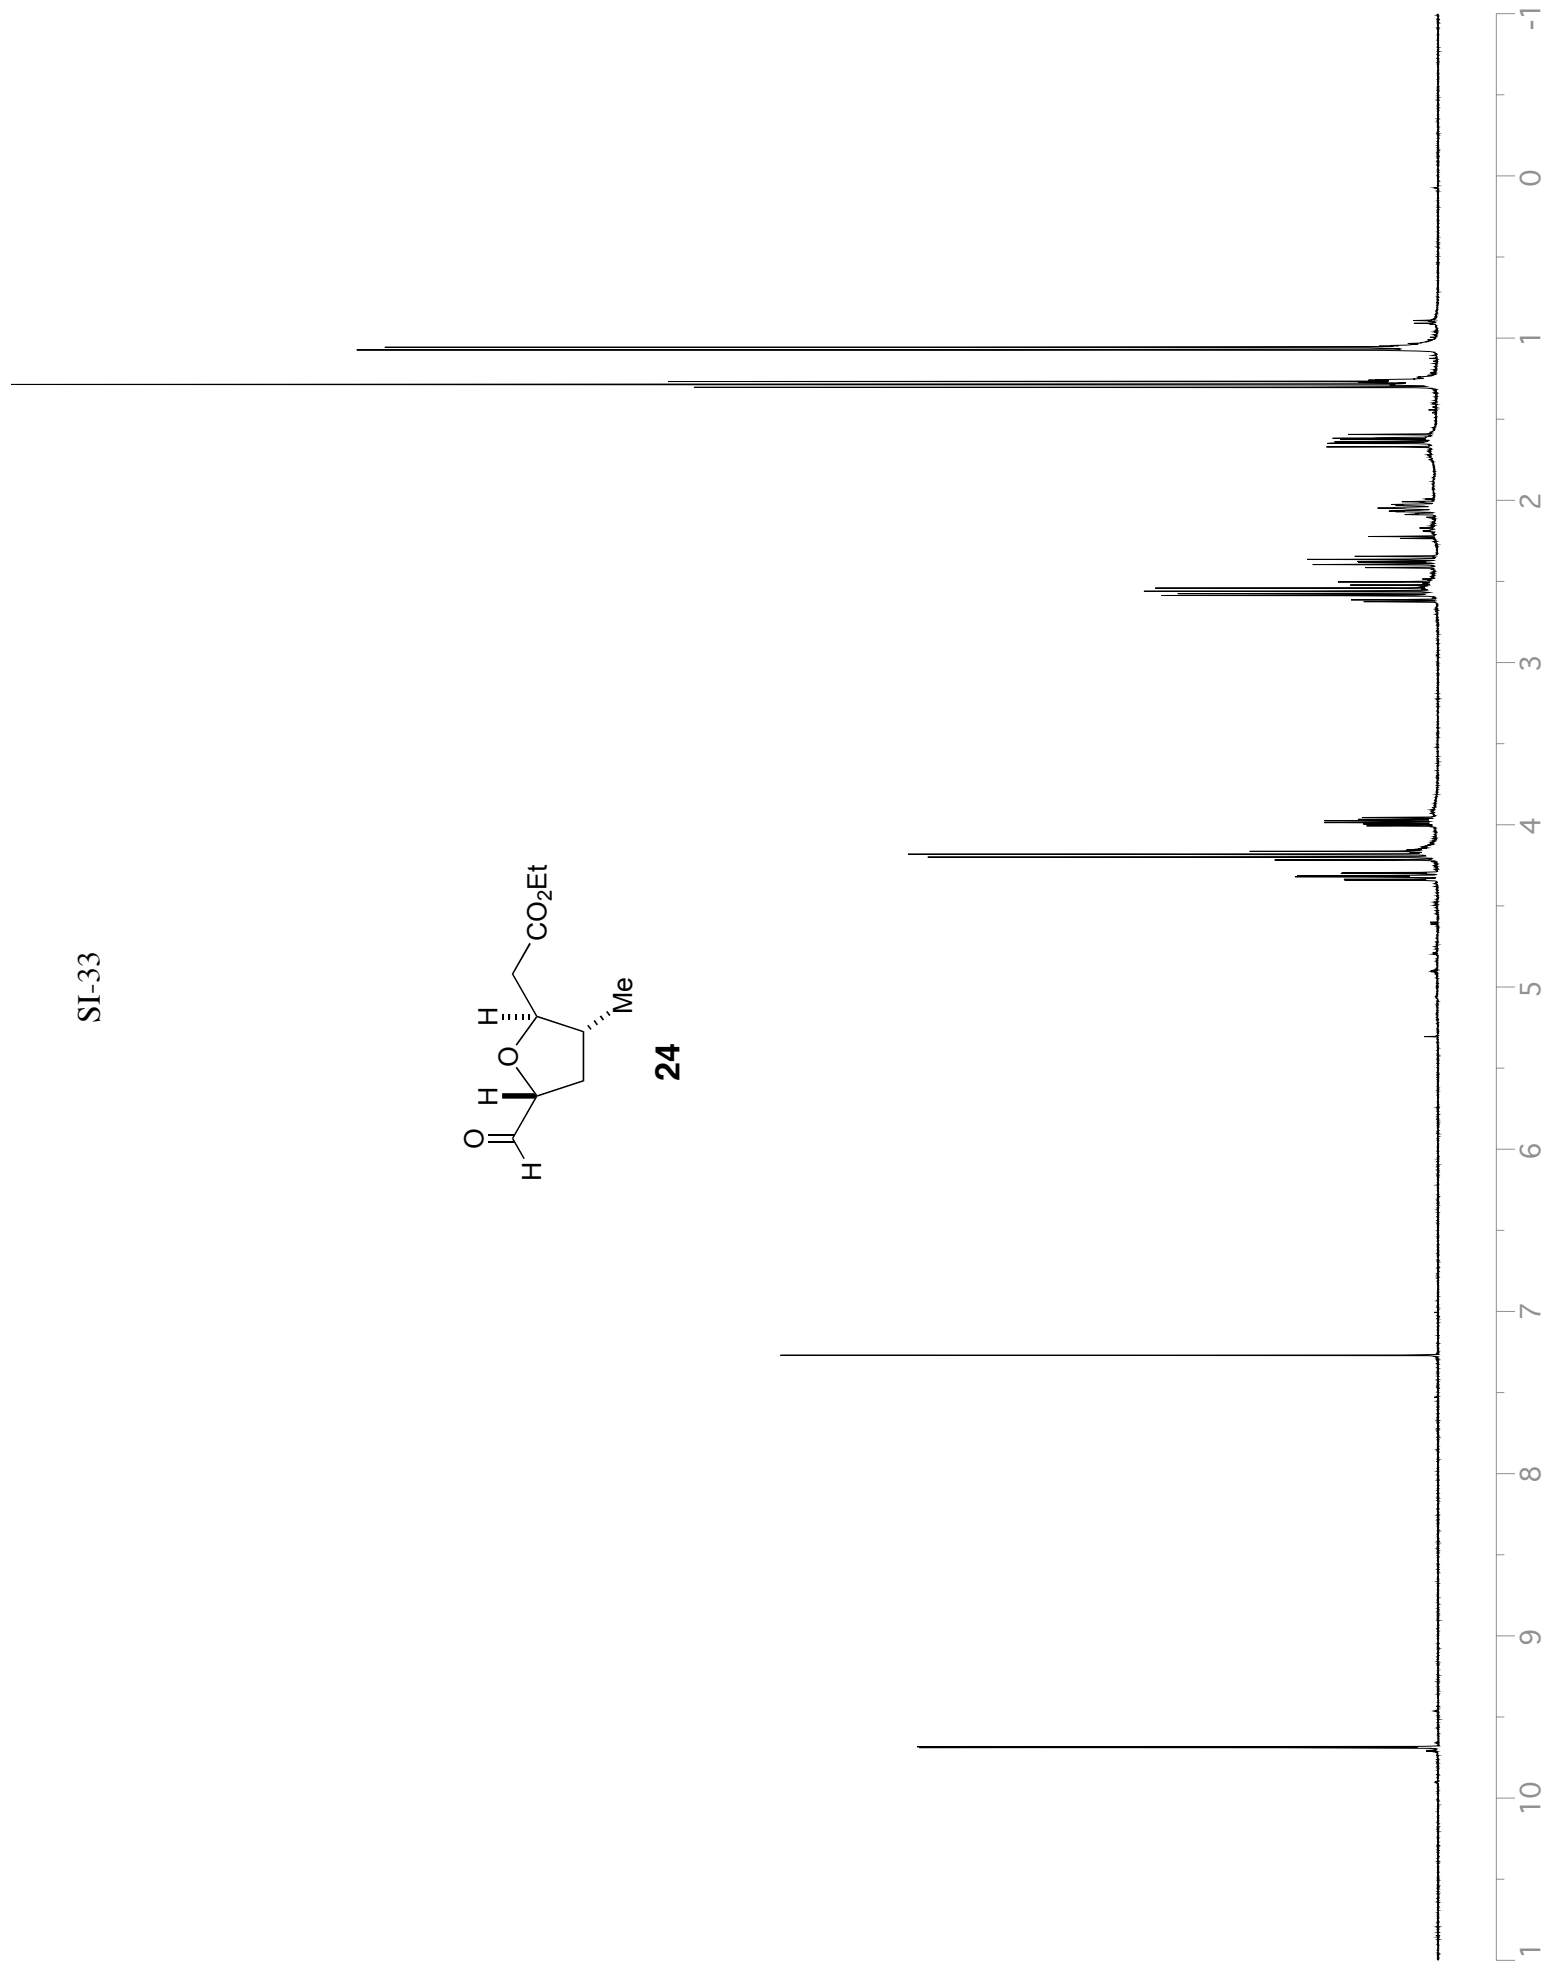

SI-34

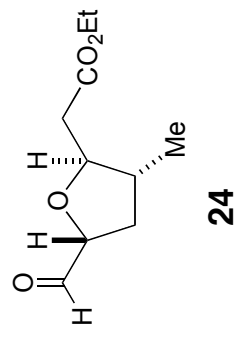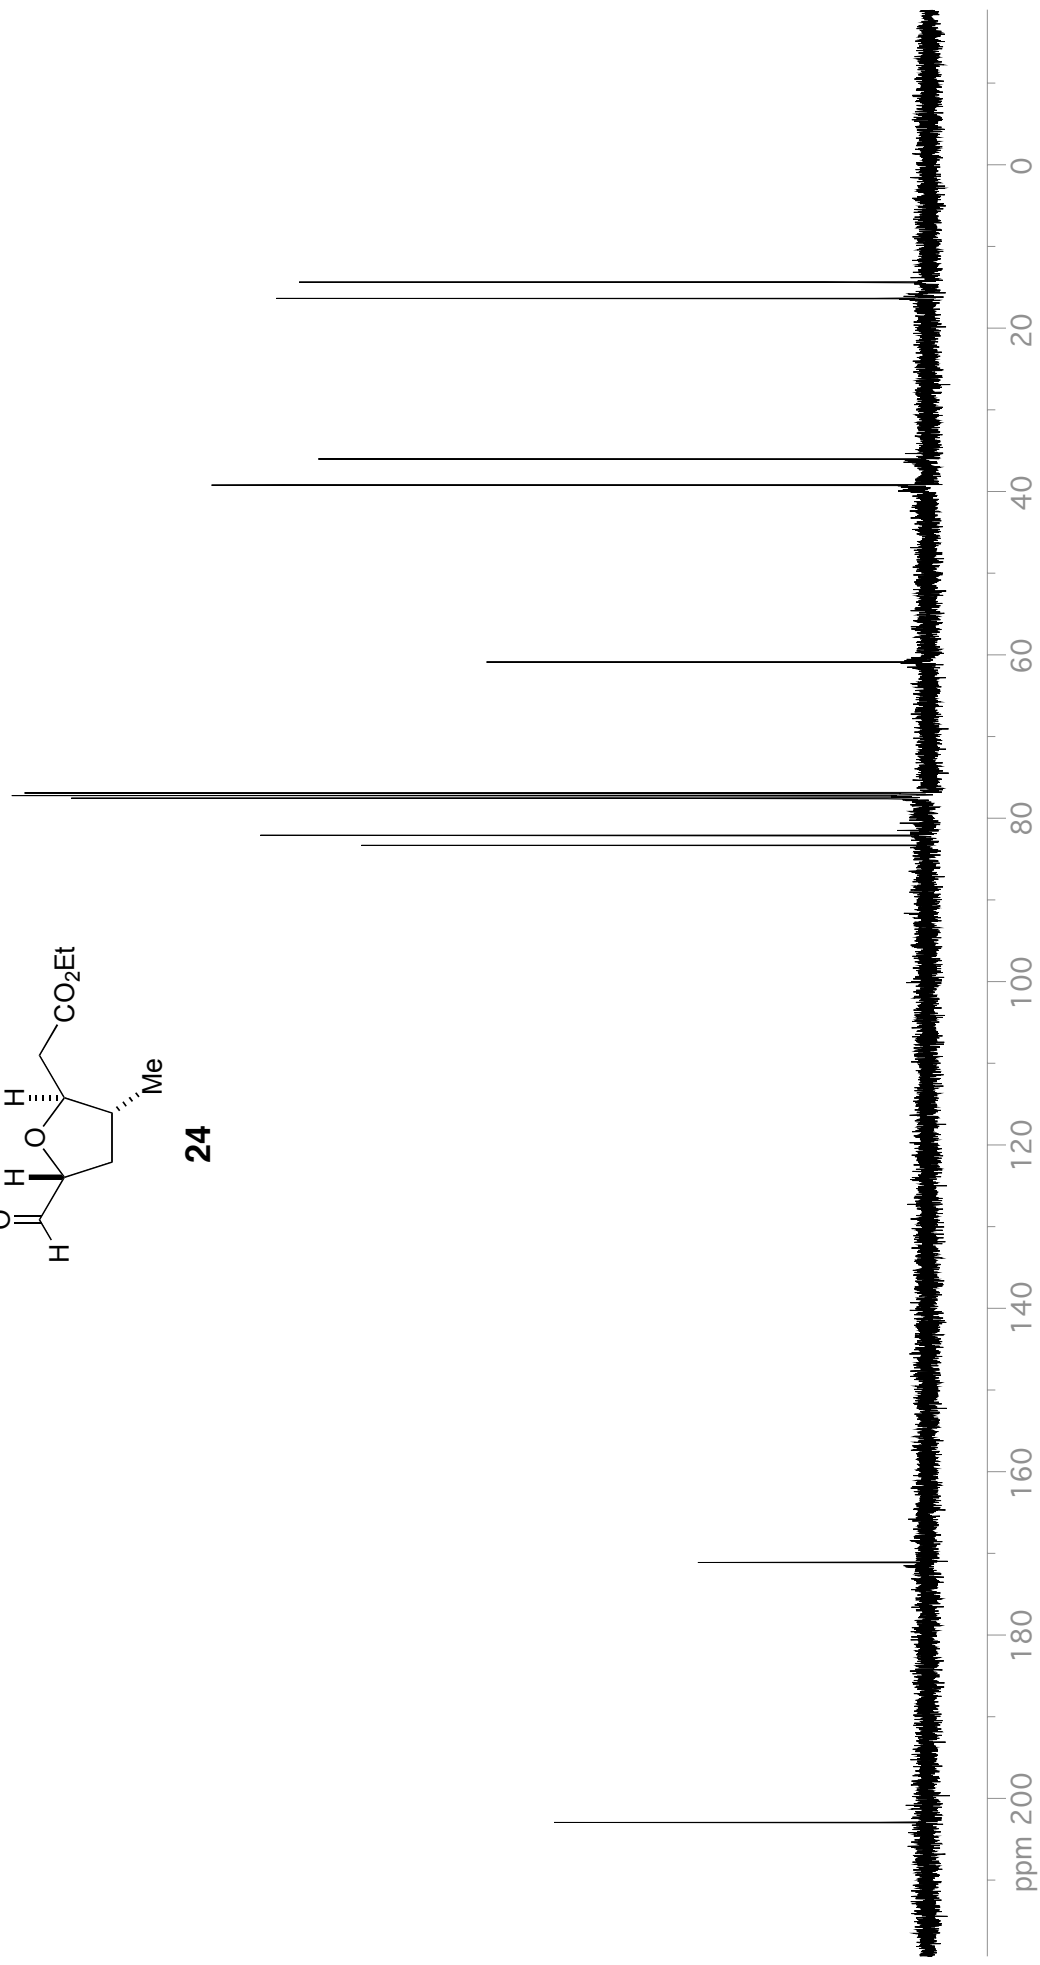

SI-35

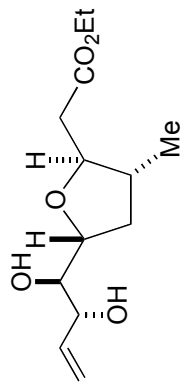

26

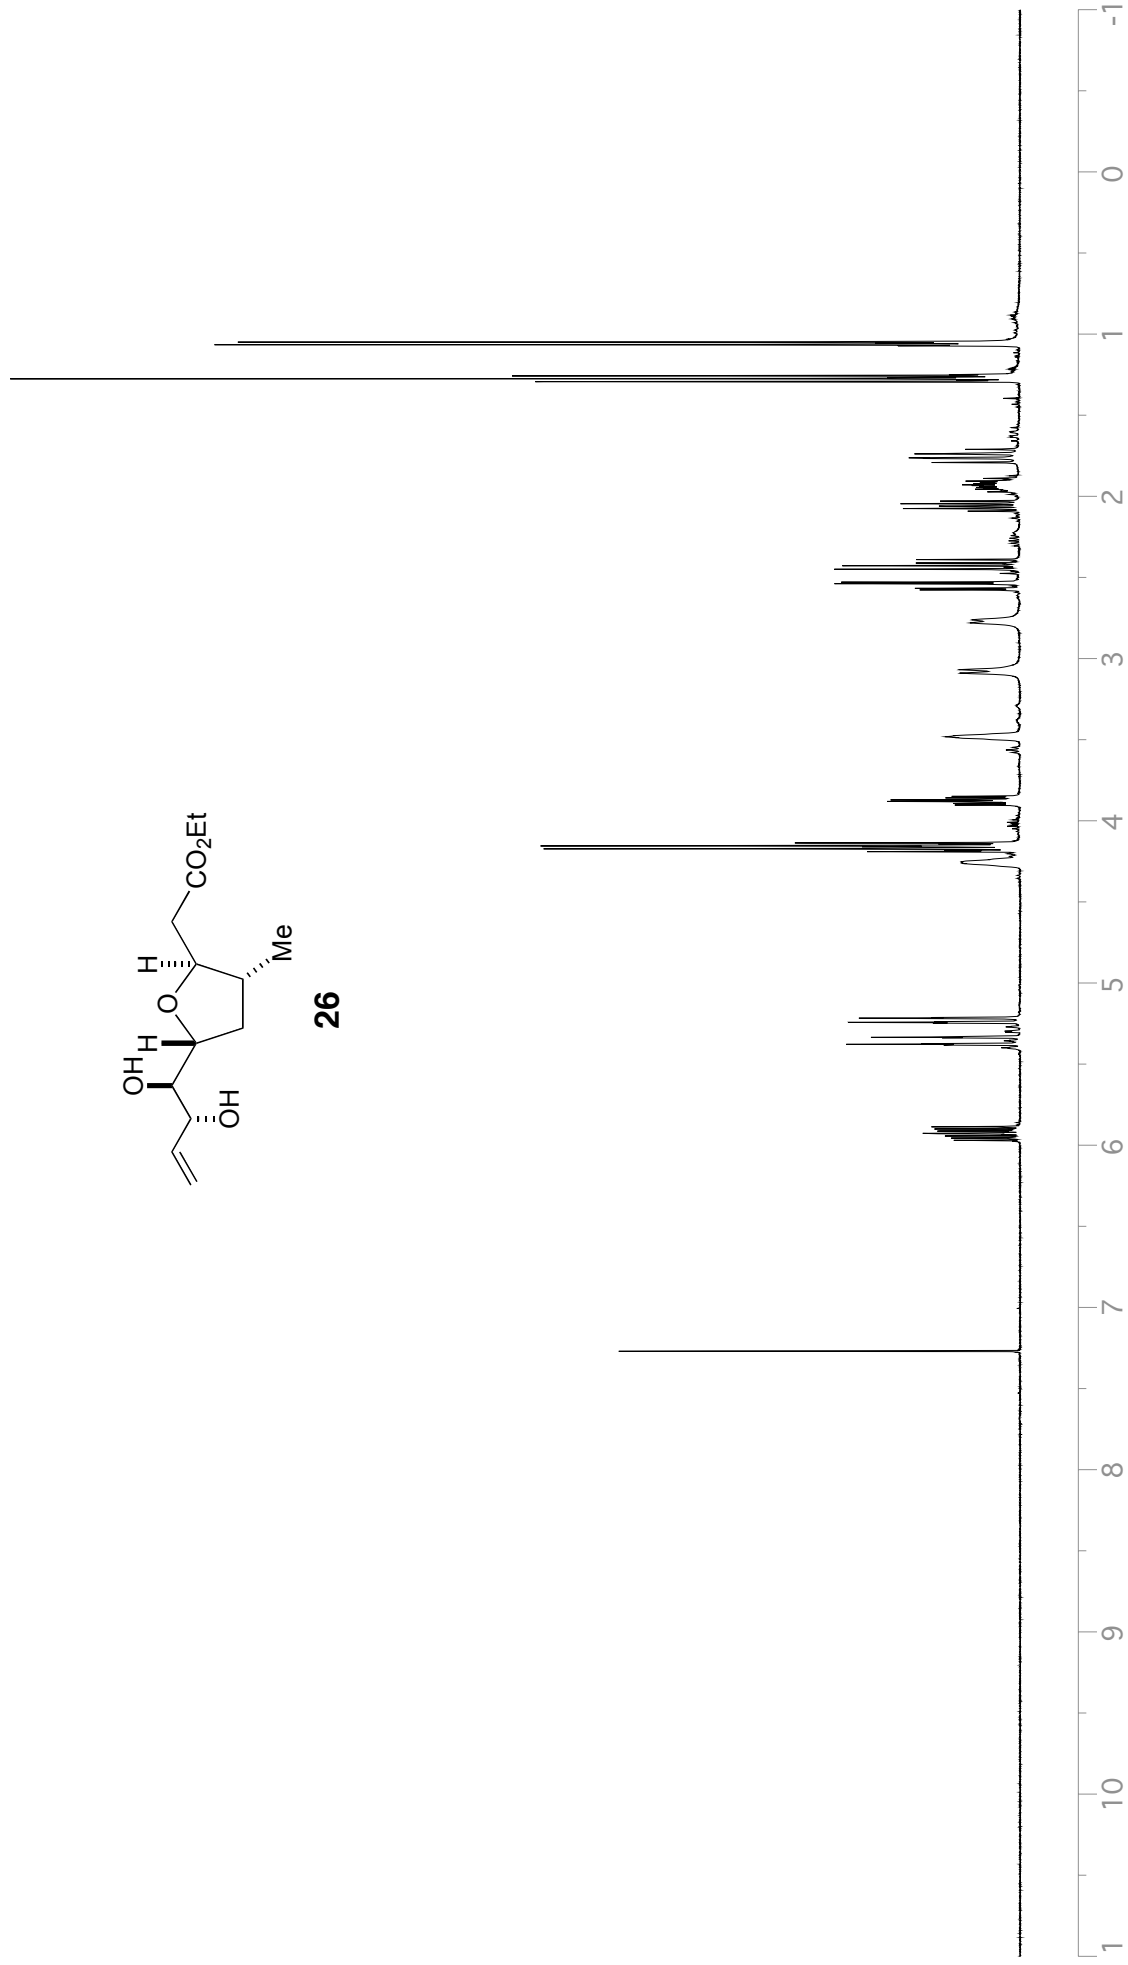

SI-36

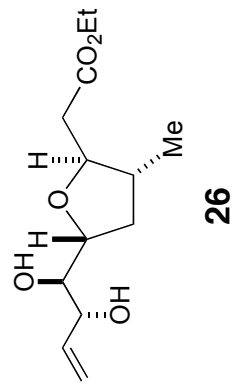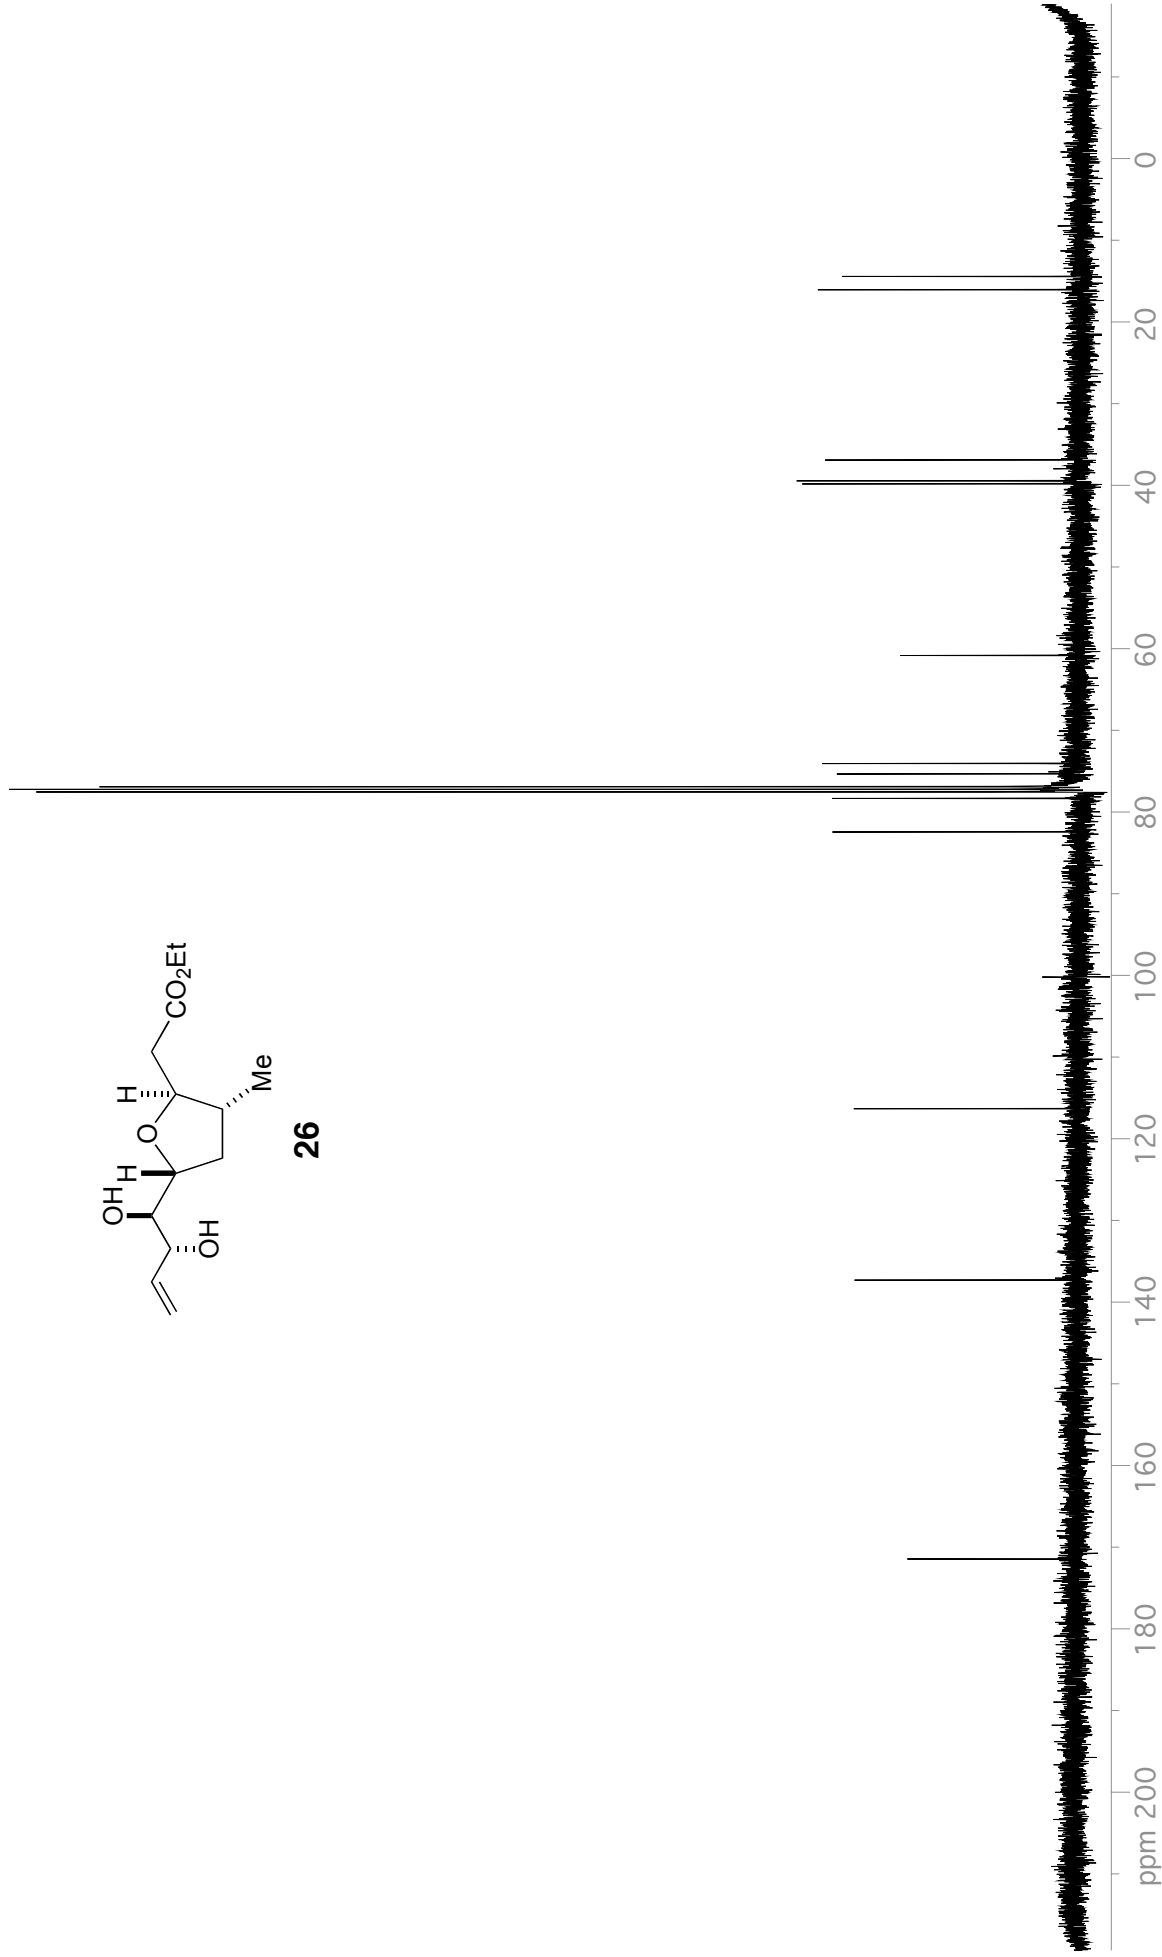

SI-37

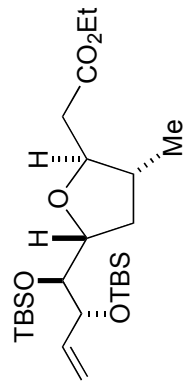

27

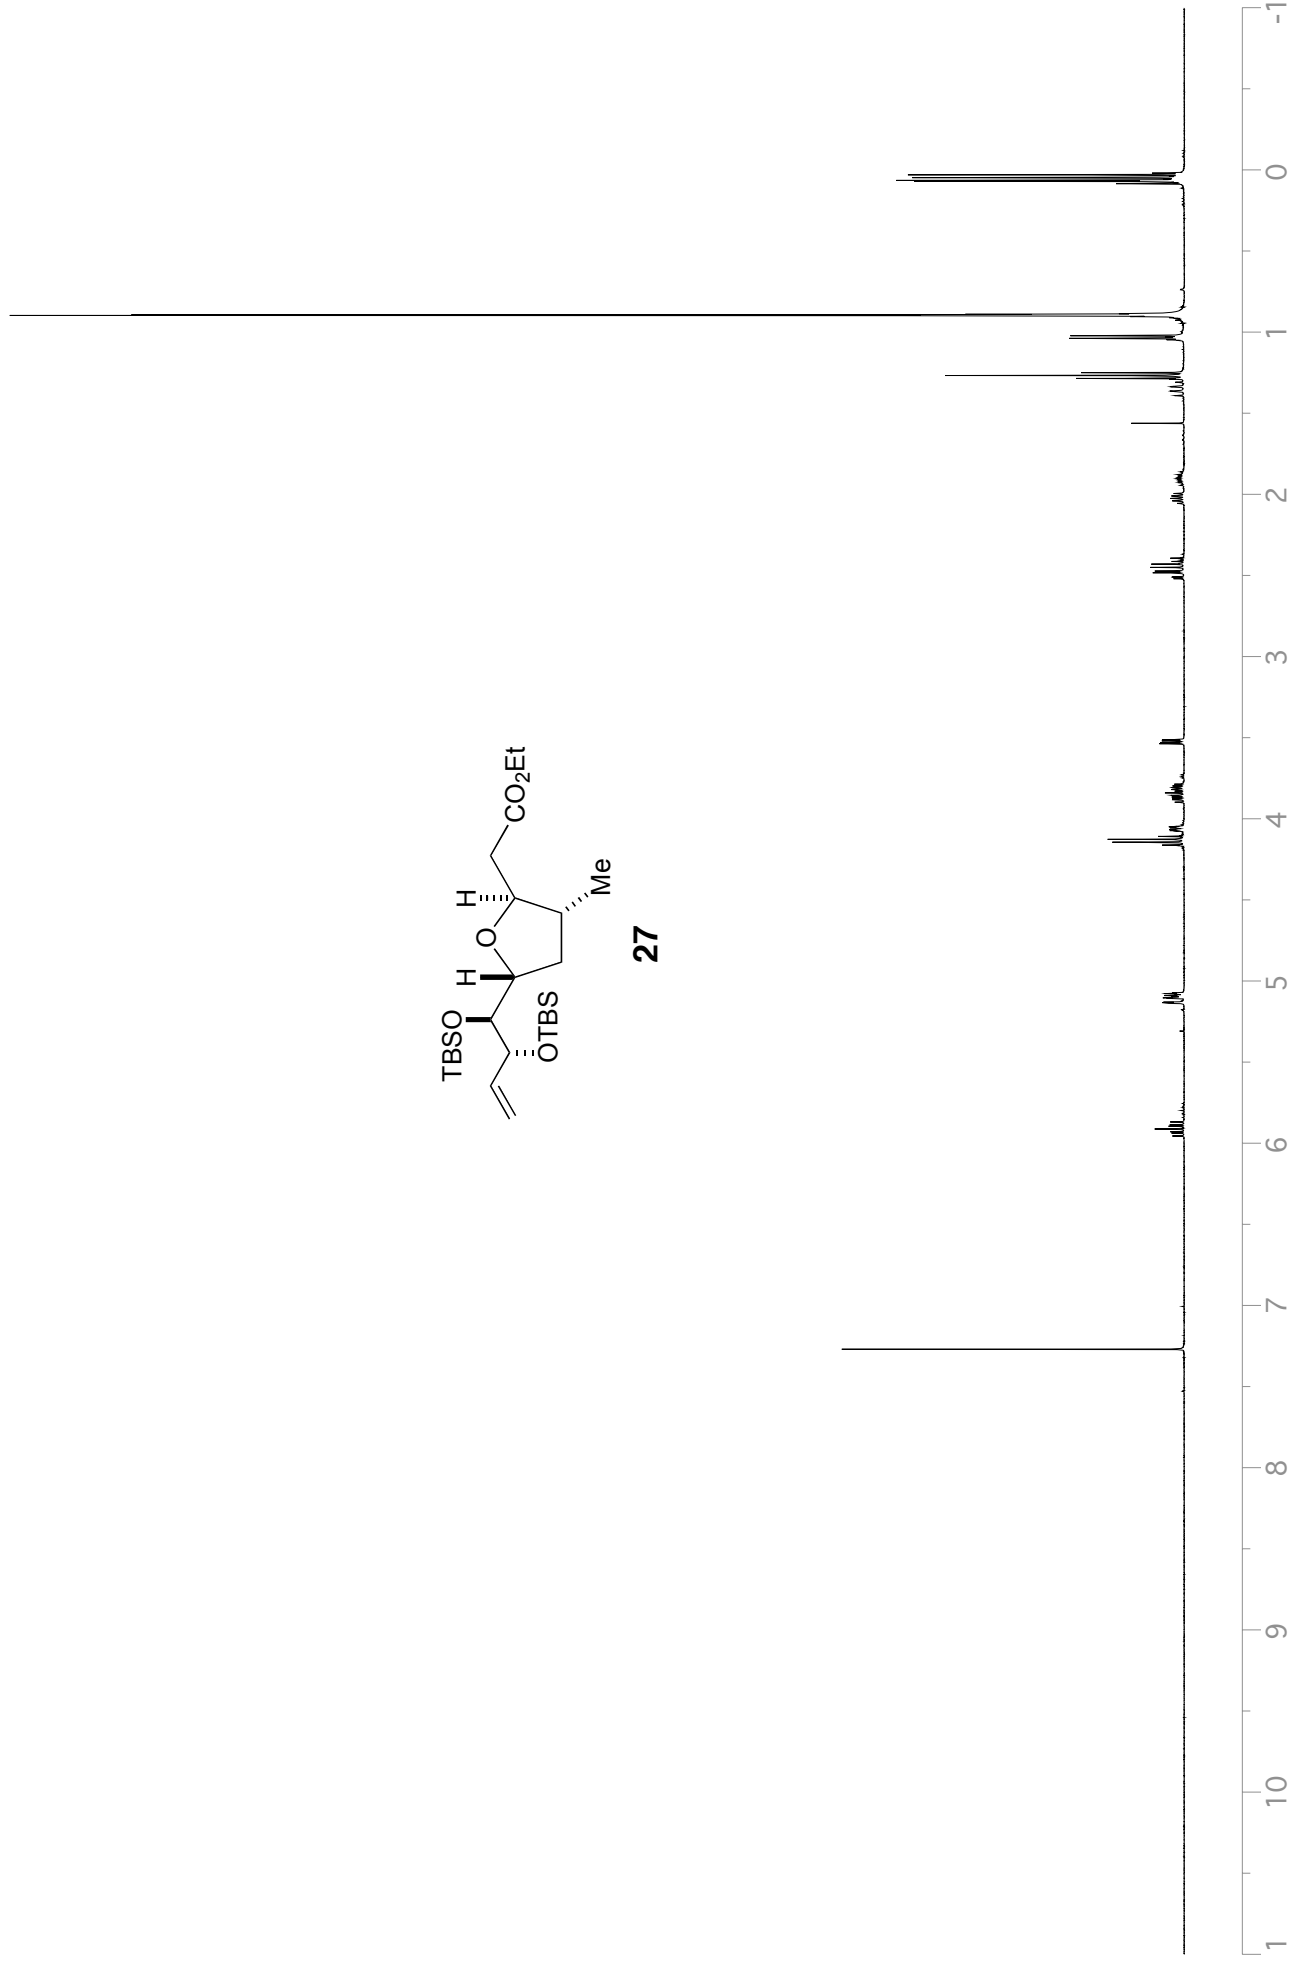

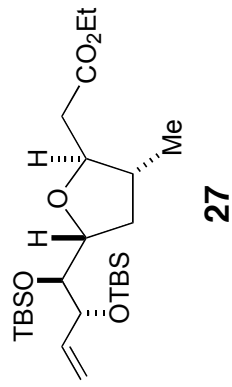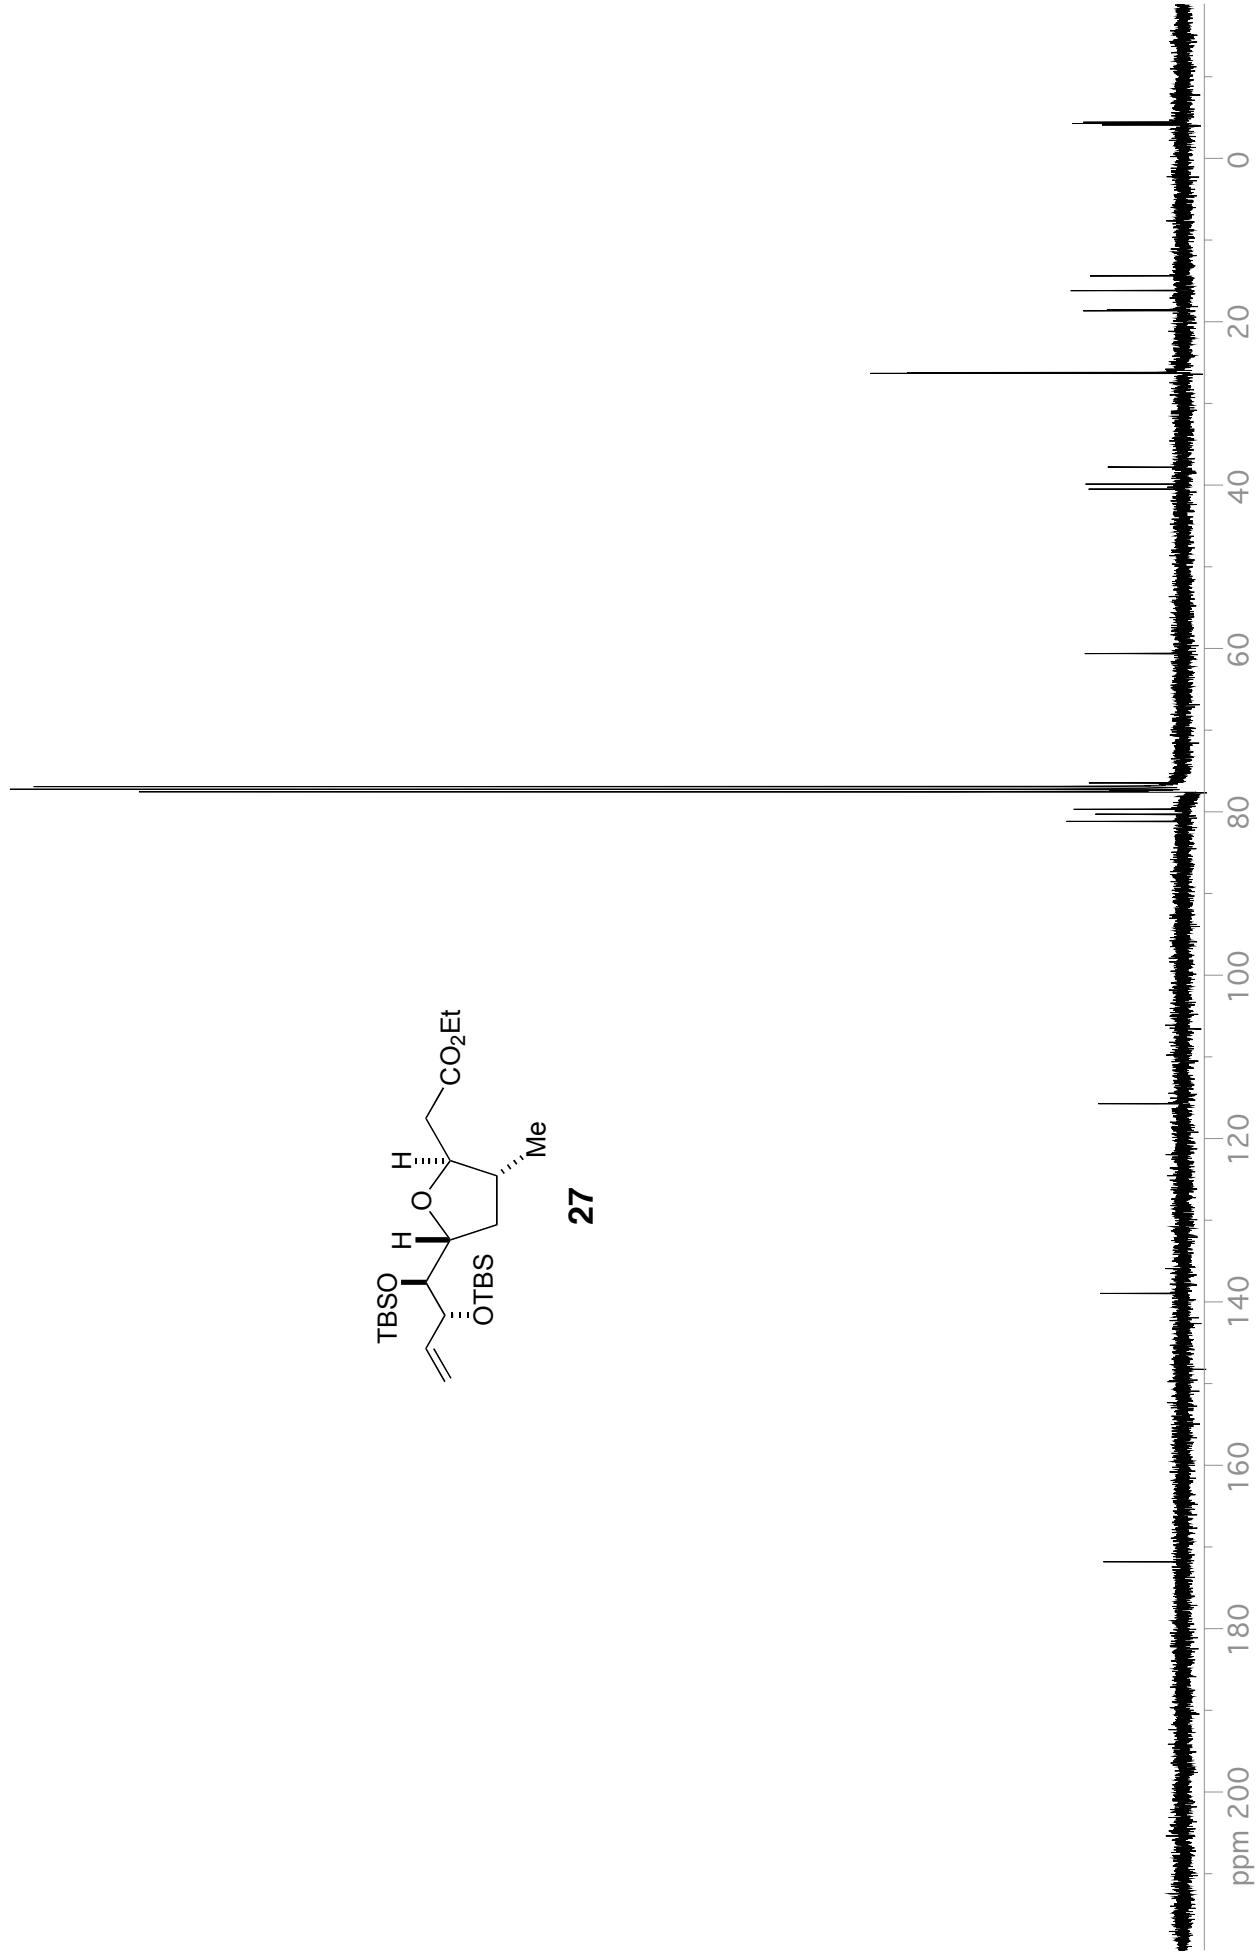

SI-39

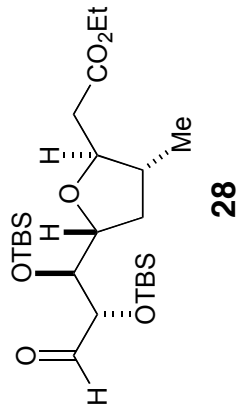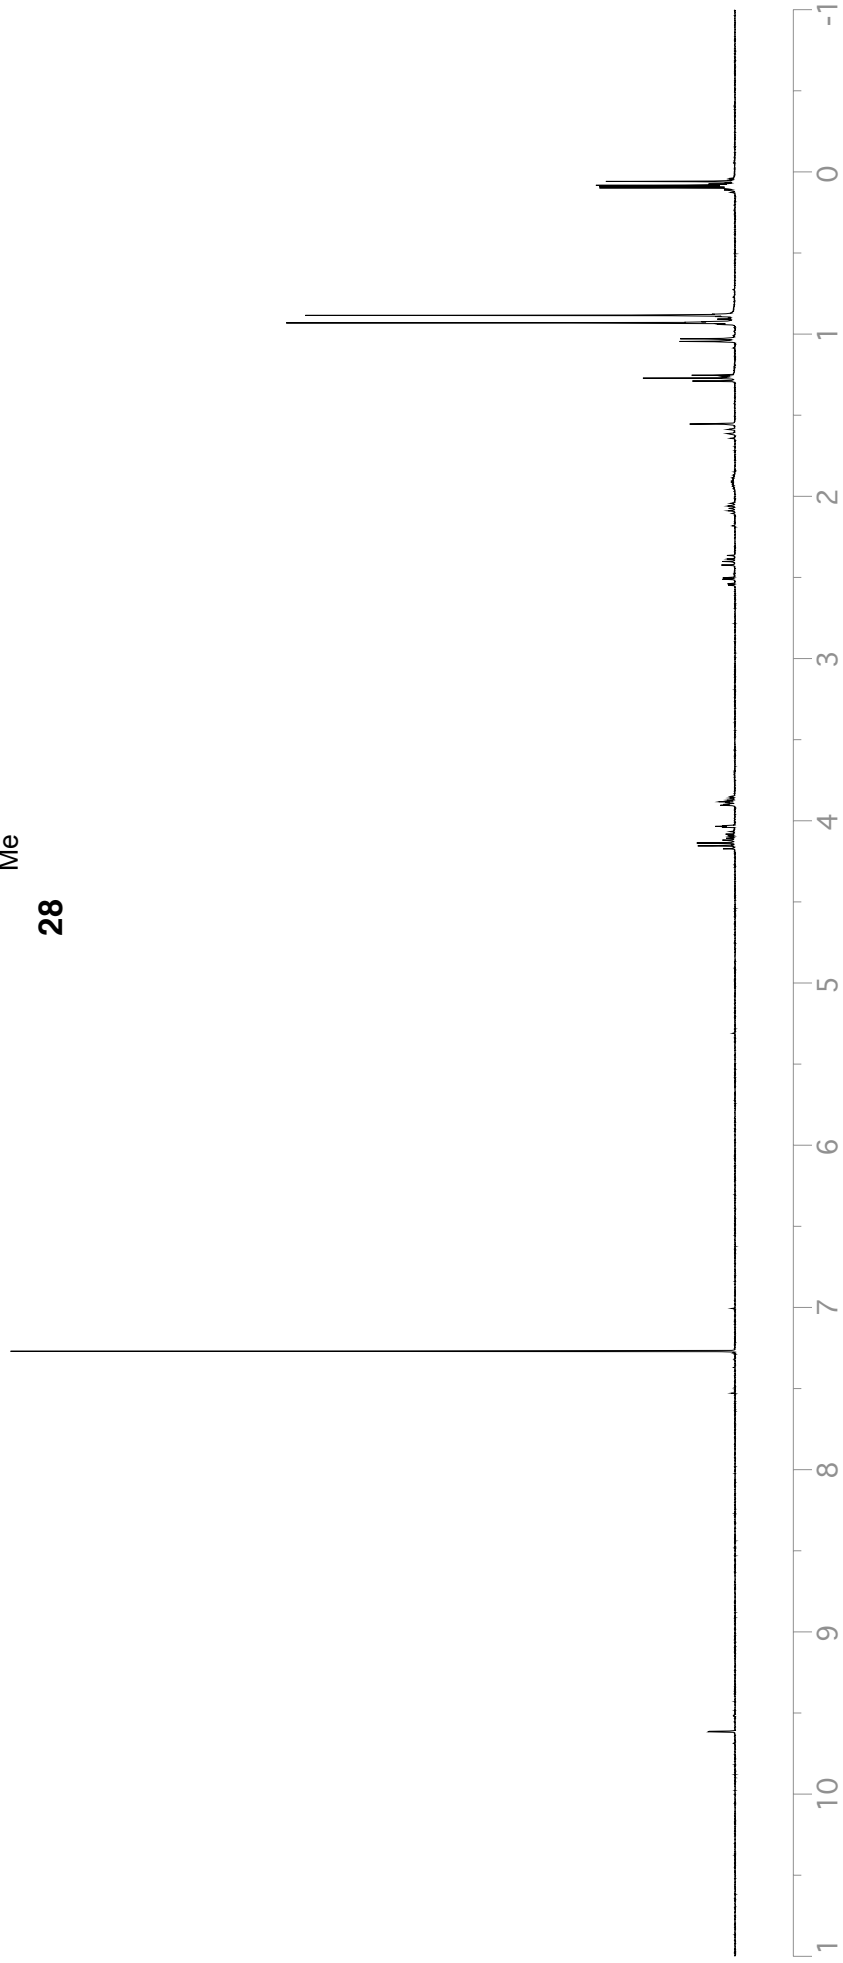

SI-40

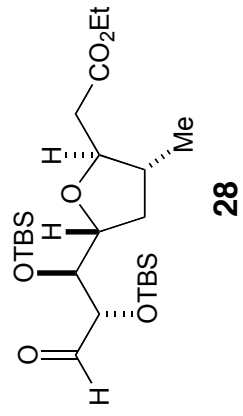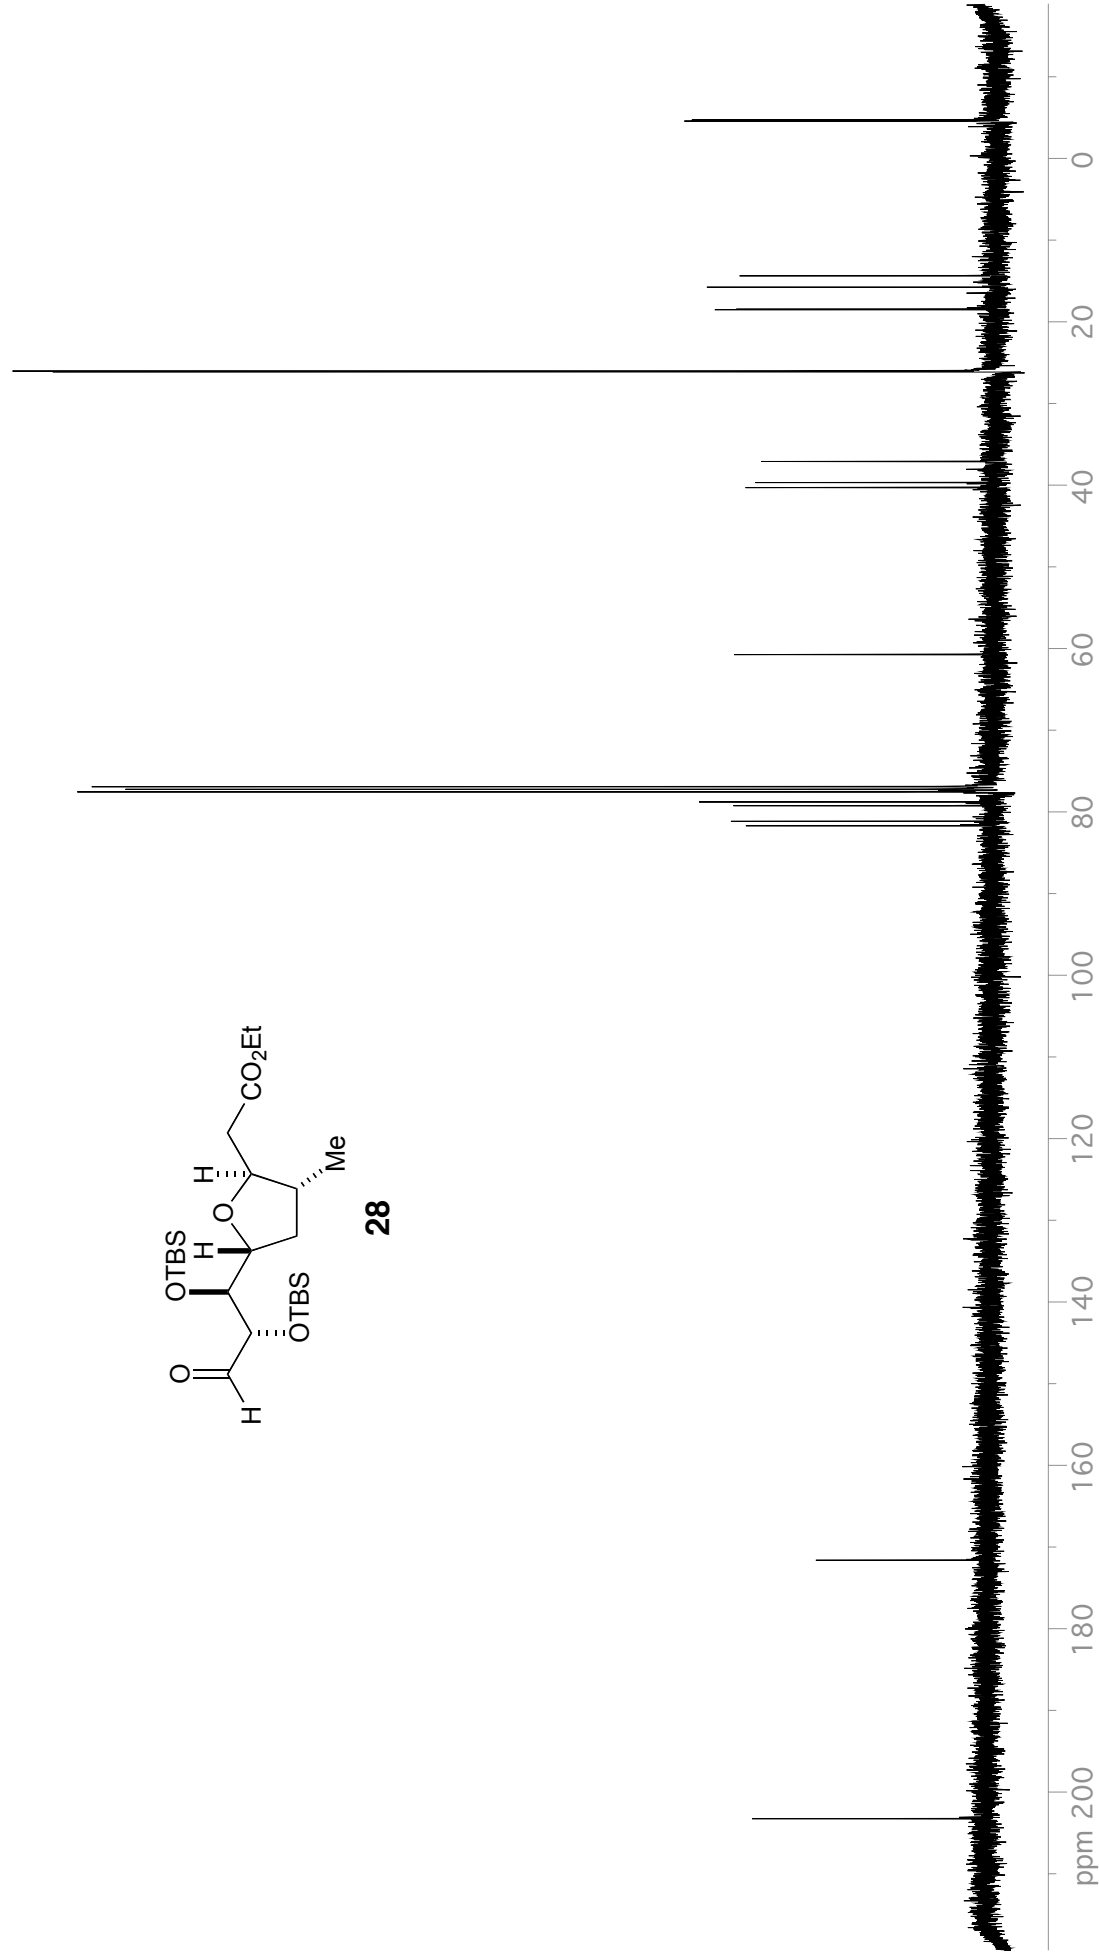

Supplement: NIHMS86307-supplement-2_si_002.pdf [file NIHMS86307-supplement-2_si_002.pdf]
